# Supplementary material for: Transposase mapping identifies the genomic targets of BAP1 in uveal melanoma
Source: PubMed Central journal article supplement (PMC6219186; doi:10.1186/s12920-018-0424-0), 2018-11-06

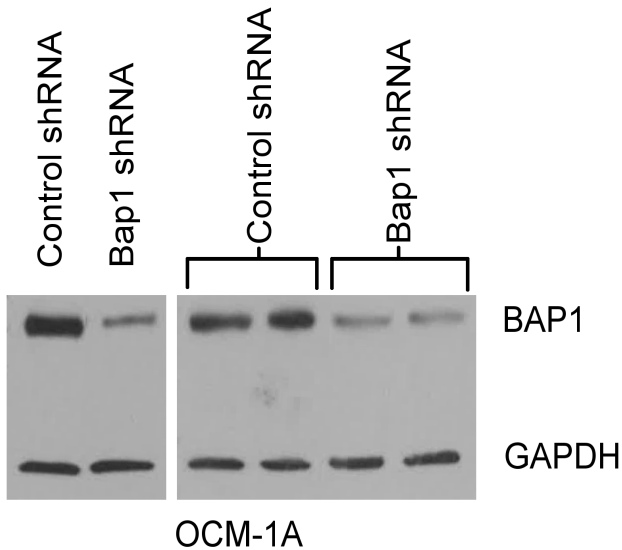

Supplement: 12920_2018_424_MOESM3_ESM.pdf [file 12920_2018_424_MOESM3_ESM.pdf]
