# Supplementary material for: Transposase mapping identifies the genomic targets of BAP1 in uveal melanoma
Source: PubMed Central journal article supplement (PMC6219186; doi:10.1186/s12920-018-0424-0), 2018-11-06
Supplement: 12920_2018_424_MOESM6_ESM.pdf [file 12920_2018_424_MOESM6_ESM.pdf]

**Table S6: Pathways associated with BAP1 target genes.** The ten most significant pathways associated with BAP1 calling-card target genes that were up-regulated (positive response) or down-regulated (negative response) in response to BAP1 depletion. Pathways were identified by GSEA.

**Pathways associated with positive response to BAP1-depletion**

| <b>Description</b>                                 | <b>p-value</b> | <b>FDR q-value</b> |
|----------------------------------------------------|----------------|--------------------|
| HIF-1-alpha transcription factor network           | 0.000000742    | 0.000218           |
| Beta3 integrin cell surface interactions           | 0.00000186     | 0.00031            |
| Direct p53 effectors                               | 0.00000434     | 0.000444           |
| ATF-2 transcription factor network                 | 0.00000912     | 0.000713           |
| Signaling events mediated by focal adhesion kinase | 0.00000912     | 0.000713           |
| ErbB1 downstream signaling                         | 0.0000113      | 0.000774           |
| BCR signaling pathway                              | 0.0000147      | 0.00085            |
| Regulation of retinoblastoma protein               | 0.0000147      | 0.00085            |
| Beta1 integrin cell surface interactions           | 0.0000158      | 0.000878           |
| BCR Signaling Pathway                              | 0.0000283      | 0.00109            |

**Pathways associated with negative response to BAP1-depletion**

| <b>Description</b>                                                                   | <b>p-value</b> | <b>FDR q-value</b> |
|--------------------------------------------------------------------------------------|----------------|--------------------|
| G alpha i Pathway                                                                    | 0.00000209     | 0.000155           |
| PDGFR-beta signaling pathway                                                         | 0.0000137      | 0.000728           |
| EGF receptor (ErbB1) signaling pathway                                               | 0.0000385      | 0.0017             |
| Mechanism of Gene Regulation by Peroxisome Proliferators via PPARa(alpha)            | 0.0000422      | 0.00178            |
| Signaling events mediated by the Hedgehog family                                     | 0.0000894      | 0.00313            |
| Beta1 integrin cell surface interactions                                             | 0.0000879      | 0.00313            |
| Signaling events mediated by TCPTP                                                   | 0.000106       | 0.00353            |
| Direct p53 effectors                                                                 | 0.000144       | 0.00423            |
| Myocyte Adrenergic Pathway is a specific case of the generalized Adrenergic Pathway. | 0.000205       | 0.00569            |
| Signaling events mediated by Hepatocyte Growth Factor Receptor (c-Met)               | 0.000256       | 0.00676            |
