# Supplementary material for: Transposase mapping identifies the genomic targets of BAP1 in uveal melanoma
Source: PubMed Central journal article supplement (PMC6219186; doi:10.1186/s12920-018-0424-0), 2018-11-06
Supplement: 12920_2018_424_MOESM8_ESM.pdf [file 12920_2018_424_MOESM8_ESM.pdf]

**Table S8: DNA motifs associated with BAP1 binding.** HOMER was used to identify DNA motifs that were significantly enriched in genomic regions containing BAP1 calling card insertions. Calling card loci were divided into three categories based on response of associated genes to BAP1 depletion, and analyzed separately.

**Motifs associated with positive response to BAP1-depletion**

| <b>Motif Name</b>                | <b>Consensus Sequence</b> | <b>P-value</b> | <b>% of Target Sequences with Motif</b> | <b>% of Background Sequences with Motif</b> |
|----------------------------------|---------------------------|----------------|-----------------------------------------|---------------------------------------------|
| NRF1 (NRF)                       | CTGCGCATGCGC              | 0.0001         | 21.47%                                  | 10.25%                                      |
| ETS (ETS)                        | AACCGGAAGT                | 0.0001         | 53.99%                                  | 39.06%                                      |
| Unknown (Homeobox)               | SSCMATWAAA                | 0.01           | 91.41%                                  | 83.53%                                      |
| ELF1 (ETS)                       | AVCCGGAAGT                | 0.01           | 65.64%                                  | 54.73%                                      |
| IRF1 (IRF)                       | GAAAGTGAAAGT              | 0.01           | 39.26%                                  | 29.01%                                      |
| Elk4 (ETS)                       | NRYTTCCGGY                | 0.01           | 66.87%                                  | 56.24%                                      |
| LXRE (NR)                        | RGTTACTANAGGTCA           | 0.01           | 58.28%                                  | 47.49%                                      |
| GABPA (ETS)                      | RACCGGAAGT                | 0.01           | 87.73%                                  | 79.83%                                      |
| Mouse Recombination Hotspot (Zf) | ACTYKNATTCGTGNTACTTC      | 0.01           | 22.09%                                  | 14.93%                                      |

**Motifs associated with negative response to BAP1-depletion**

| <b>Motif Name</b> | <b>Consensus</b>     | <b>P-value</b> | <b>% of Target Sequences with Motif</b> | <b>% of Background Sequences with Motif</b> |
|-------------------|----------------------|----------------|-----------------------------------------|---------------------------------------------|
| NRF1 (NRF)        | CTGCGCATGCGC         | 0.00001        | 22.73%                                  | 10.86%                                      |
| ETS (ETS)         | AACCGGAAGT           | 0.0001         | 53.98%                                  | 39.51%                                      |
| GFX (E2F)         | ATTCTCGCGAGA         | 0.001          | 5.68%                                   | 1.54%                                       |
| E2F4 (E2F)        | GGCGGGAAAH           | 0.001          | 56.82%                                  | 44.09%                                      |
| Elk4 (ETS)        | NRYTTCCGGY           | 0.001          | 68.75%                                  | 56.69%                                      |
| NRF (NRF)         | STGCGCATGCGC         | 0.001          | 23.86%                                  | 14.74%                                      |
| Sp1 (Zf)          | GGCCCCGCCCC          | 0.01           | 48.30%                                  | 37.09%                                      |
| Ronin (THAP)      | RACTACAACCTCCAGVAKGC | 0.01           | 6.82%                                   | 2.86%                                       |

**Motifs associated with no response to BAP1-depletion**

| <b>Motif Name</b> | <b>Consensus</b> | <b>P-value</b> | <b>% of Target Sequences with Motif</b> | <b>% of Background Sequences with Motif</b> |
|-------------------|------------------|----------------|-----------------------------------------|---------------------------------------------|
| ETS (ETS)         | AACCGGAAGT       | 1E-12          | 57.51%                                  | 38.96%                                      |
| ELF1 (ETS)        | AVCCGGAAGT       | 1E-09          | 69.69%                                  | 54.48%                                      |
| NRF1 (NRF)        | CTGCGCATGCGC     | 1E-08          | 20.73%                                  | 10.69%                                      |
| Elk4 (ETS)        | NRYTTCCGGY       | 1E-07          | 70.47%                                  | 56.68%                                      |
| E2F4 (E2F)        | GGCGGGAAAH       | 1E-07          | 57.25%                                  | 43.54%                                      |
| Elk1 (ETS)        | HACTTCCGGY       | 1E-07          | 69.69%                                  | 56.65%                                      |
| YY1 (Zf)          | CAAGATGGCGGC     | 0.0001         | 18.13%                                  | 10.97%                                      |
| Sp1 (Zf)          | GGCCCCGCCCC      | 0.0001         | 47.41%                                  | 37.05%                                      |
| BMYB (HTH)        | NHAACBGYYV       | 0.0001         | 99.48%                                  | 96.03%                                      |
| GFX (E2F)         | ATTCTCGCGAGA     | 0.0001         | 4.92%                                   | 1.68%                                       |
