# Supplementary material for: Transposase mapping identifies the genomic targets of BAP1 in uveal melanoma
Source: BMC Med Genomics. 2018 Nov 6;11:97. doi: 10.1186/s12920-018-0424-0 (PMC6219186; doi:10.1186/s12920-018-0424-0)
Supplement: Supplementary file 1 — BAP1-PBase genomic peaks. List of genomic regions of transposon insertion from the BAP1-PBase construct giving location, number of insertion events (hops), significance, and nearest gene (Feature). (XLSX 636 kb) [file 12920_2018_424_MOESM1_ESM.xlsx]

## Sheet: OCM1A_BapN_hc_5000.sig
Chr	Start	End	Center	Experiment Hops	Background Hops	Poisson pvalue	Nearest Feature sName	Nearest Feature Name	Nearest Feature Distance
chr8	22643147	22647607	22644792	19	0	0	NM_018688	BIN3	0
chr8	73971410	73972808	73971731	22	0	0	NM_005648	ELOC	0
chr20	45778822	45781903	45779051	24	0	0	NM_080614	WFDC3	0
chr8	61709034	61713576	61712246	20	0	0	NM_004318	ASPH	0
chr19	4468290	4471939	4471529	37	0	0	NM_001001520	HDGFL2	257
chr2	74843021	74844313	74843776	19	0	0	NM_000189	HK2	0
chr5	65623885	65625471	65624733	24	0	0	NM_033227	TRIM23	0
chr20	47334033	47336414	47336329	31	0	0	NM_001281777	ZMYND8	0
chr19	2782913	2786261	2785154	24	0	0	NM_003021	SGTA	0
chr1	67830317	67834963	67831999	42	0	0	NM_018841	GNG12	0
chr5	69189395	69189974	69189898	23	0	0	NM_022909	CENPH	0
chr12	50393830	50402454	50400267	38	0	0	NM_001145475	FAM186A	0
chr13	51583944	51585519	51583944	23	0	0	NM_052950	WDFY2	0
chr16	58628341	58631912	58629128	22	0	0	NM_001265612	CNOT1	0
chr3	27590480	27596666	27590940	21	0	0	NM_001321105	SLC4A7	-106060
chr2	84965296	84973354	84965488	28	0	0	NM_020122	KCMF1	0
chr11	18527166	18528108	18527220	21	0	0	NM_006292	TSG101	-210
chr12	49843050	49843689	49843050	20	0	0	NM_181708	BCDIN3D	0
chr19	1587823	1591990	1588481	29	0	0	NM_001281454	MBD3	0
chr11	27495969	27499369	27497404	24	0	0	NM_018362	LIN7C	0
chr1	77679993	77682880	77682766	42	1	0	NM_015534	ZZZ3	0
chr20	63783128	63786473	63786174	20	0	0	NM_025224	ZBTB46	0
chr16	70346316	70347427	70346729	19	0	0	NR_039997	LOC100506083	0
chr2	73827253	73829487	73828745	25	0	0	NM_201647	STAMBP	0
chr12	53295316	53299768	53295581	30	0	0	NM_002624	PFDN5	0
chr17	43483644	43485678	43484454	53	2	0	NM_001322221	DHX8	0
chr1	197141562	197147884	197146631	24	0	0	NM_001206846	ASPM	0
chr2	69893246	69894428	69894406	26	0	0	NR_037862	SNRNP27	0
chr19	6248837	6249706	6249422	46	0	0	NM_005934	MLLT1	0
chr2	70085932	70087952	70087337	43	0	0	NR_033872	PCBP1-AS1	0
chr20	34111299	34113073	34111486	33	1	0	NM_001316363	EIF2S2	0
chr20	34955840	34955843	34955840	20	0	0	NM_001322494	GSS	0
chr4	25158939	25161670	25160674	37	1	0	NM_016955	SEPSECS	0
chr13	31045942	31047274	31047098	19	0	0	NM_152325	TEX26	-70926
chr1	88679366	88685269	88683972	31	0	0	NR_110682	PKN2-AS1	0
chr16	81002634	81008133	81005985	20	0	0	NR_147843	CMC2	0
chr17	44689975	44690471	44690468	20	0	0	NM_001099225	CCDC43	-178
chr3	37907805	37911124	37908006	33	0	0	NM_005808	CTDSPL	0
chr11	9719604	9720192	9719888	29	0	0	NM_001297714	SWAP70	0
chr20	37289421	37290456	37289468	39	0	0	NM_001003897	MANBAL	0
chr11	14518979	14520846	14519537	35	0	0	NM_148976	PSMA1	0
chr8	85220313	85220337	85220334	22	0	0	NM_001293320	C8orf59	0
chr2	73733787	73737621	73737618	24	0	0	NM_001330388	TPRKB	0
chr1	78003522	78009352	78004974	24	0	0	NM_001317100	DNAJB4	0
chr17	43169980	43175834	43171957	24	0	0	NR_110868	LOC101929767	0
chr1	62435838	62439615	62436390	58	0	0	NM_001017416	USP1	0
chr8	21917470	21922637	21919444	21	0	0	NM_015024	XPO7	0
chr16	29863221	29868029	29863225	26	0	0	NM_001286585	CDIPT	0
chr14	23091543	23096912	23095678	35	1	0	NM_001164814	ACIN1	0
chr2	99878522	99880255	99879332	19	0	0	NM_002285	AFF3	0
chr7	127651203	127655644	127653073	24	0	0	NM_014390	SND1	0
chr11	47176810	47177563	47176810	27	0	0	NM_001242832	ARFGAP2	0
chr22	26672083	26674816	26672394	22	0	0	NR_003491	MIAT	0
chr1	42333190	42335823	42334224	22	0	0	NM_014947	FOXJ3	0
chr1	42320122	42325343	42322572	34	1	0	NM_014947	FOXJ3	0
chr7	120949356	120950322	120949846	21	0	0	NM_198267	ING3	441
chr11	57711323	57713087	57712363	30	0	0	NM_001317078	MED19	0
chr5	134905745	134908371	134905843	25	0	0	NM_032151	PCBD2	0
chr5	138177976	138182117	138178783	35	0	0	NM_139199	BRD8	0
chr14	31024018	31027372	31027345	20	0	0	NM_014574	STRN3	0
chr17	49787795	49788504	49788305	28	0	0	NM_001346706	KAT7	115
chr5	138542157	138544436	138543533	28	0	0	NM_001291975	ETF1	0
chr1	222711170	222714507	222713720	26	0	0	NM_022831	AIDA	0
chr17	51143176	51147751	51144933	40	0	0	NM_001018136	NME1-NME2	5785
chr5	139342205	139342665	139342208	22	0	0	NM_016480	PAIP2	0
chr7	100612199	100612234	100612231	30	0	0	NM_001040097	MOSPD3	0
chr2	99336765	99339517	99338121	22	0	0	NM_015904	EIF5B	0
chr19	32342387	32352458	32346555	19	0	0	NM_001136156	ZNF507	0
chr1	44730507	44733592	44732100	21	0	0	NR_002755	RNU5D-1	0
chr13	114234060	114241039	114235572	23	0	0	NM_001078645	CDC16	0
chr21	25730807	25736101	25735959	24	0	0	NM_001685	ATP5J	0
chr18	74597024	74598585	74597189	34	0	0	NR_024484	LINC00909	0
chr2	86192317	86202098	86196288	54	4	0	NM_006839	IMMT	0
chr1	54763550	54765682	54764041	27	0	0	NM_152268	PARS2	0
chr12	49018231	49019264	49019147	32	1	0	NR_147178	DDN-AS1	0
chr21	37264856	37268166	37266749	21	0	0	NM_001331021	DSCR3	0
chr3	120163084	120163346	120163263	26	0	0	NM_001168271	GPR156	2135
chr3	197956925	197958076	197957592	28	0	0	NM_001323028	IQCG	0
chr18	63367831	63367945	63367942	20	0	0	NM_002035	KDSR	-558
chr16	31070519	31074061	31074058	20	0	0	NM_024706	ZNF668	0
chr16	30922006	30923026	30922297	26	0	0	NR_024348	FBXL19-AS1	0
chr7	149025979	149029127	149028684	23	0	0	NM_004911	PDIA4	0
chr5	110736274	110740537	110738482	23	0	0	NM_001303250	SLC25A46	0
chr21	44337782	44338218	44338062	21	0	0	NM_004928	C21orf2	0
chr16	30657616	30659397	30658945	86	1	0	NM_001105079	FBRS	122
chr3	9792237	9794881	9792896	19	0	0	NM_006354	TADA3	0
chr3	9750141	9750578	9750163	26	0	0	NM_016828	OGG1	0
chr5	121959927	121963516	121961563	32	0	0	NM_152546	SRFBP1	0
chr2	97662768	97664741	97664234	19	0	0	NM_005735	ACTR1B	0
chr1	45302476	45303485	45303482	25	0	0	NR_024270	LINC01144	425
chr20	10432859	10435321	10435063	25	0	0	NM_170784	MKKS	0
chr15	66503655	66507706	66505199	28	0	0	NM_000968	RPL4	0
chr8	140898289	140900807	140898334	20	0	0	NM_001352717	PTK2	0
chr1	174996611	175002397	174998724	34	0	0	NM_001007214	CACYBP	0
chr17	42132067	42132416	42132207	21	0	0	NM_201434	RAB5C	0
chr4	139079540	139084939	139082908	46	0	0	NM_001331036	ELF2	0
chr12	102119316	102122713	102119784	26	0	0	NM_024057	NUP37	0
chr12	103965146	103966632	103966524	22	0	0	NM_003211	TDG	0
chr19	14005047	14007586	14006754	26	0	0	NM_002918	RFX1	0
chr1	153920221	153924142	153923255	19	0	0	NM_020699	GATAD2B	0
chr12	108557368	108563795	108561690	37	1	0	NM_014706	SART3	0
chr1	151908048	151910372	151908619	61	3	0	NM_053055	THEM4	0
chr19	47582517	47582983	47582826	24	0	0	NM_001277075	ZNF541	-9405
chr19	47598209	47601610	47600491	29	0	0	NM_015711	BICRA	6586
chr3	52196108	52200211	52197791	25	0	0	NM_000688	ALAS1	0
chr1	150920141	150927459	150926757	30	0	0	NM_001243491	SETDB1	0
chr17	7579487	7583891	7579487	26	0	0	NM_001251	CD68	0
chr1	150691965	150698499	150697516	45	1	0	NM_018178	GOLPH3L	0
chr17	7328843	7330071	7329101	22	0	0	NM_032442	NEURL4	0
chr12	55927209	55931710	55928147	21	0	0	NM_032345	PYM1	0
chr1	150293256	150297373	150293607	36	1	0	NM_018997	MRPS21	0
chr10	102501346	102503423	102502843	54	0	0	NM_005736	ACTR1A	0
chr2	33705267	33710356	33706545	50	0	0	NR_126403	LINC01317	0
chr1	149927540	149928016	149927915	20	0	0	NM_005850	SF3B4	0
chr9	134164480	134165824	134164720	21	0	0	NR_023344	RNU6ATAC	0
chr19	16180713	16187177	16185877	23	0	0	NM_014077	FAM32A	0
chr1	169363466	169371791	169367994	38	0	0	NM_013330	NME7	0
chr1	170531021	170534839	170532316	24	0	0	NR_125958	LOC101928650	0
chr1	168224906	168228539	168227578	29	0	0	NM_199344	SFT2D2	0
chr19	35740168	35748243	35745508	22	0	0	NM_001346006	IGFLR1	0
chr4	88519089	88524420	88522990	50	1	0	NM_001042616	PIGY	0
chr4	94207446	94207831	94207777	38	1	0	NR_125922	LOC101929210	0
chr12	70241549	70246191	70244334	29	0	0	NR_120460	LINC01481	0
chr12	71661345	71665076	71664312	32	0	0	NM_144982	ZFC3H1	0
chr1	161765251	161767035	161765847	52	1	0	NM_007348	ATF6	0
chr10	29343535	29344901	29343666	20	0	0	NM_032517	LYZL1	-32306
chr1	161153357	161159332	161153777	25	0	0	NM_016406	UFC1	0
chr19	40284640	40286089	40285740	42	1	0	NM_001243028	AKT2	0
chr4	112636488	112638811	112637254	24	0	0	NM_001350397	ZGRF1	0
chr17	39460445	39461504	39461188	22	0	0	NM_015083	CDK12	7
chr19	17215066	17215365	17215135	27	0	0	NM_018467	USE1	0
chr1	156767112	156769209	156767112	28	0	0	NM_005973	PRCC	0
chr19	16658999	16664006	16664003	21	0	0	NM_024104	SMIM7	0
chr1	156501100	156505511	156505322	20	0	0	NM_005920	MEF2D	-258
chr19	44887934	44891795	44890098	35	0	0	NM_001042724	NECTIN2	0
chr1	155933688	155936376	155934583	70	1	0	NM_014949	KIAA0907	0
chr4	151323594	151326354	151325899	34	0	0	NM_183375	PRSS48	-32141
chr10	102582310	102586760	102582454	20	0	0	NM_001178133	SUFU	0
chr10	102641779	102642374	102642086	26	0	0	NR_144321	TRIM8	2121
chr19	55598727	55599465	55599462	21	0	0	NM_032836	FIZ1	0
chr19	55604687	55606336	55605079	21	0	0	NM_153219	ZNF524	-1549
chr17	1515713	1517693	1515840	19	0	0	NM_001135642	INPP5K	0
chr19	56090522	56092125	56091265	35	0	0	NM_001002836	ZNF787	0
chr12	122224603	122225421	122224952	22	0	0	NM_001278304	DIABLO	0
chr12	122517950	122518007	122517996	19	0	0	NM_023012	RSRC2	0
chr1	109089468	109092312	109089686	19	0	0	NM_001322248	TMEM167B	0
chr9	35812537	35815774	35815631	20	0	0	NM_032593	HINT2	0
chr9	35602595	35604256	35604079	21	0	0	NM_006285	TESK1	1028
chr19	57348664	57351017	57350868	24	0	0	NM_001290318	ZNF304	257
chr16	89981490	89982215	89981740	28	0	0	NR_003228	AFG3L1P	0
chr9	32550394	32554548	32552585	27	0	0	NM_001195622	TOPORS	0
chr5	1799246	1801996	1800718	21	0	0	NM_032479	MRPL36	0
chr10	110267719	110270277	110269627	20	0	0	NM_130439	MXI1	0
chr20	2470967	2474892	2470967	24	0	0	NM_003091	SNRPB	-114
chr20	2664397	2664828	2664473	19	0	0	NM_001330763	IDH3B	-174
chr4	52710406	52716180	52712031	22	0	0	NR_024031	DANCR	0
chr3	44624578	44629672	44626427	19	0	0	NM_001351732	ZNF660-ZNF197	0
chr16	85308371	85310404	85308494	20	0	0	NR_049816	MIR5093	-2046
chr4	56973390	56981911	56977812	46	0	0	NM_032313	NOA1	0
chr4	183443482	183449227	183445342	26	0	0	NM_001317343	CDKN2AIP	0
chr2	61536449	61540142	61538063	20	0	0	NM_003400	XPO1	0
chr3	49091458	49094630	49094414	43	0	0	NM_001320584	QRICH1	0
chr19	49493047	49498120	49496305	39	0	0	NM_001015	RPS11	0
chr3	50235677	50235758	50235749	33	0	0	NM_001282620	GNAI2	0
chr19	12681254	12681836	12681295	27	0	0	NR_038192	DHPS	0
chr19	12669761	12669891	12669761	22	0	0	NM_001099737	WDR83	0
chr19	49876580	49877608	49877305	39	0	0	NM_001278160	AKT1S1	0
chr17	5486625	5487511	5486625	29	0	0	NM_001258218	MIS12	0
chr9	112754760	112757557	112754760	24	0	0	NM_001012994	SNX30	0
chr3	50088692	50088787	50088784	20	0	0	NM_005778	RBM5	121
chr19	12550742	12552132	12551730	20	0	0	NM_144976	ZNF564	0
chr5	140647589	140648002	140647589	22	0	0	NM_001185012	NDUFA2	0
chr19	52139610	52143336	52139699	20	0	0	NR_135823	ZNF616	0
chr9	97626883	97635330	97633046	30	0	0	NM_139246	TSTD2	0
chr17	4966292	4968135	4967207	61	0	0	NM_004890	SPAG7	0
chr2	55615023	55619086	55618296	54	0	0	NM_001122964	PPP4R3B	0
chr12	120193711	120195488	120194323	23	0	0	NM_006836	GCN1	0
chr1	114581647	114585265	114582413	27	0	0	NM_001256404	DENND2C	0
chr17	4944492	4948892	4948889	19	0	0	NM_001320356	RNF167	0
chr17	4940471	4941487	4940471	19	0	0	NM_001320356	RNF167	0
chr19	11435460	11435463	11435460	20	0	0	NM_001302453	CCDC151	0
chr3	49407843	49416317	49412228	36	0	0	NM_001313941	RHOA	0
chr4	169619590	169622264	169622041	20	0	0	NM_001243372	CLCN3	0
chr7	99407545	99409867	99408113	25	0	0	NM_014891	PDAP1	0
chr12	62602383	62602946	62602820	20	0	0	NR_121682	LINC01465	0
chr12	6722786	6725565	6723884	60	5	0	NM_016319	COPS7A	0
chr14	77707475	77712897	77708286	23	0	0	NM_006020	ALKBH1	0
chrX	70435429	70438737	70437192	21	0	0	NM_001171191	GDPD2	-2038
chr12	6969600	6975456	6970887	25	0	0	NM_001144831	PHB2	0
chr16	2601037	2605799	2603418	33	0	0	NM_001261816	PDPK1	0
chr16	2866439	2868811	2868143	21	0	0	NM_022119	PRSS22	-8269
chr15	59685604	59691467	59688581	29	0	0	NM_001320675	BNIP2	0
chrX	47232511	47236270	47236137	19	0	0	NM_004651	USP11	0
chr1	6783741	6784627	6784178	22	0	0	NM_001349609	CAMTA1	697
chr15	78436502	78439126	78437675	33	0	0	NM_001320941	IREB2	0
chr14	69398289	69401495	69398521	40	0	0	NM_004450	ERH	0
chr6	4015789	4023660	4019529	70	5	0	NR_146783	PRPF4B	0
chr1	12406145	12407849	12407157	22	0	0	NM_015378	VPS13D	0
chr15	22838371	22839938	22838443	21	0	0	NM_001008860	NIPA2	0
chr16	3133887	3138848	3134209	20	0	0	NR_110900	ZNF213-AS1	0
chr2	3377270	3380787	3377391	32	1	0	NM_001330530	EIPR1	0
chr7	56105816	56106790	56106019	22	0	0	NM_001320327	CHCHD2	0
chr2	135984145	135987411	135984928	20	0	0	NM_001293312	DARS	0
chr22	41283758	41291302	41286753	19	0	0	NM_001278651	RANGAP1	0
chr2	219177390	219179227	219177769	28	0	0	NM_001321389	CNPPD1	0
chr11	90220957	90225222	90223918	22	0	0	NM_001144073	CHORDC1	0
chr14	68951997	68959989	68955972	25	0	0	NM_001102	ACTN1	0
chr17	77087702	77089706	77088531	25	0	0	NR_027058	SNHG20	0
chr15	75638468	75642298	75640152	21	0	0	NM_018285	IMP3	0
chr22	40853811	40859285	40856821	21	0	0	NM_003932	ST13	0
chr22	40619167	40623253	40621487	25	0	0	NM_001282661	MKL1	0
chr6	170553595	170554421	170554144	54	1	0	NM_003194	TBP	0
chr16	690190	690620	690190	19	0	0	NM_032259	WDR24	0
chr2	158994919	158999504	158998723	27	0	0	NM_001350062	TANC1	0
chr22	46758926	46762557	46762554	21	0	0	NM_001284303	TBC1D22A	60
chr7	4739432	4746098	4745921	19	0	0	NM_001037165	FOXK1	0
chr1	22022976	22026458	22025199	25	0	0	NR_110692	LINC01635	0
chr6	108587672	108590007	108589510	26	0	0	NM_201559	FOXO3	0
chr17	68381015	68384270	68381355	24	0	0	NM_001352903	ARSG	0
chr12	8026345	8027225	8026536	23	0	0	NM_018416	FOXJ2	5538
chr18	21612118	21613179	21612837	35	0	0	NM_001291916	SNRPD1	0
chr11	108198945	108200504	108200317	21	0	0	NM_001321307	NPAT	0
chr7	6345987	6349217	6349203	26	0	0	NM_001037163	FAM220A	0
chr5	181216591	181219036	181218533	21	0	0	NR_039781	MIR4638	3530
chr1	23368663	23371757	23369022	21	0	0	NM_001077195	ZNF436	0
chr14	92793105	92795732	92793469	34	0	0	NM_005113	GOLGA5	0
chr5	179730799	179734450	179732675	22	0	0	NM_001024649	CANX	0
chr7	72828470	72830138	72829022	29	0	0	NR_024111	SBDSP1	0
chr14	92039054	92040361	92039330	38	0	0	NM_001321851	TRIP11	0
chr1	231526791	231530237	231528156	22	0	0	NM_005999	TSNAX	0
chr17	60599519	60602602	60599889	22	0	0	NM_003620	PPM1D	0
chr6	99424751	99426023	99425316	44	0	0	NM_001322416	PNISR	0
chrX	13652199	13653705	13652748	19	0	0	NM_001297563	TCEANC	0
chr2	202911763	202913149	202911763	19	0	0	NM_018256	WDR12	0
chr2	206157821	206159825	206159693	27	0	0	NM_001199983	NDUFS1	0
chr5	176535970	176538135	176537392	30	0	0	NM_014901	RNF44	0
chr5	172983457	172984671	172984351	24	0	0	NM_003945	ATP6V0E1	0
chr3	169772126	169774137	169772707	27	0	0	NM_018657	MYNN	0
chr11	65961451	65964482	65961473	42	1	0	NM_005146	SART1	0
chr11	65610385	65615410	65615407	27	0	0	NM_002419	MAP3K11	0
chr22	47022053	47022295	47022292	23	0	0	NM_001284303	TBC1D22A	0
chrX	15334719	15336313	15336041	20	0	0	NM_002641	PIGA	0
chr11	77993692	77995255	77994627	34	0	0	NM_033547	INTS4	0
chr2	200888990	200890948	200889705	60	0	0	NM_032472	PPIL3	0
chr15	75450227	75455949	75453701	43	0	0	NM_015477	SIN3A	0
chr1	33127475	33128405	33127638	34	0	0	NM_001350401	AZIN2	-6944
chr22	38794318	38796785	38794418	24	0	0	NM_005740	DNAL4	-162
chr11	62839738	62842851	62841153	35	0	0	NM_018093	WDR74	0
chr16	19523410	19525500	19523853	19	0	0	NM_001323572	CCP110	0
chr17	75854849	75860120	75855723	19	0	0	NM_012478	WBP2	0
chr2	112481750	112482591	112481825	20	0	0	NM_153712	TTL	0
chr1	32648325	32650912	32650704	25	0	0	NM_001330475	ZBTB8OS	0
chr11	72080546	72081206	72080607	29	0	0	NM_001286561	NUMA1	0
chrX	54999439	55000716	54999767	20	0	0	NM_001271748	APEX2	0
chr15	66356869	66359876	66357077	23	0	0	NM_001289986	TIPIN	-153
chr11	75398000	75404017	75400384	22	0	0	NM_001005	RPS3	0
chr7	98131680	98134997	98131944	19	0	0	NM_014916	LMTK2	0
chr11	64777415	64779430	64779307	29	0	0	NM_001178031	SF1	0
chr14	56117508	56119673	56118108	21	0	0	NM_021255	PELI2	0
chrX	49877228	49881524	49879255	26	0	0	NR_026742	USP27X-AS1	0
chr1	15525803	15528041	15526484	25	0	0	NM_015291	DNAJC16	0
chr16	4767430	4769618	4768428	22	0	0	NM_021646	ZNF500	-212
chr1	16347554	16352764	16348888	22	0	0	NM_018994	FBXO42	0
chr14	101809305	101810531	101809908	50	1	0	NM_001352914	PPP2R5C	0
chr2	9842609	9844889	9843819	27	0	0	NM_005680	TAF1B	0
chr1	15965540	15966304	15965540	19	0	0	NM_001287604	ZBTB17	0
chrX	56726911	56729165	56728484	19	0	0	NM_001348129	NBDY	54
chr17	76262003	76266613	76264640	50	1	0	NM_182565	UBALD2	0
chr5	150448568	150450450	150450110	60	3	0	NM_001025070	RPS14	0
chr6	154734028	154738836	154734298	21	0	0	NM_014892	SCAF8	0
chr1	1470735	1473874	1471386	28	0	0	NM_031921	ATAD3B	0
chr15	72472940	72475502	72473758	24	0	0	NR_135678	TMEM202-AS1	0
chr7	91879953	91881331	91880497	20	0	0	NM_001301134	MTERF1	0
chr6	155311249	155319894	155315400	20	0	0	NR_146725	TFB1M	0
chr22	37842414	37844940	37843463	19	0	0	NR_039973	MIR5096	0
chr7	100119060	100121467	100120193	27	0	1.11022e-16	NM_139315	TAF6	0
chr8	66662500	66667759	66667608	30	1	1.11022e-16	NM_025054	VCPIP1	0
chr11	119102089	119103904	119102225	31	1	1.11022e-16	NM_001382	DPAGT1	-14
chr12	12611268	12614958	12611732	30	1	1.11022e-16	NM_001310	CREBL2	0
chr16	71808904	71812051	71809794	22	0	1.11022e-16	NM_001030007	AP1G1	0
chr19	3761014	3763458	3762014	47	2	2.22045e-16	NM_004886	APBA3	0
chr19	4721482	4725852	4722591	30	1	3.33067e-16	NM_139159	DPP9	0
chr5	88268267	88269536	88269289	21	0	3.33067e-16	NM_001349407	TMEM161B	0
chr1	207048287	207053020	207050140	18	0	4.44089e-16	NM_018566	YOD1	0
chr19	49451363	49453286	49453191	18	0	4.44089e-16	NM_017916	PIH1D1	0
chr16	17305710	17307390	17305719	17	0	4.44089e-16	NM_022166	XYLT1	0
chr8	54021776	54023037	54022720	18	0	4.44089e-16	NM_006756	TCEA1	0
chr7	107593521	107596574	107595512	18	0	4.44089e-16	NR_027830	BCAP29	0
chr17	7932031	7933755	7932031	18	0	4.44089e-16	NM_001330124	CNTROB	0
chr10	102054450	102056598	102055064	17	0	4.44089e-16	NM_024541	C10orf76	0
chr12	64452633	64453910	64452658	18	0	4.44089e-16	NM_013254	TBK1	0
chr11	63974329	63976692	63974329	17	0	4.44089e-16	NM_004074	COX8A	0
chr17	50151567	50155306	50151879	17	0	4.44089e-16	NM_032595	PPP1R9B	-1050
chr5	42577606	42579715	42579529	17	0	4.44089e-16	NM_000163	GHR	0
chr7	99918946	99920198	99919857	17	0	4.44089e-16	NM_033091	TRIM4	0
chr3	179562987	179563922	179562991	19	0	4.44089e-16	NM_004301	ACTL6A	0
chr2	202037907	202039515	202038939	18	0	4.44089e-16	NM_003507	FZD7	0
chr15	82749397	82752581	82750330	17	0	4.44089e-16	NR_110099	SNHG21	0
chr11	102555166	102561255	102559936	18	0	4.44089e-16	NM_004771	MMP20	15580
chr12	110078839	110080684	110079694	17	0	4.44089e-16	NM_207435	C12orf76	-11144
chr22	31846317	31846536	31846363	17	0	4.44089e-16	NR_146296	DEPDC5	0
chr3	134485087	134487222	134486108	17	0	4.44089e-16	NM_001242375	ANAPC13	0
chr22	31750303	31756194	31753365	18	0	4.44089e-16	NR_146296	DEPDC5	0
chr22	31659891	31662588	31661046	17	0	4.44089e-16	NM_001326420	PISD	0
chr11	61430394	61435426	61430498	17	0	4.44089e-16	NM_017841	SDHAF2	0
chr19	6199882	6204275	6199982	18	0	4.44089e-16	NM_005934	MLLT1	6106
chr19	48635413	48638040	48638037	17	0	4.44089e-16	NM_001352	DBP	0
chr12	53218559	53223797	53219816	18	0	4.44089e-16	NM_001243731	RARG	0
chr15	90929968	90932305	90930182	18	0	4.44089e-16	NM_001039675	UNC45A	0
chr16	67160364	67164191	67164188	17	0	4.44089e-16	NM_018378	FBXL8	0
chr19	45860799	45866249	45862594	18	0	4.44089e-16	NM_004819	SYMPK	0
chrX	72181090	72184847	72181228	17	0	4.44089e-16	NR_033187	PIN4	0
chr14	58244287	58247748	58245637	18	0	4.44089e-16	NM_002788	PSMA3	0
chr17	49675653	49676908	49676905	18	0	4.44089e-16	NM_003563	SPOP	0
chr9	34329610	34329613	34329610	17	0	4.44089e-16	NM_001161	NUDT2	0
chr14	100617977	100618153	100618043	17	0	4.44089e-16	NR_024096	LINC00523	39115
chr3	69286742	69289359	69289115	18	0	4.44089e-16	NM_015123	FRMD4B	0
chr17	22206102	22209821	22206102	17	0	4.44089e-16	NR_144546	UBBP4	-946
chr11	125112178	125112693	125112178	17	0	4.44089e-16	NM_001258238	TMEM218	-415
chr13	102845666	102846090	102846087	17	0	4.44089e-16	NM_001204425	BIVM-ERCC5	0
chr7	108094350	108096303	108094464	17	0	4.44089e-16	NM_007356	LAMB4	0
chr4	109353126	109356560	109356557	17	0	4.44089e-16	NM_001039778	ZCCHC23	-36991
chr16	89917663	89921917	89918704	17	0	4.44089e-16	NM_002386	MC1R	0
chr5	150701160	150701255	150701160	18	0	4.44089e-16	NM_018047	RBM22	-53
chr10	102853910	102856228	102854656	17	0	4.44089e-16	NR_037644	BORCS7-ASMT	0
chr3	197880259	197883747	197880558	17	0	4.44089e-16	NM_001134435	IQCG	5328
chr14	104857523	104857646	104857562	18	0	4.44089e-16	NM_001112726	CEP170B	7667
chr5	14444268	14444438	14444425	17	0	4.44089e-16	NM_007118	TRIO	0
chr3	105866907	105870050	105867863	18	0	4.44089e-16	NM_001321807	CBLB	0
chr22	40051661	40051774	40051661	17	0	4.44089e-16	NM_001024843	TNRC6B	0
chr1	52662661	52662874	52662859	17	0	4.44089e-16	NR_135156	FAM159A	0
chr8	20266426	20272877	20268809	17	0	4.44089e-16	NR_047509	LZTS1-AS1	2896
chr21	29024886	29025439	29024886	18	0	4.44089e-16	NM_001001992	USP16	0
chr2	151261131	151264513	151262113	18	0	4.44089e-16	NM_198557	RBM43	0
chr9	85940338	85944962	85940338	17	0	4.44089e-16	NM_001321881	NAA35	0
chr17	8186469	8192997	8190417	18	0	4.44089e-16	NR_039746	MIR4521	0
chr13	28137142	28139912	28138141	18	0	4.44089e-16	NR_029383	PAN3-AS1	0
chr3	129160513	129162917	129160513	17	0	4.44089e-16	NM_001204890	ISY1-RAB43	0
chr2	215996606	215998916	215998875	18	0	4.44089e-16	NM_018000	MREG	0
chr21	46286754	46287211	46286888	18	0	4.44089e-16	NM_001006114	YBEY	0
chr9	113410309	113411690	113410309	18	0	4.44089e-16	NM_017443	POLE3	0
chr2	135050705	135053336	135052012	18	0	4.44089e-16	NM_001172435	RAB3GAP1	0
chr17	5368067	5368147	5368069	17	0	4.44089e-16	NM_001083585	RABEP1	0
chr2	200379088	200385689	200383918	18	0	4.44089e-16	NM_001282735	SPATS2L	0
chr19	1851433	1858561	1853546	18	0	4.44089e-16	NM_031918	KLF16	0
chr8	29178077	29178844	29178557	17	0	4.44089e-16	NM_015254	KIF13B	0
chr5	82277860	82281766	82279243	18	0	4.44089e-16	NM_001025	RPS23	0
chr13	75648593	75648672	75648593	17	0	4.44089e-16	NM_005358	LMO7	0
chr20	63229816	63236827	63236824	17	0	4.44089e-16	NM_022161	BIRC7	0
chr2	85353794	85355350	85354628	18	0	4.44089e-16	NM_017750	RETSAT	0
chr19	14078540	14081646	14081527	18	0	4.44089e-16	NM_001277378	C19orf67	0
chr17	28643879	28648544	28644083	18	0	4.44089e-16	NM_014680	KIAA0100	0
chr2	69829194	69829488	69829236	17	0	4.44089e-16	NM_178439	GMCL1	118
chr20	54093485	54093915	54093677	20	0	5.55112e-16	NM_001316361	BCAS1	-22720
chr12	122523886	122527917	122527252	27	0	5.55112e-16	NM_023012	RSRC2	0
chr15	55196382	55197841	55197433	24	0	9.99201e-16	NM_016304	RSL24D1	0
chr5	75336335	75339286	75337240	21	0	1.22125e-15	NM_001130996	HMGCR	0
chr7	140900079	140904368	140902513	29	1	1.33227e-15	NM_004333	BRAF	0
chr6	20680573	20681175	20681001	29	1	1.33227e-15	NM_017774	CDKAL1	0
chr17	28948983	28952835	28949518	29	1	1.33227e-15	NM_001033561	PHF12	0
chr6	132812365	132815325	132814256	29	1	1.33227e-15	NM_001016	RPS12	0
chr8	145001305	145005301	145001810	22	0	1.66533e-15	NR_023392	ZNF252P	0
chr17	42453448	42460230	42457564	27	0	1.88738e-15	NM_001130020	ATP6V0A1	0
chr19	41262484	41264444	41263878	47	4	2.33147e-15	NM_144732	HNRNPUL1	0
chr17	39450591	39453185	39451422	47	4	2.33147e-15	NM_004774	MED1	0
chr1	17437499	17443614	17439663	59	6	2.44249e-15	NM_018715	RCC2	0
chr5	149341767	149347244	149345473	30	1	2.44249e-15	NM_152406	AFAP1L1	0
chr9	6756808	6759277	6757109	33	1	3.33067e-15	NM_001146696	KDM4C	0
chr15	35494809	35495530	35495527	19	0	4.77396e-15	NM_080650	DPH6	0
chr18	26089717	26091522	26091482	17	0	5.10703e-15	NM_001007559	SS18	0
chr17	47188668	47189254	47189251	17	0	6.21725e-15	NR_148340	CDC27	0
chr3	80766784	80773481	80770807	56	6	7.32747e-15	NR_147143	LINC02050	0
chr3	113515155	113515325	113515318	18	0	7.43849e-15	NM_144718	SPICE1	0
chr12	56358065	56361156	56360966	22	0	7.43849e-15	NM_005419	STAT2	0
chr8	116873402	116875298	116875105	20	0	7.66054e-15	NM_006265	RAD21	0
chr10	101060724	101060744	101060724	18	0	9.54792e-15	NM_030929	KAZALD1	498
chr21	36112496	36114222	36112707	21	0	9.99201e-15	NR_040084	LOC100133286	0
chr2	73925664	73931643	73927421	40	3	1.27676e-14	NR_134898	DGUOK	0
chr7	138459073	138461794	138459870	29	0	1.53211e-14	NM_015905	TRIM24	0
chr11	36008684	36012591	36008871	28	1	2.0095e-14	NM_001304264	LDLRAD3	0
chr1	214602662	214603084	214602843	27	1	2.0095e-14	NM_016343	CENPF	105
chr19	11375102	11377263	11375455	27	1	2.0095e-14	NM_175871	SWSAP1	0
chr3	19888724	19889518	19889358	27	1	2.0095e-14	NM_144715	EFHB	0
chr16	84116197	84117544	84116265	28	1	2.0095e-14	NM_003791	MBTPS1	0
chr5	160400180	160400310	160400291	19	0	2.24265e-14	NM_001303251	ZBED8	-83
chr10	1040166	1043870	1040202	15	0	2.35367e-14	NR_024628	IDI2-AS1	0
chr10	13987733	13988098	13987812	16	0	2.35367e-14	NM_018027	FRMD4A	0
chr12	109052092	109053385	109053382	15	0	2.35367e-14	NM_001301175	USP30	0
chr1	1572108	1576892	1574069	16	0	2.35367e-14	NM_014188	SSU72	0
chr12	56644717	56646633	56646532	16	0	2.35367e-14	NM_001686	ATP5B	0
chr19	47742586	47746016	47745238	15	0	2.35367e-14	NM_014601	EHD2	0
chr6	109687173	109692293	109691100	15	0	2.35367e-14	NM_001145128	AK9	0
chr2	169584147	169586727	169584861	15	0	2.35367e-14	NM_004792	PPIG	0
chr6	26473652	26475383	26473779	16	0	2.35367e-14	NM_001197234	BTN2A1	0
chr2	43993175	43996783	43995234	15	0	2.35367e-14	NM_133259	LRPPRC	0
chr10	68900827	68901220	68901084	16	0	2.35367e-14	NM_024045	DDX50	58
chr15	74460899	74462490	74460942	15	0	2.35367e-14	NM_001286739	UBL7	0
chr17	31294913	31296643	31295434	16	0	2.35367e-14	NM_000267	NF1	0
chr12	57085834	57087593	57086771	15	0	2.35367e-14	NM_001330305	NAB2	1301
chr10	72354359	72354362	72354359	16	0	2.35367e-14	NM_001002762	DNAJB12	0
chr15	72314939	72320655	72316026	15	0	2.35367e-14	NM_001172684	CELF6	0
chr19	55475414	55477834	55477070	15	0	2.35367e-14	NM_033113	ZNF628	0
chr17	67826797	67830047	67826891	16	0	2.35367e-14	NM_004459	BPTF	0
chr9	128067724	128069726	128067850	15	0	2.35367e-14	NM_001330988	SLC25A25	0
chr17	68034995	68036353	68035310	16	0	2.35367e-14	NM_002266	KPNA2	0
chr19	14572344	14575927	14572344	15	0	2.35367e-14	NM_004146	NDUFB7	-267
chr11	93195246	93197437	93197244	16	0	2.35367e-14	NM_001286139	SLC36A4	0
chr12	98059240	98065006	98062755	16	0	2.35367e-14	NR_036189	MIR4303	-63792
chr12	6996009	7001117	7001114	15	0	2.35367e-14	NR_135131	EMG1	0
chr3	56756864	56758874	56758706	15	0	2.35367e-14	NM_001128616	ARHGEF3	0
chrX	120549587	120554638	120550653	15	0	2.35367e-14	NM_003588	CUL4B	0
chr12	120198020	120201843	120201840	15	0	2.35367e-14	NM_001002	RPLP0	0
chr15	83061031	83068014	83065624	16	0	2.35367e-14	NM_001011885	BTBD1	0
chr19	45715254	45717715	45717712	15	0	2.35367e-14	NM_001329632	FBXO46	0
chr9	128321584	128325662	128323943	15	0	2.35367e-14	NM_001329862	TRUB2	0
chr10	11823075	11824709	11824217	15	0	2.35367e-14	NM_153256	PROSER2	0
chr11	94802276	94802938	94802935	16	0	2.35367e-14	NM_001301007	AMOTL1	0
chr10	13345962	13349876	13347103	16	0	2.35367e-14	NM_001195602	SEPHS1	0
chr12	55825488	55832009	55829763	16	0	2.35367e-14	NM_032364	DNAJC14	0
chr12	56589655	56592269	56592157	16	0	2.35367e-14	NM_002898	RBMS2	0
chr17	3667904	3669839	3668602	15	0	2.35367e-14	NM_001204698	TAX1BP3	0
chr6	42563851	42565523	42565520	15	0	2.35367e-14	NM_015255	UBR2	0
chr17	4794342	4799020	4795480	16	0	2.35367e-14	NM_001270481	PSMB6	0
chr3	52402404	52407267	52403746	15	0	2.35367e-14	NM_004656	BAP1	0
chr17	72610980	72618677	72615023	16	0	2.35367e-14	NR_033876	LINC00511	0
chr11	85627297	85629015	85628768	15	0	2.35367e-14	NM_001351274	DLG2	0
chr15	69721517	69721656	69721653	15	0	2.35367e-14	NR_126438	PCAT29	-25766
chr10	103395073	103397446	103395663	16	0	2.35367e-14	NM_001206426	USMG5	0
chr3	19945963	19951879	19946537	16	0	2.35367e-14	NM_001330688	EFHB	0
chr2	233868304	233868645	233868505	15	0	2.35367e-14	NR_024322	MSL3P1	0
chr17	59892858	59897128	59892858	15	0	2.35367e-14	NM_001193610	TUBD1	0
chr12	31462030	31466921	31466747	16	0	2.35367e-14	NM_001308339	DENND5B	0
chrX	54528886	54530068	54530002	16	0	2.35367e-14	NM_019067	GNL3L	143
chr5	81081829	81081842	81081839	15	0	2.35367e-14	NM_006909	RASGRF2	0
chr16	807225	807228	807225	16	0	2.35367e-14	NM_001013638	PRR25	0
chr5	79612087	79614649	79612275	16	0	2.35367e-14	NM_173797	PAPD4	0
chr19	1270071	1273848	1270071	16	0	2.35367e-14	NR_027271	CIRBP-AS1	0
chr3	23946554	23950372	23950368	15	0	2.35367e-14	NR_110524	NR1D2	0
chr18	48806250	48809279	48806911	16	0	2.35367e-14	NM_014772	CTIF	0
chr3	186077565	186083999	186080301	15	0	2.35367e-14	NM_004454	ETV5	0
chr8	55771785	55776909	55773847	15	0	2.35367e-14	NM_001286661	TMEM68	0
chr2	74472508	74473304	74473114	15	0	2.35367e-14	NM_053050	MRPL53	0
chr7	100425706	100429653	100429641	16	0	2.35367e-14	NM_001258008	ZCWPW1	0
chr8	66440845	66446860	66445876	16	0	2.35367e-14	NM_144650	ADHFE1	0
chr3	113696928	113697037	113697034	15	0	2.35367e-14	NM_001009899	USF3	-282
chr8	94059401	94065236	94061229	15	0	2.35367e-14	NM_004063	CDH17	61930
chr5	73938268	73940600	73940597	15	0	2.35367e-14	NM_001177693	ARHGEF28	0
chr13	42271786	42273339	42271931	16	0	2.35367e-14	NM_016248	AKAP11	0
chr14	73177817	73180845	73180368	16	0	2.35367e-14	NM_000021	PSEN1	0
chr13	97221549	97224955	97222562	16	0	2.35367e-14	NM_001306070	MBNL2	0
chr11	59611555	59616497	59616494	15	0	2.35367e-14	NM_002556	OSBP	0
chr22	38158904	38159432	38158904	15	0	2.35367e-14	NM_001349869	PLA2G6	0
chr16	4615840	4616920	4615972	16	0	2.35367e-14	NM_145253	UBALD1	-914
chr14	22870977	22871614	22871130	15	0	2.35367e-14	NM_014045	LRP10	103
chr7	134646323	134647581	134647578	15	0	2.35367e-14	NM_001293085	BPGM	0
chr16	30354004	30355577	30355574	15	0	2.35367e-14	NM_001243646	CD2BP2	0
chr11	64916668	64917874	64917436	16	0	2.35367e-14	NM_015104	ATG2A	0
chr18	59787997	59788573	59788570	15	0	2.35367e-14	NM_133459	CCBE1	-90585
chr16	23640583	23642375	23640834	16	0	2.35367e-14	NM_024675	PALB2	0
chr13	112722943	112723036	112722983	15	0	2.35367e-14	NM_015205	ATP11A	0
chr14	67426056	67426475	67426146	15	0	2.35367e-14	NM_016445	PLEK2	-13856
chr11	65040420	65042900	65040967	15	0	2.35367e-14	NR_037650	ARL2-SNX15	0
chr7	149193442	149196360	149195291	16	0	2.35367e-14	NM_001303481	ZNF282	0
chr5	145946391	145949729	145947172	15	0	2.35367e-14	NM_152550	SH3RF2	0
chr5	160007089	160011405	160008431	16	0	2.35367e-14	NM_001282500	TTC1	0
chr8	11787910	11788179	11788111	15	0	2.35367e-14	NM_001135747	NEIL2	-555
chr1	212036145	212039285	212037022	15	0	2.35367e-14	NM_001286229	DTL	0
chr11	33155191	33162046	33159185	16	0	2.35367e-14	NM_001326	CSTF3	0
chr1	28643235	28643295	28643235	15	0	2.35367e-14	NR_146731	LINC01715	0
chr1	202953015	202953018	202953015	15	0	2.35367e-14	NM_001290553	ADIPOR1	0
chr7	38177633	38180225	38177990	15	0	2.35367e-14	NM_032016	STARD3NL	0
chr2	230711713	230718264	230714279	15	0	2.35367e-14	NM_016289	CAB39	0
chr19	9621187	9621817	9621814	15	0	2.35367e-14	NM_001330365	ZNF561	0
chr17	58691954	58699408	58696463	16	0	2.35367e-14	NM_001201457	TEX14	0
chr19	56312459	56316476	56315247	16	0	2.35367e-14	NM_001322075	ZSCAN5A	0
chr20	23418273	23421697	23420222	15	0	2.35367e-14	NM_001283020	NAPB	0
chr3	185253372	185254584	185254226	16	0	2.35367e-14	NM_001166415	EHHADH	0
chr11	268814	273897	268814	15	0	2.35367e-14	NM_001276700	NLRP6	4673
chr19	9767615	9769083	9768783	15	0	2.35367e-14	NM_001077624	ZNF846	0
chr12	2811994	2813744	2812319	15	0	2.35367e-14	NR_146317	ITFG2-AS1	0
chr1	92298385	92301093	92298385	15	0	2.35367e-14	NM_001319683	GLMN	0
chr11	69330393	69330694	69330393	16	0	2.35367e-14	NM_001293294	MYEOV	-33106
chr3	131494704	131498327	131494776	16	0	2.35367e-14	NM_007208	MRPL3	0
chr17	63773896	63775662	63773896	16	0	2.35367e-14	NM_203499	DDX42	0
chr20	34065351	34070067	34070064	15	0	2.35367e-14	NM_007367	RALY	0
chr7	1567353	1571465	1569363	16	0	2.35367e-14	NM_032302	PSMG3	0
chr1	185317782	185319920	185318837	16	0	2.35367e-14	NM_006469	IVNS1ABP	-453
chrX	41522743	41522955	41522781	16	0	2.35367e-14	NM_001126055	CASK	0
chr5	6632618	6638551	6632618	15	0	2.35367e-14	NM_001193455	NSUN2	0
chr9	23825899	23827261	23825899	15	0	2.35367e-14	NM_001351472	ELAVL2	0
chr1	231338171	231338174	231338171	15	0	2.35367e-14	NM_001010984	SPRTN	0
chr18	8943961	8946636	8943961	15	0	2.35367e-14	NM_015210	MTCL1	-111184
chrX	54440082	54440240	54440237	16	0	2.35367e-14	NM_001346789	TSR2	135
chr3	37662894	37663084	37663043	15	0	2.35367e-14	NM_002207	ITGA9	0
chr6	155491024	155493955	155493607	15	0	2.35367e-14	NR_134596	LOC105378068	20889
chr10	123008209	123008734	123008731	15	0	2.35367e-14	NM_001271840	IKZF5	0
chr20	62121708	62123411	62121709	32	0	2.90878e-14	NM_144703	LSM14B	0
chr3	115145785	115148515	115147887	19	0	3.13083e-14	NM_015642	ZBTB20	0
chr1	149884532	149889040	149888184	29	1	3.18634e-14	NM_003528	HIST2H2BE	0
chr19	45424053	45424876	45424722	30	1	3.91909e-14	NM_001983	ERCC1	-134
chr17	43360247	43362464	43361093	54	6	4.01901e-14	NR_027412	LINC00910	7381
chr2	74454452	74457930	74456830	22	0	4.05231e-14	NM_031288	INO80B	0
chr14	51607706	51607760	51607729	19	0	7.32747e-14	NM_001042481	FRMD6	0
chr3	128800611	128804606	128801107	27	0	7.78266e-14	NM_004637	RAB7A	0
chr1	154983080	154984117	154983558	29	1	8.04912e-14	NM_001184892	FLAD1	0
chr2	37230699	37230992	37230989	17	0	9.07052e-14	NM_005760	CEBPZ	0
chr4	145066000	145066495	145066297	19	0	9.50351e-14	NM_001318367	ANAPC10	0
chr6	42217047	42218550	42217749	20	0	1.02029e-13	NM_018141	MRPS10	0
chr8	94550193	94554936	94553401	33	0	1.07248e-13	NM_015496	VIRMA	0
chr7	123747216	123750365	123748158	29	0	1.17795e-13	NM_003941	WASL	0
chr5	134149530	134149863	134149697	21	0	1.20237e-13	NM_003202	TCF7	-1301
chr12	89521905	89528728	89526309	24	0	1.2379e-13	NR_037660	POC1B	0
chr17	44501680	44503940	44503767	20	0	1.4222e-13	NM_001002909	GPATCH8	0
chr3	98970968	98972871	98972012	19	0	1.44884e-13	NM_080927	DCBLD2	-69279
chr8	124472031	124474614	124472574	19	0	1.97842e-13	NR_108047	RNF139-AS1	0
chr7	107166256	107170276	107168536	52	6	2.15494e-13	NM_001244262	HBP1	0
chr1	145926525	145929794	145927722	23	0	2.39364e-13	NM_005105	RBM8A	0
chr4	77861869	77863323	77862404	65	9	2.48468e-13	NM_020236	MRPL1	0
chr21	33541451	33543739	33542727	19	0	2.71116e-13	NM_001136006	GART	0
chr3	171001905	171002875	171002087	25	1	2.86327e-13	NM_000340	SLC2A2	0
chr6	42928675	42929057	42929054	26	1	2.86327e-13	NR_134881	CNPY3	0
chr15	79924183	79924350	79924199	25	1	2.86327e-13	NR_028330	ST20-AS1	0
chr4	183132367	183137051	183132415	26	1	2.86327e-13	NM_024949	WWC2	0
chr3	120741210	120743344	120742072	25	1	2.86327e-13	NM_173825	RABL3	0
chr22	38177901	38182764	38181336	26	1	2.86327e-13	NM_001349869	PLA2G6	0
chr12	6661601	6663691	6663196	31	1	3.05533e-13	NM_001127585	ING4	0
chr2	169573420	169574335	169574029	19	0	3.10529e-13	NR_104020	FASTKD1	0
chr10	101817648	101818785	101818782	17	0	3.55382e-13	NM_001142434	MGEA5	0
chr15	92804334	92804366	92804363	15	0	3.93352e-13	NR_033769	ASB9P1	-7226
chr1	244966286	244971371	244971084	25	1	3.95239e-13	NR_111907	LOC101928068	0
chr6	159790067	159790911	159790299	27	1	3.97016e-13	NR_134864	MRPL18	0
chr1	50968710	50971527	50970606	18	0	4.05453e-13	NM_001262	CDKN2C	0
chr4	85477724	85478629	85478265	18	0	4.67626e-13	NM_001025616	ARHGAP24	0
chr12	121686851	121689035	121686921	19	0	4.85278e-13	NM_173855	MORN3	-17197
chr10	73252719	73253201	73252719	15	0	5.40012e-13	NR_038373	DNAJC9-AS1	0
chr3	106004129	106004567	106004284	21	0	5.88529e-13	NM_001321790	CBLB	-134707
chr12	56298439	56302520	56300591	23	0	6.90004e-13	NM_004077	CS	0
chr3	14651220	14653583	14651390	53	2	6.91891e-13	NM_016474	CCDC174	0
chr2	12284985	12287480	12287138	38	3	7.55063e-13	NR_110196	MIR3681HG	0
chr6	28266944	28267576	28267437	18	0	9.60232e-13	NM_001023560	ZSCAN26	0
chr10	118341591	118343651	118341918	19	0	9.91096e-13	NM_001134672	FAM204A	0
chr19	48203580	48204553	48203828	16	0	1.02951e-12	NM_001351787	CARD8	0
chr10	78029695	78034553	78029848	35	1	1.15707e-12	NM_001026	RPS24	0
chr11	62787858	62792152	62792149	14	0	1.17872e-12	NM_199337	TMEM179B	0
chr12	43662808	43662985	43662808	14	0	1.17872e-12	NM_001098615	PUS7L	65624
chr10	75401808	75401927	75401924	14	0	1.17872e-12	NR_120651	ZNF503	0
chr4	2243503	2245218	2243503	14	0	1.17872e-12	NM_181808	POLN	-1339
chr3	196757876	196758480	196757963	14	0	1.17872e-12	NM_002577	PAK2	0
chr12	948666	952321	949201	14	0	1.17872e-12	NM_001297421	RAD52	0
chr11	65027669	65030818	65027755	14	0	1.17872e-12	NR_037650	ARL2-SNX15	0
chr1	212315457	212319131	212315457	14	0	1.17872e-12	NM_006243	PPP2R5A	0
chr4	1309323	1309326	1309323	14	0	1.17872e-12	NM_001017405	MAEA	0
chr1	228139645	228143288	228141367	14	0	1.17872e-12	NM_001242839	GUK1	0
chr11	18310905	18313625	18312929	14	0	1.17872e-12	NM_181508	HPS5	0
chr3	129180936	129185011	129184839	14	0	1.17872e-12	NM_001127192	CNBP	0
chr17	81917543	81918278	81918275	14	0	1.17872e-12	NM_016538	SIRT7	0
chr19	12610454	12611611	12611548	14	0	1.17872e-12	NM_020714	ZNF490	0
chr11	88119838	88123031	88119838	14	0	1.17872e-12	NM_022337	RAB38	0
chr17	42997662	43000761	42997677	14	0	1.17872e-12	NM_001349921	RPL27	0
chr11	70518250	70519357	70518250	14	0	1.17872e-12	NM_133266	SHANK2	0
chr1	220300349	220301931	220300554	14	0	1.17872e-12	NM_012414	RAB3GAP2	-27848
chr1	225774938	225779327	225777864	14	0	1.17872e-12	NM_001130440	SRP9	0
chr2	68466329	68468543	68467483	14	0	1.17872e-12	NM_001024680	FBXO48	0
chrX	49002562	49003314	49002580	14	0	1.17872e-12	NM_020137	GRIPAP1	-298
chr3	16140738	16144147	16140752	14	0	1.17872e-12	NM_001319051	GALNT15	30175
chr2	127409580	127414108	127411283	14	0	1.17872e-12	NM_000312	PROC	4312
chr15	100601371	100603482	100601742	14	0	1.17872e-12	NM_001040616	LINS1	0
chr7	133080307	133085416	133082564	14	0	1.17872e-12	NR_133671	CHCHD3	0
chr16	84599429	84606203	84602556	14	0	1.17872e-12	NM_021149	COTL1	0
chr21	38121273	38121338	38121335	14	0	1.17872e-12	NR_147130	DSCR4	0
chr6	4356128	4357039	4357036	14	0	1.17872e-12	NR_106988	MIR7641-2	70963
chr15	92879998	92885523	92882844	14	0	1.17872e-12	NR_037601	LINC01578	0
chr6	8814890	8815830	8815056	14	0	1.17872e-12	NR_038980	LOC100506207	-29445
chr6	158853595	158853910	158853595	14	0	1.17872e-12	NR_028496	OSTCP1	0
chr16	28949673	28952253	28950586	14	0	1.17872e-12	NM_032815	NFATC2IP	0
chr6	152034675	152034781	152034778	14	0	1.17872e-12	NM_001122742	ESR1	0
chr16	89507276	89508894	89508891	14	0	1.17872e-12	NM_199367	SPG7	0
chr7	155457034	155457214	155457142	14	0	1.17872e-12	NM_001427	EN2	915
chr1	15218402	15224432	15218505	14	0	1.17872e-12	NM_001136216	TMEM51	0
chr8	132774504	132776292	132774796	14	0	1.17872e-12	NM_198513	PHF20L1	0
chr8	130257611	130262771	130259459	14	0	1.17872e-12	NM_001247996	ASAP1	0
chr22	43183923	43188126	43188033	14	0	1.17872e-12	NM_015140	TTLL12	0
chr2	231349360	231351424	231351421	14	0	1.17872e-12	NM_001352754	ARMC9	0
chr21	16308523	16308615	16308612	14	0	1.17872e-12	NR_136541	MIR99AHG	0
chr5	80653948	80655866	80655191	14	0	1.17872e-12	NR_110936	DHFR	0
chr8	33512249	33514036	33513455	14	0	1.17872e-12	NM_001330505	TTI2	0
chr14	31021181	31021460	31021305	14	0	1.17872e-12	NM_014574	STRN3	0
chr14	39098943	39103333	39103330	14	0	1.17872e-12	NM_006364	SEC23A	0
chr5	141035860	141041083	141040485	14	0	1.17872e-12	NR_105056	LOC101926905	5122
chr7	99437238	99444618	99441735	14	0	1.17872e-12	NM_015545	PTCD1	0
chr6	151449612	151453781	151450982	14	0	1.17872e-12	NM_001271937	RMND1	0
chr7	99124932	99128314	99128182	14	0	1.17872e-12	NM_181349	SMURF1	0
chr7	129047803	129050857	129047829	14	0	1.17872e-12	NM_001191028	TNPO3	0
chr16	71894424	71895865	71895281	14	0	1.17872e-12	NM_001270976	IST1	0
chr8	86508305	86511872	86508428	14	0	1.17872e-12	NM_016033	RMDN1	0
chr20	38961606	38966053	38962628	14	0	1.17872e-12	NM_021931	DHX35	0
chr1	85628175	85629547	85629049	14	0	1.17872e-12	NM_001170670	ZNHIT6	19876
chr20	35307920	35312674	35312623	14	0	1.17872e-12	NM_001184977	UQCC1	0
chr14	54165893	54172287	54169330	14	0	1.17872e-12	NM_130850	BMP4	-209002
chr13	45463421	45464850	45464847	14	0	1.17872e-12	NM_031431	COG3	45
chr6	151036267	151036725	151036722	14	0	1.17872e-12	NM_001242767	MTHFD1L	0
chr8	26382548	26388170	26384000	14	0	1.17872e-12	NR_144550	SDAD1P1	0
chr1	155308390	155308490	155308390	14	0	1.17872e-12	NM_001135822	FDPS	258
chr4	122151944	122153245	122152050	14	0	1.17872e-12	NM_015312	KIAA1109	17358
chr15	45277683	45281857	45279672	14	0	1.17872e-12	NR_120335	LOC101928414	0
chr19	40346907	40349663	40347516	14	0	1.17872e-12	NM_001256441	C19orf47	0
chr6	149044264	149047144	149047141	14	0	1.17872e-12	NM_005715	UST	0
chr15	40078965	40082050	40081987	14	0	1.17872e-12	NM_001003943	BMF	5841
chr9	134135264	134135956	134135915	14	0	1.17872e-12	NM_017588	WDR5	132
chrX	119851670	119855559	119853918	14	0	1.17872e-12	NM_023010	UPF3B	0
chr17	19972203	19976914	19972203	14	0	1.17872e-12	NM_001330152	AKAP10	0
chr19	45404375	45406371	45406252	14	0	1.17872e-12	NM_001142502	PPP1R13L	0
chr10	32343172	32348592	32347999	14	0	1.17872e-12	NM_001272019	EPC1	0
chr17	28718755	28723176	28719868	14	0	1.17872e-12	NM_000984	RPL23A	0
chr6	116570349	116571962	116571422	14	0	1.17872e-12	NM_001007464	RWDD1	0
chr6	19552406	19557499	19552406	14	0	1.17872e-12	NR_134615	LOC105374960	-93058
chr2	169794910	169798974	169798726	14	0	1.17872e-12	NM_003142	SSB	0
chr12	94456818	94459600	94459074	14	0	1.17872e-12	NM_001346457	CEP83	0
chr19	47348574	47350112	47350109	14	0	1.17872e-12	NM_014681	DHX34	0
chr9	89318247	89321808	89318949	14	0	1.17872e-12	NM_024077	SECISBP2	0
chr19	52638026	52638293	52638026	14	0	1.17872e-12	NM_001348018	ZNF83	0
chrX	65534908	65535275	65535272	14	0	1.17872e-12	NM_001170649	LAS1L	-102
chr12	116819888	116820111	116820076	14	0	1.17872e-12	NM_001109903	RNFT2	0
chr17	6640772	6642338	6641071	14	0	1.17872e-12	NM_001351225	KIAA0753	0
chr1	2232191	2234779	2233002	14	0	1.17872e-12	NM_003036	SKI	0
chr10	73494253	73496125	73496122	14	0	1.17872e-12	NM_001142353	PPP3CB	0
chr10	5547894	5548171	5548168	14	0	1.17872e-12	NM_005185	CALML3	-21626
chr12	111841170	111843038	111841170	14	0	1.17872e-12	NR_015404	MAPKAPK5-AS1	0
chrX	132480454	132480738	132480735	14	0	1.17872e-12	NM_001170704	MBNL3	0
chr6	16741315	16742090	16741315	14	0	1.17872e-12	NM_000332	ATXN1	0
chr2	150232617	150234562	150234243	14	0	1.17872e-12	NR_146972	LINC01817	330
chr15	59657058	59658453	59657782	14	0	1.17872e-12	NM_004492	GTF2A2	0
chr2	27354442	27356262	27355848	22	0	1.28098e-12	NM_001318909	GTF3C2	0
chr13	30615863	30620417	30620086	23	0	1.33349e-12	NM_001313893	HMGB1	0
chr22	36524909	36533562	36529548	52	3	1.59295e-12	NM_003753	EIF3D	0
chr12	4648995	4649592	4649393	15	0	1.60605e-12	NM_001278309	AKAP3	0
chr21	41758699	41761766	41761662	17	0	2.12419e-12	NM_020639	RIPK4	0
chr1	7960283	7964992	7962226	33	2	2.19014e-12	NM_001123377	PARK7	0
chr6	27146147	27146399	27146294	19	0	2.61424e-12	NM_080593	HIST1H2BK	0
chr4	153204082	153204612	153204436	15	0	2.69718e-12	NM_001351056	TRIM2	0
chr17	27292848	27294992	27294935	15	0	2.69718e-12	NR_039748	MIR4522	0
chr13	28181591	28181594	28181591	14	0	2.98228e-12	NM_175854	PAN3	0
chr1	113072689	113073066	113073062	16	0	3.04001e-12	NR_103777	LOC100996251	0
chr13	41004799	41009513	41004975	30	2	3.27938e-12	NM_172373	ELF1	0
chr20	35739575	35743387	35742038	31	2	3.27938e-12	NM_001242599	RBM39	0
chr8	56073627	56076604	56073882	30	2	3.27938e-12	NM_001146227	RPS20	0
chr3	119677450	119678915	119677594	18	0	3.73612e-12	NM_005694	COX17	-54
chr11	32583549	32584353	32584350	15	0	3.83249e-12	NM_001307929	EIF3M	0
chr7	130050971	130051668	130051521	24	1	3.83493e-12	NM_001282190	ZC3HC1	0
chr1	232949720	232950440	232950218	24	1	3.83493e-12	NM_001329452	NTPCR	91
chr20	57006764	57007442	57007357	24	1	3.83493e-12	NM_001719	BMP7	161311
chr1	15337764	15338211	15337766	24	1	3.83493e-12	NM_052929	FHAD1	0
chr15	58987263	58991346	58987605	24	1	3.83493e-12	NM_001330331	RNF111	0
chrX	71532415	71535605	71532848	40	2	4.39027e-12	NM_181672	OGT	0
chr1	213014187	213016854	213015961	41	3	4.39027e-12	NM_001300755	ANGEL2	0
chr11	68460206	68462896	68462861	19	0	4.71989e-12	NM_001352379	PPP6R3	0
chr5	172179712	172179715	172179712	14	0	4.78284e-12	NM_005990	STK10	0
chr3	40452588	40458234	40456946	65	10	5.28044e-12	NR_040100	ENTPD3-AS1	0
chr14	45252087	45254455	45252963	35	1	5.46252e-12	NM_018353	MIS18BP1	0
chr15	98666552	98671869	98671762	25	1	5.8733e-12	NM_000875	IGF1R	0
chr4	184805915	184812720	184808501	25	1	6.92846e-12	NM_001286712	ACSL1	0
chr5	31530405	31533471	31532101	24	0	7.17904e-12	NM_001100412	DROSHA	0
chr11	46617049	46618363	46617622	15	0	7.26652e-12	NM_173811	HARBI1	0
chr8	134892662	134893315	134892978	16	0	7.52243e-12	NR_125427	LOC101927845	-10763
chr12	3871115	3876618	3872945	26	1	8.66718e-12	NM_001286521	PARP11	0
chr3	14178725	14179798	14178893	15	0	9.22962e-12	NM_014463	LSM3	0
chr3	188469478	188469610	188469478	23	0	9.3312e-12	NM_001167672	LPP	0
chr19	49580391	49581270	49580918	16	0	9.83003e-12	NM_015953	NOSIP	0
chr2	27489543	27490007	27489543	14	0	1.01821e-11	NM_015662	IFT172	0
chr19	43753301	43760044	43759365	26	0	1.40649e-11	NM_019108	SMG9	0
chr11	12637135	12637370	12637367	14	0	1.42635e-11	NM_021961	TEAD1	37052
chr8	139214959	139216626	139215595	17	0	1.52715e-11	NM_152888	COL22A1	-300953
chr8	29522567	29523200	29522613	17	0	1.52715e-11	NM_001394	DUSP4	-171817
chr3	12663268	12667799	12664526	31	1	1.65461e-11	NM_002880	RAF1	0
chr5	95080450	95081959	95081670	16	0	1.66668e-11	NM_001002796	MCTP1	0
chr3	121545394	121546289	121546134	15	0	1.7182e-11	NM_199420	POLQ	0
chr11	18320753	18324431	18323038	18	0	2.00071e-11	NM_181508	HPS5	0
chr8	140588919	140593658	140589302	30	1	2.00171e-11	NM_012154	AGO2	0
chr11	57668293	57669363	57669079	18	0	2.34467e-11	NM_015457	ZDHHC5	0
chr19	6361454	6361457	6361454	14	0	2.51371e-11	NM_006012	CLPP	0
chr4	112823491	112824040	112823656	17	0	2.6496e-11	NM_001127493	ANK2	0
chr5	103118968	103121816	103120018	47	6	2.7531e-11	NR_134299	GIN1	0
chr12	93676940	93678669	93677379	48	3	2.7531e-11	NM_001320101	CRADD	0
chr6	90586074	90587910	90587372	29	2	2.85036e-11	NM_003188	MAP3K7	0
chr20	49657794	49662484	49661618	40	4	2.98991e-11	NM_004776	B4GALT5	0
chr8	135372323	135372960	135372957	24	1	3.21326e-11	NR_026706	LINC01591	-72604
chr12	15688166	15690052	15689647	17	0	3.36289e-11	NM_004447	EPS8	0
chr1	20781359	20788096	20785207	26	1	3.54544e-11	NM_016287	HP1BP3	0
chr14	89954181	89956601	89955589	34	3	3.78266e-11	NM_001284269	EFCAB11	0
chr8	27310476	27312017	27311700	15	0	3.79204e-11	NM_001304495	TRIM35	0
chr22	36481116	36484822	36482255	50	7	4.41567e-11	NM_012473	TXN2	0
chr3	229807	231012	230105	26	1	4.71769e-11	NM_001253387	CHL1	0
chr3	183234015	183234276	183234015	22	1	4.81933e-11	NM_015078	MCF2L2	0
chr7	45107780	45112733	45109454	22	1	4.81933e-11	NM_001261834	TBRG4	0
chr2	148019628	148027084	148020875	23	1	4.81933e-11	NM_002552	ORC4	0
chr6	96897242	96899152	96898425	22	1	4.81933e-11	NM_014165	NDUFAF4	0
chrX	48736996	48739155	48737456	23	1	4.81933e-11	NM_001080489	GLOD5	22595
chr6	36027445	36029614	36027595	22	1	4.81933e-11	NM_139013	MAPK14	0
chr15	78299240	78302602	78299980	23	1	4.81933e-11	NM_001303247	WDR61	0
chr2	63484082	63485071	63485017	23	1	4.81933e-11	NM_015910	WDPCP	0
chr15	64355170	64356685	64356250	23	1	4.81933e-11	NM_001329605	CSNK1G1	0
chrX	49190832	49191711	49191708	23	1	4.81933e-11	NM_003179	SYP	0
chr2	31319560	31319728	31319647	13	0	5.31616e-11	NM_000379	XDH	14594
chr2	55268656	55269800	55269589	13	0	5.31616e-11	NM_001321001	MTIF2	0
chr14	103819248	103820016	103820013	12	0	5.31616e-11	NM_015316	PPP1R13B	0
chr12	110073455	110074742	110073663	13	0	5.31616e-11	NM_207435	C12orf76	-5760
chr17	2348090	2348093	2348090	13	0	5.31616e-11	NM_014853	SGSM2	0
chr14	103332802	103338662	103333456	13	0	5.31616e-11	NM_001969	EIF5	0
chr12	22045771	22047512	22045785	13	0	5.31616e-11	NR_135117	CMAS	0
chr12	55730052	55730439	55730052	13	0	5.31616e-11	NM_001257389	CD63	-379
chr3	48837302	48840203	48840200	13	0	5.31616e-11	NM_001321982	PRKAR2A	0
chr2	53968346	53971669	53968721	13	0	5.31616e-11	NM_014614	PSME4	0
chr17	21126188	21130545	21128102	13	0	5.31616e-11	NM_015510	DHRS7B	0
chr3	52608943	52610291	52609682	12	0	5.31616e-11	NM_001350074	PBRM1	0
chr3	88611007	88613221	88613218	12	0	5.31616e-11	NM_173824	C3orf38	-453042
chr17	30831711	30834139	30831711	12	0	5.31616e-11	NM_024857	ATAD5	0
chr17	75181636	75183948	75181658	12	0	5.31616e-11	NM_006937	SUMO2	0
chr15	74695292	74696395	74696112	12	0	5.31616e-11	NM_025083	EDC3	0
chr12	69532876	69535805	69532876	13	0	5.31616e-11	NM_001278351	FRS2	0
chr17	34959671	34962693	34961745	13	0	5.31616e-11	NM_001193530	CCT6B	0
chr2	42326020	42328556	42328553	12	0	5.31616e-11	NM_001145076	EML4	0
chr17	74873193	74874067	74873997	13	0	5.31616e-11	NM_001258015	FDXR	-162
chr3	67779389	67784154	67784151	12	0	5.31616e-11	NR_109992	SUCLG2-AS1	0
chr17	39636952	39638986	39636952	12	0	5.31616e-11	NM_001165938	STARD3	0
chr12	93625023	93625395	93625268	13	0	5.31616e-11	NM_003877	SOCS2	-48278
chr12	7013971	7019167	7017676	13	0	5.31616e-11	NM_005768	LPCAT3	0
chr12	7188911	7189924	7189545	12	0	5.31616e-11	NM_001351124	PEX5	0
chr15	41620524	41622901	41622647	13	0	5.31616e-11	NM_001080541	MGA	37511
chr17	41688263	41689937	41689847	12	0	5.31616e-11	NM_005801	EIF1	0
chr15	88466488	88471883	88467516	13	0	5.31616e-11	NM_022163	MRPL46	0
chr12	106299505	106303545	106302785	12	0	5.31616e-11	NM_001286262	TCP11L2	0
chr15	33092485	33092793	33092485	13	0	5.31616e-11	NM_001277313	FMN1	0
chr3	134236626	134242739	134241384	13	0	5.31616e-11	NM_002958	RYK	0
chr3	11272866	11273163	11272879	13	0	5.31616e-11	NM_001349235	ATG7	0
chr2	11638707	11638818	11638761	12	0	5.31616e-11	NM_014668	GREB1	0
chr13	45141018	45143461	45142919	12	0	5.31616e-11	NM_004128	GTF2F2	0
chr16	69521867	69523344	69523150	12	0	5.31616e-11	NR_031719	MIR1538	42464
chr17	59703183	59709896	59706544	13	0	5.31616e-11	NM_016077	PTRH2	0
chr2	75661039	75668108	75664221	12	0	5.31616e-11	NM_014763	MRPL19	0
chr16	20863443	20866064	20865562	12	0	5.31616e-11	NM_173475	DCUN1D3	0
chr16	68724817	68729579	68729381	12	0	5.31616e-11	NM_001317184	CDH1	7711
chr16	67240553	67245490	67244567	12	0	5.31616e-11	NM_001318202	FHOD1	0
chr14	34981386	34983995	34982745	13	0	5.31616e-11	NM_003136	SRP54	0
chr12	52993111	52993539	52993111	12	0	5.31616e-11	NM_001300821	EIF4B	12719
chr14	32507369	32512817	32510023	13	0	5.31616e-11	NM_004274	AKAP6	0
chr16	27199908	27203439	27203436	12	0	5.31616e-11	NM_024773	KDM8	47
chr16	67100442	67100912	67100564	12	0	5.31616e-11	NM_001755	CBFB	0
chr2	100998932	101006730	100998932	13	0	5.31616e-11	NM_001099693	RPL31	0
chr16	29790107	29792065	29791781	12	0	5.31616e-11	NM_001256269	KIF22	0
chr6	43808295	43813279	43813276	12	0	5.31616e-11	NM_001025366	VEGFA	-21809
chr17	48101605	48103532	48101605	12	0	5.31616e-11	NM_001127228	CBX1	-84
chr13	113208615	113210574	113210439	12	0	5.31616e-11	NM_001258213	PCID2	0
chr12	48955057	48956945	48956439	13	0	5.31616e-11	NM_001659	ARF3	0
chr16	24982487	24987316	24987313	13	0	5.31616e-11	NM_001006634	ARHGAP17	0
chr12	123391739	123392271	123391979	12	0	5.31616e-11	NM_001324504	KMT5A	0
chr3	39051684	39055885	39051684	12	0	5.31616e-11	NM_001349253	SCN11A	0
chr14	67371478	67372306	67371711	13	0	5.31616e-11	NM_004094	EIF2S1	0
chr3	46957563	46961848	46957563	12	0	5.31616e-11	NR_102269	CCDC12	0
chr16	89240671	89245090	89241888	13	0	5.31616e-11	NR_037705	ZNF778	-11114
chr3	45567344	45567507	45567344	13	0	5.31616e-11	NM_015340	LARS2	-18508
chr17	64449074	64449077	64449074	12	0	5.31616e-11	NM_001085423	MILR1	38
chr3	12484127	12485372	12484127	12	0	5.31616e-11	NM_001145393	TSEN2	0
chr16	87848218	87853254	87848218	12	0	5.31616e-11	NM_003486	SLC7A5	0
chr13	21171800	21177525	21176064	13	0	5.31616e-11	NM_001166017	SKA3	0
chr2	200862695	200866515	200863462	12	0	5.31616e-11	NR_027856	CLK1	0
chr14	58725411	58725603	58725558	13	0	5.31616e-11	NR_046093	DACT1	-77091
chr13	21239973	21240802	21240334	13	0	5.31616e-11	NR_125745	LINC01046	-4769
chr13	24508170	24513010	24512199	12	0	5.31616e-11	NM_006437	PARP4	0
chr2	202493947	202494632	202494345	12	0	5.31616e-11	NM_001204	BMPR2	0
chr14	81530175	81534370	81534237	13	0	5.31616e-11	NM_005065	SEL1L	0
chr3	110814709	110814983	110814802	12	0	5.31616e-11	NR_045114	NECTIN3-AS1	230333
chr2	27427632	27432124	27432121	12	0	5.31616e-11	NM_001321357	NRBP1	0
chr14	77314258	77320150	77319871	13	0	5.31616e-11	NM_013382	POMT2	0
chr14	73949862	73950876	73950873	12	0	5.31616e-11	NM_152445	FAM161B	0
chr16	3822800	3824447	3822800	12	0	5.31616e-11	NM_001079846	CREBBP	0
chr3	129485764	129490753	129486126	13	0	5.31616e-11	NM_001280541	IFT122	0
chr12	62940822	62942423	62942420	12	0	5.31616e-11	NM_020700	PPM1H	-5937
chr6	44122681	44126707	44122795	12	0	5.31616e-11	NM_001318770	MRPL14	0
chr12	1743011	1745338	1743011	13	0	5.31616e-11	NM_024551	ADIPOR2	0
chr19	40440927	40444494	40443000	12	0	5.31616e-11	NM_203344	SERTAD3	0
chr1	156336026	156338947	156337991	13	0	5.31616e-11	NM_001008800	CCT3	0
chr9	132942926	132946404	132945678	13	0	5.31616e-11	NM_000368	TSC1	0
chr4	139300585	139304286	139301022	13	0	5.31616e-11	NM_001184986	NDUFC1	0
chr1	24926507	24929384	24927568	12	0	5.31616e-11	NM_001320672	RUNX3	0
chrX	3263004	3263649	3263185	13	0	5.31616e-11	NR_038428	LINC01546	8171
chr1	153963837	153967146	153966348	13	0	5.31616e-11	NM_014437	SLC39A1	0
chr9	132078494	132082373	132080062	13	0	5.31616e-11	NM_001253881	MED27	0
chr1	151983107	151985608	151984752	13	0	5.31616e-11	NM_002966	S100A10	0
chr4	143402716	143404298	143402795	12	0	5.31616e-11	NM_002039	GAB1	0
chr4	147588352	147590355	147590017	13	0	5.31616e-11	NM_018241	TMEM184C	27033
chr9	124766979	124771950	124771830	13	0	5.31616e-11	NM_001278546	NR6A1	0
chr5	169029882	169030630	169030254	12	0	5.31616e-11	NM_001271946	SLIT3	0
chr1	145824717	145824958	145824717	12	0	5.31616e-11	NM_006468	POLR3C	0
chr19	51904880	51905153	51904967	12	0	5.31616e-11	NM_023074	ZNF649	0
chr1	26999819	27001922	27001919	13	0	5.31616e-11	NM_001013642	TRNP1	0
chr1	120756579	120756598	120756579	12	0	5.31616e-11	NM_001351372	NBPF26	48958
chr1	116874009	116877980	116874009	13	0	5.31616e-11	NM_020440	PTGFRN	31943
chr22	41479907	41484137	41479907	12	0	5.31616e-11	NM_001098	ACO2	0
chr1	161165479	161166972	161166207	12	0	5.31616e-11	NM_001014443	USP21	0
chr10	21293173	21293813	21293595	12	0	5.31616e-11	NR_046283	NEBL-AS1	-118250
chr19	39436249	39440484	39440369	12	0	5.31616e-11	NM_001020	RPS16	-229
chr19	38374609	38375955	38374609	13	0	5.31616e-11	NM_002812	PSMD8	0
chr19	10650358	10655715	10651471	12	0	5.31616e-11	NR_024333	ILF3-AS1	0
chr10	103351256	103351540	103351537	12	0	5.31616e-11	NM_001011663	PCGF6	-122
chr19	12484995	12485640	12485555	12	0	5.31616e-11	NM_152601	ZNF709	-177
chr19	13116853	13117916	13117913	12	0	5.31616e-11	NM_001136035	TRMT1	-82
chr19	15138673	15142914	15140358	12	0	5.31616e-11	NM_006844	ILVBL	-12874
chr10	100263170	100267847	100267844	13	0	5.31616e-11	NM_001303405	CWF19L1	0
chr10	99730947	99734706	99731313	12	0	5.31616e-11	NM_001320974	COX15	0
chrX	44871700	44874724	44873056	12	0	5.31616e-11	NM_001291416	KDM6A	0
chr10	97495065	97498093	97497085	13	0	5.31616e-11	NM_001351356	MMS19	0
chr4	179486077	179488581	179486089	12	0	5.31616e-11	NR_028342	LINC01098	-1495327
chr19	16827827	16830414	16829280	12	0	5.31616e-11	NM_001297595	SIN3B	0
chr6	7312014	7313662	7313443	13	0	5.31616e-11	NM_001292008	SSR1	0
chr7	972732	981008	977946	12	0	5.31616e-11	NM_001031617	COX19	0
chr10	87816445	87818375	87818104	13	0	5.31616e-11	NM_001321968	ATAD1	0
chr19	29662413	29666802	29666799	12	0	5.31616e-11	NM_024310	PLEKHF1	0
chr10	72106115	72107526	72106559	13	0	5.31616e-11	NM_001198799	ASCC1	0
chr19	34676764	34677508	34677505	12	0	5.31616e-11	NR_027620	SCGB1B2P	0
chr10	69805517	69807388	69807385	13	0	5.31616e-11	NM_001130103	COL13A1	0
chrX	24054155	24055910	24054508	13	0	5.31616e-11	NM_001415	EIF2S3	0
chr1	165768292	165769370	165768292	12	0	5.31616e-11	NM_001256164	TMCO1	0
chr10	92573834	92574814	92574811	12	0	5.31616e-11	NM_001322793	IDE	0
chr6	161630641	161630961	161630958	13	0	5.31616e-11	NM_004562	PRKN	0
chr1	27870364	27875691	27875338	12	0	5.31616e-11	NM_004848	THEMIS2	0
chr19	53945734	53945770	53945767	12	0	5.31616e-11	NM_031896	CACNG7	-2019
chr20	38982525	38985233	38982525	12	0	5.31616e-11	NM_021931	DHX35	0
chr8	80201204	80202705	80201461	13	0	5.31616e-11	NR_105034	TPD52	-29545
chr20	43457054	43459610	43457517	13	0	5.31616e-11	NM_006275	SRSF6	0
chr8	65643858	65648380	65645285	12	0	5.31616e-11	NM_014637	MTFR1	0
chr22	30353951	30356469	30356109	13	0	5.31616e-11	NM_005877	SF3A1	0
chr1	40256243	40258820	40258817	13	0	5.31616e-11	NM_005857	ZMPSTE24	0
chr5	138337281	138338238	138337426	13	0	5.31616e-11	NM_001318098	CDC25C	0
chr22	27821257	27821469	27821466	13	0	5.31616e-11	NM_002430	MN1	-19759
chr20	49638936	49644253	49640478	12	0	5.31616e-11	NM_004776	B4GALT5	0
chr7	123556382	123557953	123556382	12	0	5.31616e-11	NR_111925	NDUFA5	0
chr5	67301272	67302008	67301611	13	0	5.31616e-11	NM_005582	CD180	-104483
chr7	129053623	129055965	129054284	13	0	5.31616e-11	NM_001191028	TNPO3	0
chr20	56148725	56148783	56148780	13	0	5.31616e-11	NM_019888	MC3R	99949
chr8	28657688	28660542	28659748	12	0	5.31616e-11	NR_126027	EXTL3-AS1	37861
chr5	127892492	127892960	127892951	13	0	5.31616e-11	NM_001317938	CCDC192	0
chr7	135254278	135254281	135254278	12	0	5.31616e-11	NM_182489	STRA8	0
chr1	55236042	55236138	55236042	13	0	5.31616e-11	NR_146283	MIR4422HG	-1865
chr8	17051248	17052802	17051503	12	0	5.31616e-11	NM_001349810	MICU3	0
chr7	139627116	139629414	139627197	12	0	5.31616e-11	NM_001113239	HIPK2	0
chr20	38275989	38275992	38275989	13	0	5.31616e-11	NR_104170	LOC149684	0
chr22	31247644	31251332	31247725	12	0	5.31616e-11	NM_005569	LIMK2	0
chr1	37690457	37693128	37691379	13	0	5.31616e-11	NM_001303030	C1orf109	0
chr5	41903578	41904783	41903578	13	0	5.31616e-11	NM_175921	C5orf51	0
chr19	55173995	55176585	55174336	13	0	5.31616e-11	NM_001297774	SYT5	0
chr9	73544999	73548565	73548520	12	0	5.31616e-11	NM_000700	ANXA1	-374605
chr7	73308284	73309624	73308284	12	0	5.31616e-11	NM_001168348	NSUN5	0
chr4	184795374	184796329	184795552	12	0	5.31616e-11	NM_001286710	ACSL1	0
chr1	30061625	30061695	30061625	13	0	5.31616e-11	NR_110790	LINC01648	-24013
chr9	27569337	27574134	27573947	12	0	5.31616e-11	NM_001256054	C9orf72	0
chr20	3819972	3820922	3820445	12	0	5.31616e-11	NM_001204446	AP5S1	0
chr5	149548181	149552990	149552279	13	0	5.31616e-11	NM_001892	CSNK1A1	0
chr1	248928094	248932573	248928143	12	0	5.31616e-11	NM_001017434	PGBD2	-8948
chr19	53037821	53037824	53037821	13	0	5.31616e-11	NM_001191055	ERVV-2	6914
chr7	92834329	92836086	92836083	12	0	5.31616e-11	NM_001145306	CDK6	0
chr5	149172043	149174456	149172824	12	0	5.31616e-11	NM_014945	ABLIM3	0
chr8	144079286	144081485	144079286	12	0	5.31616e-11	NM_019037	EXOSC4	0
chr8	141127421	141128011	141127578	13	0	5.31616e-11	NR_148197	DENND3	601
chr7	96478286	96480951	96478286	13	0	5.31616e-11	NM_001201450	SEM1	675
chr20	10715064	10719243	10715064	13	0	5.31616e-11	NR_110611	LINC01752	33847
chr1	93538752	93541402	93541094	13	0	5.31616e-11	NM_001024948	FNBP1L	0
chr20	31543633	31547571	31544364	13	0	5.31616e-11	NM_030789	HM13	0
chr8	123767564	123770455	123770325	13	0	5.31616e-11	NM_001317918	FAM91A1	0
chr8	123708188	123708702	123708699	12	0	5.31616e-11	NM_004306	ANXA13	0
chr1	32235947	32239022	32236470	13	0	5.31616e-11	NR_026850	MTMR9LP	0
chr4	48830539	48832499	48830684	12	0	5.31616e-11	NM_001079840	OCIAD1	0
chr9	133030209	133033076	133030786	12	0	5.31616e-11	NR_135119	LOC105376306	0
chr21	41751734	41754383	41752236	12	0	5.31616e-11	NM_020639	RIPK4	0
chr11	62652023	62657674	62654250	12	0	5.31616e-11	NM_030628	INTS5	0
chrX	75156340	75158656	75156340	13	0	5.31616e-11	NM_001271696	ABCB7	0
chr11	7577900	7578006	7578003	12	0	5.31616e-11	NM_003621	PPFIBP2	0
chr3	193592913	193596649	193592913	12	0	5.31616e-11	NM_130834	OPA1	0
chr11	16296347	16300008	16296695	12	0	5.31616e-11	NM_001145811	SOX6	0
chr6	109095350	109095406	109095403	12	0	5.31616e-11	NM_001350658	CEP57L1	0
chr11	96254433	96258395	96254433	13	0	5.31616e-11	NM_032427	MAML2	0
chr11	61361305	61362882	61362606	12	0	5.31616e-11	NM_001161454	CYB561A3	0
chr17	80856777	80856956	80856811	13	0	5.31616e-11	NM_020761	RPTOR	0
chr3	196867193	196868844	196867230	13	0	5.31616e-11	NM_001308045	SENP5	0
chrX	149937841	149938799	149938796	12	0	5.31616e-11	NM_001013845	CXorf40B	0
chr6	43053268	43059088	43056544	12	0	5.31616e-11	NM_001168370	CUL7	0
chr4	913288	915680	913289	12	0	5.31616e-11	NM_001318134	GAK	0
chr1	1567463	1568045	1567515	12	0	5.31616e-11	NM_014188	SSU72	0
chr19	2149249	2152066	2152063	13	0	5.31616e-11	NM_003938	AP3D1	0
chr6	42974854	42979850	42979406	12	0	5.31616e-11	NM_000287	PEX6	0
chr11	33735620	33737186	33736962	13	0	5.31616e-11	NM_000611	CD59	0
chr1	225877087	225882362	225882359	13	0	5.31616e-11	NM_014698	TMEM63A	0
chr18	31506597	31512811	31510479	12	0	5.31616e-11	NM_001943	DSG2	0
chr18	244956	245245	245242	13	0	5.31616e-11	NM_005131	THOC1	0
chr1	229664091	229664596	229664410	13	0	5.31616e-11	NM_001314021	URB2	-3891
chrX	101390863	101393894	101390973	12	0	5.31616e-11	NM_021029	RPL36A	0
chr19	9323440	9324833	9324200	12	0	5.31616e-11	NM_001202406	ZNF559	0
chr11	69297315	69297328	69297316	12	0	5.31616e-11	NM_001293294	MYEOV	-28
chr4	39457970	39460099	39459285	12	0	5.31616e-11	NM_000661	RPL9	0
chr19	9136046	9140612	9140102	13	0	5.31616e-11	NR_102435	ZNF317	0
chr17	76071211	76073218	76071934	12	0	5.31616e-11	NM_001260502	SRP68	0
chrX	101052054	101052210	101052054	12	0	5.31616e-11	NM_001167971	TRMT2B	0
chr1	15175420	15180238	15179473	12	0	5.31616e-11	NM_001136216	TMEM51	0
chr6	15328560	15331570	15331042	12	0	5.31616e-11	NM_004973	JARID2	0
chr3	184893701	184894326	184894323	12	0	5.31616e-11	NM_001349293	VPS8	0
chr1	12435761	12436017	12435814	12	0	5.31616e-11	NM_015378	VPS13D	0
chr18	73789766	73793221	73793218	13	0	5.31616e-11	NM_152676	FBXO15	280132
chrX	110210106	110210709	110210394	13	0	5.31616e-11	NM_001025580	AMMECR1	0
chr6	44386884	44387385	44387374	13	0	5.31616e-11	NM_001253	CDC5L	129
chr6	44312654	44316038	44313517	13	0	5.31616e-11	NM_020745	AARS2	0
chr11	67427911	67427987	67427984	12	0	5.31616e-11	NM_003952	RPS6KB2	477
chr18	4283932	4284010	4284007	13	0	5.31616e-11	NM_004746	DLGAP1	0
chr12	109947393	109947876	109947592	54	8	5.95131e-11	NM_001135213	GIT2	0
chr11	16738992	16740165	16739802	19	0	6.86688e-11	NM_014267	C11orf58	0
chr17	45146745	45148036	45147790	32	2	8.31443e-11	NM_006460	HEXIM1	0
chr12	56722365	56725772	56725667	38	3	8.5271e-11	NM_001113201	NACA	0
chr13	97430322	97436352	97433796	30	2	8.65729e-11	NM_021033	RAP2A	0
chr6	20159830	20160927	20160576	38	3	9.58457e-11	NM_001080480	MBOAT1	0
chr12	103953617	103957738	103957569	29	2	1.00309e-10	NM_001135570	C12orf73	0
chr1	153990414	153990622	153990619	20	0	1.02053e-10	NM_001030	RPS27	133
chr6	44833304	44833438	44833435	13	0	1.10405e-10	NR_146634	SUPT3H	0
chr1	155857031	155861177	155859075	47	2	1.15007e-10	NM_001282858	GON4L	0
chr6	5261574	5266048	5261574	22	1	1.19899e-10	NM_001318872	FARS2	0
chr20	50955905	50961052	50958698	29	2	1.36207e-10	NM_003859	DPM1	0
chr19	38965020	38965136	38965101	15	0	1.48513e-10	NM_024907	FBXO17	0
chr19	17306552	17311469	17309247	22	1	1.50181e-10	NM_023937	MRPL34	0
chr12	65891854	65896002	65893214	20	0	1.51937e-10	NM_001300919	HMGA2	0
chr12	21501103	21502572	21501933	14	0	1.74376e-10	NM_032941	RECQL	0
chr4	139554149	139556541	139555002	18	0	1.77923e-10	NM_001306199	SETD7	0
chr2	19982373	19982443	19982395	12	0	1.84063e-10	NM_001006657	WDR35	0
chr11	73875722	73876606	73876603	14	0	1.84933e-10	NM_016565	COA4	0
chr9	128657187	128657943	128657254	22	1	2.0384e-10	NR_031672	MIR1268A	0
chr3	121745030	121749126	121748851	22	0	2.12124e-10	NM_001256486	GOLGB1	0
chr22	46035107	46037467	46035618	24	0	2.18195e-10	NR_027036	LINC00899	2440
chr19	47130616	47130636	47130616	27	2	2.34884e-10	NM_005500	SAE1	187
chr1	100131626	100135569	100133442	28	2	2.34884e-10	NM_001304829	SASS6	0
chr1	109425580	109430098	109425664	27	2	2.34884e-10	NM_001199772	PSMA5	0
chr17	46922779	46923877	46923365	27	2	2.34884e-10	NM_001353114	GOSR2	0
chr19	49813238	49819296	49814205	28	2	2.34884e-10	NM_001352262	FUZ	0
chr2	61143047	61145285	61145150	22	0	2.79297e-10	NR_036496	LOC339803	0
chr17	39687619	39688837	39688135	59	8	2.80384e-10	NM_001291726	PGAP3	0
chr3	40546888	40547161	40547132	15	0	3.16295e-10	NM_198484	ZNF621	-7094
chr8	130334576	130334828	130334825	15	0	3.16295e-10	NM_001247996	ASAP1	0
chr3	9361932	9364836	9363457	35	1	3.46399e-10	NM_001114092	THUMPD3	0
chr17	60671419	60678930	60676069	40	5	3.52412e-10	NM_001353146	BCAS3	0
chr9	127424158	127424161	127424158	12	0	3.59625e-10	NM_001286696	ZNF79	213
chr3	183635082	183636557	183636554	16	0	3.74297e-10	NM_001349418	KLHL24	0
chr17	48671665	48672365	48672300	12	0	3.96953e-10	NR_029582	MIR196A1	-39106
chr2	22980443	22981980	22981422	14	0	4.09487e-10	NM_052920	KLHL29	403447
chr14	65001195	65001198	65001195	13	0	4.42923e-10	NM_001202558	CHURC1-FNTB	0
chr12	50211691	50212036	50212033	12	0	4.56092e-10	NM_016357	LIMA1	0
chr3	33437954	33441454	33439136	22	0	4.6102e-10	NM_001128160	UBP1	0
chr7	23470906	23475120	23471554	42	4	4.71592e-10	NM_006547	IGF2BP3	-530
chr17	7250566	7253281	7252439	25	0	4.79968e-10	NM_001143775	CTDNEP1	0
chr1	114511382	114511782	114511405	12	0	4.84833e-10	NM_015906	TRIM33	-222
chr2	239393377	239394286	239394283	14	0	5.04336e-10	NM_006037	HDAC4	0
chr3	184135288	184136165	184135288	14	0	5.04336e-10	NM_003907	EIF2B5	0
chr1	15831904	15836186	15832188	20	1	5.65708e-10	NR_024279	FLJ37453	0
chr1	110961623	110964708	110964368	20	1	5.65708e-10	NM_001006945	LRIF1	0
chr15	45586859	45588706	45588026	21	1	5.65708e-10	NR_132351	BLOC1S6	0
chr12	57079338	57079871	57079364	20	1	5.65708e-10	NM_001130963	NEMP1	-547
chr3	15601596	15606387	15601596	21	1	5.65708e-10	NM_001284416	HACL1	0
chr19	50803219	50807754	50804559	21	1	5.65708e-10	NM_032712	C19orf48	0
chr12	128818757	128818940	128818757	20	1	5.65708e-10	NM_145648	SLC15A4	0
chr22	24146298	24147132	24146307	21	1	5.65708e-10	NM_012295	CABIN1	0
chr11	59668148	59670890	59668625	21	1	5.65708e-10	NM_152716	PATL1	0
chr3	62935689	62941601	62938641	20	1	5.65708e-10	NM_003716	CADPS	-60300
chr5	116084666	116085548	116085516	20	1	5.65708e-10	NM_016144	COMMD10	0
chr1	33420780	33423661	33421454	20	1	5.65708e-10	NM_198040	PHC2	-45187
chr16	75433632	75434112	75433987	20	1	5.65708e-10	NM_006324	CFDP1	-143
chr2	27771285	27773172	27772199	16	0	5.79446e-10	NM_145330	MRPL33	0
chr1	159008391	159009548	159009044	44	6	5.92253e-10	NM_001206567	IFI16	344
chr7	139358319	139361852	139359721	44	6	5.92253e-10	NM_001244585	LUC7L2	0
chr8	18084801	18085972	18084801	16	0	6.09185e-10	NM_001127505	ASAH1	0
chr17	1881195	1881442	1881384	23	0	6.58074e-10	NM_002945	RPA1	0
chr22	30976596	30976788	30976785	12	0	6.70835e-10	NR_002323	TUG1	0
chr3	61849007	61849891	61849007	13	0	6.70835e-10	NM_002841	PTPRG	0
chr3	13451647	13454743	13451810	28	2	6.95257e-10	NR_046690	HDAC11-AS1	22245
chr3	56557461	56557928	56557461	13	0	6.99693e-10	NR_148378	CCDC66	0
chr8	66711806	66714075	66714072	17	0	7.12479e-10	NM_001204173	C8orf44-SGK3	0
chr11	65083336	65083827	65083824	14	0	7.28281e-10	NM_080668	CDCA5	0
chr2	43416846	43420333	43417314	15	0	7.56222e-10	NR_144316	THADA	0
chr20	41028234	41028795	41028491	17	0	8.89361e-10	NM_003286	TOP1	23
chr1	11905308	11910832	11908381	20	1	9.18392e-10	NR_002754	RNU5E-1	0
chr19	57829225	57830084	57829372	17	0	9.41214e-10	NM_001204818	ZNF587B	210
chr14	39114027	39114188	39114185	12	0	1.05948e-09	NM_001009183	GEMIN2	96
chr3	140953198	140953652	140953368	12	0	1.1787e-09	NM_001104647	SLC25A36	0
chr1	228472677	228473783	228472948	15	0	1.25273e-09	NR_039812	MIR4666A	-10525
chr2	25528267	25529382	25528756	20	1	1.25388e-09	NM_001351381	DTNB	0
chr10	92240801	92243905	92240801	21	0	1.37427e-09	NM_001178137	CPEB3	0
chr12	56115301	56117828	56116404	30	3	1.57765e-09	NM_001035267	RPL41	0
chr17	30116347	30117719	30117196	30	3	1.57765e-09	NM_032141	NSRP1	0
chr4	4247718	4249445	4248389	30	3	1.57765e-09	NM_032927	TMEM128	0
chr21	33401164	33405145	33401303	21	1	1.61446e-09	NM_001329128	IFNGR2	0
chr5	123422901	123424690	123423616	14	0	1.68129e-09	NM_153223	CEP120	0
chr11	72110784	72114785	72112528	41	2	1.69679e-09	NM_001330321	ANAPC15	0
chr22	41683000	41687879	41687586	18	0	1.72928e-09	NM_005008	SNU13	0
chr3	128050734	128052976	128051883	17	0	1.7682e-09	NM_013336	SEC61A1	0
chr4	94452575	94453317	94452575	12	0	1.78634e-09	NM_001256429	PDLIM5	0
chr17	44556706	44557114	44557111	25	2	1.82964e-09	NM_001466	FZD2	330
chr10	92588769	92594406	92591309	25	1	1.82964e-09	NM_004523	KIF11	0
chr3	45688653	45691631	45690047	26	2	1.82964e-09	NR_033947	LIMD1-AS1	0
chr4	128315638	128316396	128315763	25	2	1.82964e-09	NM_006320	PGRMC2	-26809
chr19	17419076	17419750	17419743	25	2	1.82964e-09	NM_001304547	MVB12A	0
chr22	38704636	38707799	38705950	25	2	1.82964e-09	NM_004286	GTPBP1	0
chr3	37243882	37244333	37244330	12	0	1.97602e-09	NM_002078	GOLGA4	0
chr14	49973052	49973055	49973052	10	0	2.13248e-09	NR_106724	MIR6076	-6541
chr5	141320116	141321585	141320284	10	0	2.13248e-09	NM_005642	TAF7	0
chr14	50260818	50260821	50260818	10	0	2.13248e-09	NM_024884	L2HGDH	0
chr7	139838688	139838768	139838765	10	0	2.13248e-09	NM_001130966	TBXAS1	0
chr7	128182548	128183112	128183031	10	0	2.13248e-09	NR_029596	MIR129-1	24760
chr6	85461524	85465297	85461524	11	0	2.13248e-09	NM_001204813	NT5E	0
chr14	23145911	23148964	23148531	10	0	2.13248e-09	NM_001267036	SLC7A8	0
chr6	43089550	43090798	43089618	11	0	2.13248e-09	NM_002821	PTK7	0
chr5	126354590	126355064	126354590	10	0	2.13248e-09	NM_001146319	GRAMD2B	5032
chr5	134049501	134054144	134054137	10	0	2.13248e-09	NM_003374	VDAC1	-44368
chr6	44401040	44405037	44401040	10	0	2.13248e-09	NM_001253	CDC5L	0
chr7	123734804	123734807	123734804	10	0	2.13248e-09	NM_003941	WASL	0
chr14	40304714	40309464	40309140	11	0	2.13248e-09	NR_109757	LINC02315	645247
chr7	120506289	120506292	120506289	10	0	2.13248e-09	NM_012281	KCND2	0
chr6	37985330	37985351	37985348	11	0	2.13248e-09	NM_021943	ZFAND3	0
chr5	138574218	138576056	138574637	10	0	2.13248e-09	NM_004134	HSPA9	0
chr7	128042969	128045909	128045906	10	0	2.13248e-09	NM_014390	SND1	0
chr5	122756270	122757288	122757285	10	0	2.13248e-09	NM_003100	SNX2	17708
chr7	101924365	101928094	101924365	10	0	2.13248e-09	NM_001913	CUX1	0
chr6	36925071	36925429	36925153	11	0	2.13248e-09	NM_001286636	C6orf89	0
chr2	170928174	170930523	170928349	11	0	2.13248e-09	NM_001201428	GORASP2	0
chr6	44445981	44447167	44447164	10	0	2.13248e-09	NM_001253	CDC5L	0
chr2	197782570	197784947	197784944	10	0	2.13248e-09	NM_001284361	BOLL	0
chr5	141513871	141514361	141513871	11	0	2.13248e-09	NM_001079812	DIAPH1	660
chr15	38254238	38259555	38254646	11	0	2.13248e-09	NM_152594	SPRED1	0
chr2	210002086	210002254	210002086	10	0	2.13248e-09	NM_001318926	RPE	311
chr2	189781895	189785277	189783342	11	0	2.13248e-09	NM_001128150	ORMDL1	0
chr7	148628765	148632888	148632885	11	0	2.13248e-09	NM_145304	C7orf33	-12905
chr14	90647841	90648045	90647841	11	0	2.13248e-09	NM_001010854	TTC7B	0
chr5	177351463	177352520	177352355	10	0	2.13248e-09	NM_006816	LMAN2	0
chr6	20639019	20640281	20640126	11	0	2.13248e-09	NM_017774	CDKAL1	0
chr5	178356427	178357490	178356427	11	0	2.13248e-09	NM_173465	COL23A1	0
chr5	178626049	178626154	178626049	11	0	2.13248e-09	NM_020666	CLK4	0
chr7	14197215	14197306	14197215	11	0	2.13248e-09	NM_001350712	DGKB	0
chr7	6077977	6081886	6080949	11	0	2.13248e-09	NM_001134335	EIF2AK1	-18748
chr6	2581170	2581698	2581170	10	0	2.13248e-09	NR_131168	LINC01600	40215
chr14	81434068	81436092	81436089	10	0	2.13248e-09	NR_109999	LINC02308	5895
chr7	5691817	5694342	5694339	10	0	2.13248e-09	NM_207111	RNF216	0
chr2	200968395	200970298	200969395	10	0	2.13248e-09	NM_001321629	FAM126B	3420
chr2	200405251	200408651	200405958	10	0	2.13248e-09	NM_001282735	SPATS2L	0
chr2	191571313	191571316	191571313	10	0	2.13248e-09	NR_045622	NABP1	106756
chr6	127459077	127460324	127459174	10	0	2.13248e-09	NM_014702	KIAA0408	0
chr15	25808113	25812297	25808113	10	0	2.13248e-09	NM_024490	ATP10A	0
chr6	17715005	17715188	17715005	10	0	2.13248e-09	NR_134618	LOC105374952	-3978
chr15	25504894	25507397	25507394	10	0	2.13248e-09	NM_130839	UBE3A	-65866
chr6	141483262	141484293	141483670	11	0	2.13248e-09	NM_002511	NMBR	590191
chr6	8706126	8707144	8707141	10	0	2.13248e-09	NR_038979	LOC100506207	0
chr6	14001215	14002085	14002082	11	0	2.13248e-09	NM_001165034	RNF182	-21206
chr6	159691501	159695301	159691501	10	0	2.13248e-09	NM_001024465	SOD2	0
chr6	152301570	152302404	152302044	11	0	2.13248e-09	NM_033071	SYNE1	0
chr14	95503569	95507219	95507216	10	0	2.13248e-09	NR_001459	SNHG10	25693
chr14	51316252	51319430	51318074	11	0	2.13248e-09	NR_145423	LINC00519	0
chr7	38040988	38045059	38042250	10	0	2.13248e-09	NM_001242946	EPDR1	-89048
chr7	39754614	39758829	39758826	10	0	2.13248e-09	NR_026999	LINC00265	0
chr6	88963705	88964564	88964420	10	0	2.13248e-09	NM_003800	RNGTT	-76
chr7	97971552	97973741	97971855	11	0	2.13248e-09	NR_147989	CZ1P-ASNS	0
chr6	89474729	89475151	89474729	10	0	2.13248e-09	NM_014942	ANKRD6	0
chr5	146178320	146182374	146182371	10	0	2.13248e-09	NM_020117	LARS	0
chr14	54526615	54529515	54526741	10	0	2.13248e-09	NM_006568	CGRRF1	0
chr6	26570062	26575766	26571181	11	0	2.13248e-09	NR_134611	LOC105374988	0
chr15	51934067	51936862	51936859	11	0	2.13248e-09	NM_001286430	LEO1	1163
chr2	177148263	177149830	177148522	10	0	2.13248e-09	NM_001330247	HNRNPA3	62864
chr14	63438472	63438662	63438472	10	0	2.13248e-09	NM_001282181	PPP2R5E	0
chr14	63659594	63660098	63660095	11	0	2.13248e-09	NM_001008726	WDR89	-17671
chr7	92447273	92451857	92448732	11	0	2.13248e-09	NM_021167	GATAD1	0
chr14	67240518	67242050	67240518	11	0	2.13248e-09	NM_001256550	MPP5	0
chr7	38908592	38908802	38908739	10	0	2.13248e-09	NM_014396	VPS41	0
chr7	76047281	76051764	76049764	10	0	2.13248e-09	NM_001317785	STYXL1	0
chr5	154938418	154941160	154941157	10	0	2.13248e-09	NM_014180	MRPL22	0
chr14	67622666	67623168	67623165	10	0	2.13248e-09	NM_001172	ARG2	0
chr7	72538910	72539456	72539252	11	0	2.13248e-09	NM_001145440	TYW1B	35051
chr6	107492415	107492457	107492454	10	0	2.13248e-09	NM_018013	SOBP	0
chr5	160794236	160798668	160798665	10	0	2.13248e-09	NM_025153	ATP10B	0
chr6	26136511	26143613	26140991	10	0	2.13248e-09	NM_003512	HIST1H2AC	-11821
chr15	38894745	38899629	38899473	10	0	2.13248e-09	NM_207444	C15orf53	-194707
chr14	73455113	73459753	73458925	10	0	2.13248e-09	NM_001005743	NUMB	0
chr7	44846162	44849273	44847635	10	0	2.13248e-09	NM_138635	H2AFV	0
chr7	44820669	44823975	44820691	10	0	2.13248e-09	NM_138635	H2AFV	2914
chr14	77542764	77543017	77542916	10	0	2.13248e-09	NM_004863	SPTLC2	0
chr7	44196298	44201525	44196819	10	0	2.13248e-09	NM_006555	YKT6	0
chr6	26363790	26369907	26364874	11	0	2.13248e-09	NM_001197247	BTN3A2	0
chr15	42207804	42208906	42208137	10	0	2.13248e-09	NM_015289	VPS39	0
chr8	144796105	144802297	144798329	10	0	2.13248e-09	NR_134285	ZNF517	0
chr7	151099451	151102309	151099500	10	0	2.13248e-09	NM_001350104	AGAP3	0
chr3	100267182	100270553	100269799	11	0	2.13248e-09	NM_001199198	TBC1D23	0
chr10	110262298	110262776	110262773	10	0	2.13248e-09	NM_130439	MXI1	0
chr4	53068956	53071050	53071047	10	0	2.13248e-09	NM_152540	SCFD2	0
chr12	53491775	53496610	53496009	10	0	2.13248e-09	NM_001193511	MAP3K12	0
chr3	109535579	109536618	109536615	10	0	2.13248e-09	NR_109841	LINC01205	-40412
chr4	48780209	48780989	48780697	10	0	2.13248e-09	NM_015030	FRYL	0
chr10	98063261	98063264	98063261	11	0	2.13248e-09	NM_018058	CRTAC1	-32433
chr10	119286064	119286532	119286421	10	0	2.13248e-09	NM_005308	GRK5	0
chr4	38873295	38873398	38873395	10	0	2.13248e-09	NM_001350635	FAM114A1	0
chr10	129912525	129913210	129913071	11	0	2.13248e-09	NM_001005463	EBF3	0
chr11	206821	208720	208717	11	0	2.13248e-09	NM_001098787	BET1L	0
chr11	2399451	2401399	2400869	11	0	2.13248e-09	NM_001297661	TSSC4	0
chr11	3786926	3787090	3786926	11	0	2.13248e-09	NM_139132	NUP98	0
chr12	51047712	51048560	51048146	10	0	2.13248e-09	NR_147098	LETMD1	0
chr10	122992170	122992365	122992170	10	0	2.13248e-09	NM_001271840	IKZF5	0
chr10	88986815	88992662	88991619	10	0	2.13248e-09	NM_001141945	ACTA2	0
chr12	56689079	56689282	56689279	11	0	2.13248e-09	NM_001282603	PTGES3	-671
chr10	74460707	74465878	74461050	10	0	2.13248e-09	NM_001202450	ADK	0
chr9	132671087	132675577	132671788	10	0	2.13248e-09	NM_012204	GTF3C4	0
chr3	63910050	63913622	63913619	11	0	2.13248e-09	NM_000333	ATXN7	0
chr12	102061004	102061723	102061477	11	0	2.13248e-09	NM_001301107	WASHC3	0
chr12	93497466	93497658	93497655	10	0	2.13248e-09	NM_172177	MRPL42	0
chr4	112762852	112762862	112762855	10	0	2.13248e-09	NM_001127493	ANK2	55221
chr12	87870269	87871703	87870269	10	0	2.13248e-09	NR_033410	MKRN9P	-85558
chr12	85281001	85285887	85281123	11	0	2.13248e-09	NM_006982	ALX1	0
chr12	74656057	74660360	74656057	11	0	2.13248e-09	NM_001136262	ATXN7L3B	-114605
chr10	31802765	31808092	31803593	11	0	2.13248e-09	NM_001270699	ARHGAP12	0
chr10	32865140	32866114	32866111	10	0	2.13248e-09	NM_001321115	CCDC7	0
chr10	45969698	45974026	45973039	11	0	2.13248e-09	NR_029388	PARGP1	0
chr12	64821873	64821876	64821873	10	0	2.13248e-09	NM_001330187	TBC1D30	0
chr10	52213152	52217592	52216399	10	0	2.13248e-09	NM_001098512	PRKG1	0
chr10	58822565	58827096	58822565	10	0	2.13248e-09	NM_001080512	BICC1	0
chr12	57459161	57459164	57459161	11	0	2.13248e-09	NM_001160045	GLI1	971
chr3	113239028	113242345	113239028	11	0	2.13248e-09	NM_033254	BOC	0
chr12	104669322	104675266	104672069	10	0	2.13248e-09	NM_001173982	CHST11	0
chr11	4093386	4097886	4095368	11	0	2.13248e-09	NM_001033	RRM1	0
chr4	4427375	4431251	4427506	10	0	2.13248e-09	NM_016930	STX18	0
chr11	75885588	75888778	75886007	10	0	2.13248e-09	NM_003369	UVRAG	0
chr11	77423622	77425616	77425613	10	0	2.13248e-09	NM_002576	PAK1	0
chr12	12182844	12183330	12182977	10	0	2.13248e-09	NM_002336	LRP6	0
chr3	148163139	148164280	148164277	10	0	2.13248e-09	NR_134937	LINC02032	-75110
chr12	7861318	7861353	7861350	10	0	2.13248e-09	NM_001286233	SLC2A14	0
chr3	149544600	149548878	149544600	10	0	2.13248e-09	NM_015472	WWTR1	0
chr11	74169831	74172132	74172129	10	0	2.13248e-09	NM_001286577	C2CD3	0
chr11	102599883	102603108	102603105	10	0	2.13248e-09	NM_004771	MMP20	0
chr11	112225405	112226749	112226288	10	0	2.13248e-09	NM_000317	PTS	0
chr11	118997752	118997989	118997869	10	0	2.13248e-09	NM_198489	CCDC84	144
chr11	120334940	120338372	120335901	11	0	2.13248e-09	NM_001198665	ARHGEF12	0
chr11	125083338	125083342	125083338	11	0	2.13248e-09	NM_001145290	SLC37A2	0
chr11	125481657	125481783	125481657	10	0	2.13248e-09	NM_005103	FEZ1	0
chr11	128136376	128139923	128136376	10	0	2.13248e-09	NR_146647	LINC02098	68843
chr11	103285892	103285950	103285919	10	0	2.13248e-09	NM_001080463	DYNC2H1	0
chr3	179806854	179811556	179811327	10	0	2.13248e-09	NM_001349397	PEX5L	0
chr3	133572463	133576332	133573158	10	0	2.13248e-09	NM_017548	CDV3	0
chr3	182785991	182790007	182785991	11	0	2.13248e-09	NM_014616	ATP11B	3496
chr4	1243907	1249875	1248329	10	0	2.13248e-09	NM_001328	CTBP1	0
chr11	33372184	33378197	33375936	10	0	2.13248e-09	NM_001278163	HIPK3	-15162
chr3	196714100	196715326	196714711	10	0	2.13248e-09	NM_001166304	PIGX	0
chr12	47081265	47086121	47083845	10	0	2.13248e-09	NM_001281429	PCED1B	0
chr3	193462811	193464160	193462811	10	0	2.13248e-09	NM_032279	ATP13A4	0
chr12	46403112	46404209	46403299	11	0	2.13248e-09	NR_125379	LOC100288798	0
chr12	43880769	43887512	43884985	10	0	2.13248e-09	NM_001286211	TMEM117	0
chr3	126474551	126476724	126476442	11	0	2.13248e-09	NM_025112	ZXDC	0
chr3	126909980	126911540	126909980	10	0	2.13248e-09	NM_001320610	CHCHD6	0
chr11	62830943	62832264	62832261	11	0	2.13248e-09	NM_001244666	STX5	0
chr11	65280071	65282006	65280148	11	0	2.13248e-09	NM_002689	POLA2	0
chr12	28429904	28434225	28434222	10	0	2.13248e-09	NM_001352086	CCDC91	0
chr11	68441541	68441898	68441895	10	0	2.13248e-09	NM_002335	LRP5	0
chr3	129855796	129855945	129855796	11	0	2.13248e-09	NM_001349270	TMCC1	0
chr3	132291197	132291724	132291197	10	0	2.13248e-09	NM_001099	ACPP	25643
chr4	6834860	6839436	6834949	10	0	2.13248e-09	NM_014743	KIAA0232	0
chr13	109954021	109958265	109958262	10	0	2.13248e-09	NR_126387	LINC00396	95020
chr9	130689637	130692715	130691497	10	0	2.13248e-09	NR_104230	EXOSC2	1045
chr12	108644105	108644156	108644105	11	0	2.13248e-09	NM_001105237	CORO1C	955
chr8	53943979	53945627	53945576	11	0	2.13248e-09	NM_001286673	RGS20	0
chr13	48299602	48305724	48303611	10	0	2.13248e-09	NR_046414	LINC00441	0
chr8	54897251	54897500	54897497	11	0	2.13248e-09	NM_052898	XKR4	204957
chr13	45500016	45501043	45500679	11	0	2.13248e-09	NM_031431	COG3	0
chr8	66430433	66431391	66430689	10	0	2.13248e-09	NM_015169	RRS1	0
chr5	59814385	59816247	59814385	10	0	2.13248e-09	NM_001349243	PDE4D	0
chr8	48738146	48743314	48738694	11	0	2.13248e-09	NM_001142857	EFCAB1	-2835
chr8	68244949	68249671	68247947	10	0	2.13248e-09	NM_024870	PREX2	-7916
chr8	74885546	74890547	74890544	10	0	2.13248e-09	NM_001324403	PI15	-30502
chr8	97424330	97424983	97424980	11	0	2.13248e-09	NR_125390	LOC101927066	0
chr13	40770888	40771577	40770888	11	0	2.13248e-09	NM_005830	MRPS31	0
chr3	37175541	37176888	37176885	10	0	2.13248e-09	NM_001348310	LRRFIP2	0
chr5	43853531	43855797	43855794	10	0	2.13248e-09	NM_012343	NNT	-147965
chr8	109332492	109334040	109334037	10	0	2.13248e-09	NM_032869	NUDCD1	0
chr8	70607372	70608853	70608134	10	0	2.13248e-09	NM_001317805	TRAM1	0
chr13	48401017	48401020	48401017	10	0	2.13248e-09	NM_000321	RB1	0
chr13	51383537	51385942	51383537	11	0	2.13248e-09	NM_001039937	INTS6	0
chr5	71887875	71887878	71887875	11	0	2.13248e-09	NM_004291	CARTPT	-166827
chr7	151338317	151345688	151342094	10	0	2.13248e-09	NM_001243351	NUB1	0
chr3	11288698	11291628	11288944	10	0	2.13248e-09	NM_001349235	ATG7	0
chr7	151505729	151508987	151508984	10	0	2.13248e-09	NM_005614	RHEB	0
chr5	107651284	107655408	107655405	10	0	2.13248e-09	NM_001962	EFNA5	0
chr7	157366363	157366366	157366363	10	0	2.13248e-09	NM_005494	DNAJB6	0
chr5	92552305	92552825	92552584	10	0	2.13248e-09	NR_109822	NR2F1-AS1	856531
chr5	91280405	91280486	91280405	11	0	2.13248e-09	NR_103548	LUCAT1	22500
chr8	23000435	23003272	23003269	10	0	2.13248e-09	NM_001160036	RHOBTB2	0
chr8	25243817	25243820	25243817	10	0	2.13248e-09	NM_001322810	DOCK5	0
chr8	26292537	26296547	26296379	11	0	2.13248e-09	NM_002717	PPP2R2A	0
chr13	66008313	66008316	66008313	10	0	2.13248e-09	NR_039692	MIR548X2	-41884
chr5	78293936	78295162	78295053	10	0	2.13248e-09	NM_001271769	AP3B1	0
chr5	75717021	75717450	75717236	11	0	2.13248e-09	NM_001099271	POC5	0
chr8	38104380	38108209	38105411	10	0	2.13248e-09	NM_001282272	ASH2L	0
chr13	51643273	51644170	51643798	10	0	2.13248e-09	NM_052950	WDFY2	0
chr8	120081001	120084673	120081001	10	0	2.13248e-09	NM_022783	DEPTOR	-30083
chr3	54987747	54987750	54987747	11	0	2.13248e-09	NM_018398	CACNA2D3	0
chr8	122788402	122789328	122789325	10	0	2.13248e-09	NM_014943	ZHX2	0
chr8	123037435	123042530	123042359	10	0	2.13248e-09	NM_001134671	DERL1	0
chr3	49104885	49105368	49104885	11	0	2.13248e-09	NM_001272073	QARS	0
chr4	180563943	180564416	180564050	11	0	2.13248e-09	NR_033918	LINC00290	499674
chr4	177316988	177322966	177316988	11	0	2.13248e-09	NM_018248	NEIL3	0
chr9	96048950	96049040	96049037	10	0	2.13248e-09	NR_033838	LOC158435	16799
chr9	99130839	99133710	99130839	11	0	2.13248e-09	NM_001130916	TGFBR1	0
chr3	49939711	49939715	49939711	10	0	2.13248e-09	NM_001349193	RBM6	329
chr9	79582044	79582788	79582251	11	0	2.13248e-09	NM_001282760	TLE4	0
chr4	153279272	153279275	153279272	10	0	2.13248e-09	NM_001351056	TRIM2	0
chr4	149986999	149987938	149986999	10	0	2.13248e-09	NM_001040260	DCLK2	90336
chr9	124868646	124870050	124868646	11	0	2.13248e-09	NM_030978	ARPC5L	0
chr4	146241432	146241949	146241946	11	0	2.13248e-09	NM_001029998	SLC10A7	12039
chr9	128371831	128372599	128372431	11	0	2.13248e-09	NR_031672	MIR1268A	0
chr12	108691966	108692587	108691966	11	0	2.13248e-09	NM_001105237	CORO1C	0
chr3	53880058	53881567	53880521	10	0	2.13248e-09	NM_022899	ACTR8	0
chr9	121260976	121262325	121261984	10	0	2.13248e-09	NM_001353054	GSN	0
chr12	120725589	120725657	120725654	10	0	2.13248e-09	NM_000017	ACADS	81
chr4	184382803	184383998	184383742	10	0	2.13248e-09	NR_125933	LINC02362	-497
chr9	72930731	72932239	72931831	11	0	2.13248e-09	NM_000689	ALDH1A1	0
chr5	38500943	38509207	38505846	11	0	2.13248e-09	NM_002310	LIFR	0
chr5	18398007	18398010	18398007	10	0	2.13248e-09	NR_134286	LINC02223	-467518
chr5	16908638	16912572	16912569	10	0	2.13248e-09	NM_012334	MYO10	0
chr5	16464192	16467671	16465742	10	0	2.13248e-09	NM_033414	ZNF622	0
chr12	133181017	133181303	133181017	11	0	2.13248e-09	NM_001165883	ZNF268	106
chr12	132826910	132829058	132829055	11	0	2.13248e-09	NM_005895	GOLGA3	0
chr5	14936751	14937343	14937340	11	0	2.13248e-09	NM_054027	ANKH	-64973
chr8	144408905	144410094	144410091	11	0	2.13248e-09	NM_013291	CPSF1	0
chr12	123711585	123713833	123711585	11	0	2.13248e-09	NM_012463	ATP6V0A2	0
chr12	123458001	123460147	123458070	11	0	2.13248e-09	NM_022717	SNRNP35	0
chr9	2837697	2844402	2843335	11	0	2.13248e-09	NM_014878	PUM3	0
chr9	6781591	6781594	6781591	10	0	2.13248e-09	NM_001146696	KDM4C	0
chr9	34186326	34186461	34186400	10	0	2.13248e-09	NM_001171203	UBAP1	0
chr9	36470840	36471242	36471094	10	0	2.13248e-09	NM_194330	RNF38	-69642
chr9	72362421	72366601	72362750	10	0	2.13248e-09	NM_001278245	ZFAND5	0
chr8	123022685	123025197	123022685	10	0	2.13248e-09	NM_001134671	DERL1	0
chr10	119131521	119136025	119136022	11	0	2.13248e-09	NM_001303112	FAM45A	0
chr1	778259	779878	779288	10	0	2.13248e-09	NR_033908	LOC100288069	0
chr19	10566478	10571242	10567926	10	0	2.13248e-09	NM_001800	CDKN2D	0
chr20	35629022	35629627	35629624	11	0	2.13248e-09	NM_003915	CPNE1	0
chr20	20617531	20617567	20617564	10	0	2.13248e-09	NM_020343	RALGAPA2	0
chr2	85216994	85222704	85218876	10	0	2.13248e-09	NM_031283	TCF7L1	0
chr20	5950302	5951392	5951389	10	0	2.13248e-09	NM_001281467	TRMT6	0
chr20	5135386	5135389	5135386	10	0	2.13248e-09	NM_003818	CDS2	0
chr20	5056777	5061073	5056777	11	0	2.13248e-09	NM_001330987	TMEM230	7309
chr16	64826571	64833084	64829857	10	0	2.13248e-09	NM_001308392	CDH11	110669
chr20	3155773	3160055	3160052	10	0	2.13248e-09	NM_001267584	UBOX5	0
chr2	79586008	79586011	79586008	10	0	2.13248e-09	NM_001164883	CTNNA2	0
chr2	78352502	78356386	78356028	11	0	2.13248e-09	NR_110288	LOC101927967	-61771
chr2	75646440	75647459	75646440	10	0	2.13248e-09	NM_014763	MRPL19	0
chr19	58386932	58387244	58387241	10	0	2.13248e-09	NM_001009	RPS5	25
chr19	58363173	58364626	58363173	10	0	2.13248e-09	NR_136527	LOC105372483	0
chr19	58306327	58308396	58306327	11	0	2.13248e-09	NR_144447	ZNF8-ERVK3-1	0
chr16	70251967	70251970	70251967	11	0	2.13248e-09	NM_058219	EXOSC6	-37
chr19	55632523	55634859	55632523	11	0	2.13248e-09	NM_207115	ZNF580	6167
chr1	112461568	112465882	112465879	10	0	2.13248e-09	NR_036210	MIR4256	0
chr19	52991123	52991822	52991579	10	0	2.13248e-09	NR_003578	ZNF702P	0
chr19	48618342	48620622	48619685	11	0	2.13248e-09	NM_000979	RPL18	0
chr19	48321784	48323702	48321809	10	0	2.13248e-09	NM_001425	EMP3	1670
chr1	153518198	153521228	153518810	11	0	2.13248e-09	NM_014624	S100A6	13372
chr19	45507370	45507373	45507370	10	0	2.13248e-09	NM_003370	VASP	57
chr17	409683	409893	409890	10	0	2.13248e-09	NR_136407	LOC105371430	0
chr1	154176682	154183824	154181618	10	0	2.13248e-09	NM_001278191	TPM3	0
chr1	155561694	155563926	155563923	10	0	2.13248e-09	NM_018489	ASH1L	0
chr1	155645579	155646418	155646415	10	0	2.13248e-09	NM_001198899	YY1AP1	13024
chr19	45136110	45137403	45137400	10	0	2.13248e-09	NM_019121	PPP1R37	0
chr2	55693105	55694143	55694110	11	0	2.13248e-09	NM_033109	PNPT1	0
chr19	44094765	44095343	44095089	10	0	2.13248e-09	NM_013398	ZNF224	0
chr20	37857113	37859719	37857160	10	0	2.13248e-09	NM_001281495	CTNNBL1	0
chr17	7008948	7015527	7011805	11	0	2.13248e-09	NR_040089	ALOX12-AS1	0
chr1	84573112	84574602	84573537	10	0	2.13248e-09	NM_004388	CTBS	0
chr20	45157812	45158031	45158028	11	0	2.13248e-09	NM_002638	PI3	16868
chr22	32555827	32555830	32555827	10	0	2.13248e-09	NM_001135774	SYN3	0
chr1	37551530	37553897	37553245	10	0	2.13248e-09	NM_024700	SNIP1	0
chr2	118130712	118132018	118132015	10	0	2.13248e-09	NM_016133	INSIG2	-20681
chr22	31155617	31161185	31159581	10	0	2.13248e-09	NR_037496	MIR3928	0
chr22	30592010	30594203	30592093	11	0	2.13248e-09	NM_001282328	PES1	0
chr2	113593331	113593334	113593331	10	0	2.13248e-09	NR_024077	WASH2P	0
chr1	40411603	40411757	40411604	10	0	2.13248e-09	NM_022733	SMAP2	0
chr1	40531328	40532808	40531447	11	0	2.13248e-09	NM_152373	ZNF684	0
chr16	10901040	10904563	10901040	10	0	2.13248e-09	NR_104444	CIITA	0
chr22	20116416	20118575	20116416	10	0	2.13248e-09	NM_001331039	TRMT2A	0
chr22	20079263	20082839	20079831	11	0	2.13248e-09	NM_022720	DGCR8	0
chr16	20740415	20740972	20740415	11	0	2.13248e-09	NM_001304550	THUMPD1	0
chr16	20883849	20884292	20884253	11	0	2.13248e-09	NM_173475	DCUN1D3	0
chr22	19477366	19479589	19477366	11	0	2.13248e-09	NM_001035247	UFD1	0
chr1	45751009	45751012	45751009	11	0	2.13248e-09	NM_001145349	IPP	-196
chr22	17171121	17172199	17171121	10	0	2.13248e-09	NR_024482	HDHD5-AS1	-5676
chr21	44969905	44969908	44969905	11	0	2.13248e-09	NM_001316988	FAM207A	0
chr16	22004980	22009264	22007516	11	0	2.13248e-09	NM_001164579	C16orf52	0
chr16	22190017	22192195	22191831	11	0	2.13248e-09	NM_013302	EEF2K	14076
chr1	53197361	53197547	53197417	10	0	2.13248e-09	NM_001330589	CPT2	0
chr21	32748626	32749061	32748626	10	0	2.13248e-09	NR_027873	PAXBP1	0
chr21	17522854	17527422	17525536	11	0	2.13248e-09	NM_001207063	CXADR	0
chr2	99488034	99490545	99490542	11	0	2.13248e-09	NR_135649	REV1	0
chr20	62937239	62938594	62938573	11	0	2.13248e-09	NM_033081	DIDO1	0
chr20	56355944	56361261	56359778	10	0	2.13248e-09	NM_080821	FAM210B	0
chr1	71105607	71107244	71106954	10	0	2.13248e-09	NR_046217	ZRANB2-AS2	0
chr16	34247735	34252009	34251590	10	0	2.13248e-09	NR_038368	LINC00273	-87699
chr1	75474328	75474331	75474328	10	0	2.13248e-09	NM_001130058	SLC44A5	0
chr16	46619734	46623453	46620254	11	0	2.13248e-09	NM_001324319	SHCBP1	0
chr20	44965818	44967226	44966006	11	0	2.13248e-09	NR_038341	STK4-AS1	0
chr22	34834026	34834029	34834026	10	0	2.13248e-09	NR_138042	ISX-AS1	0
chr17	7241858	7242941	7241909	11	0	2.13248e-09	NM_007278	GABARAP	0
chr17	7884322	7887342	7887331	10	0	2.13248e-09	NM_001330111	NAA38	0
chr18	28657931	28657934	28657931	10	0	2.13248e-09	NM_001792	CDH2	-480485
chr18	24462978	24466730	24466727	11	0	2.13248e-09	NM_001143828	HRH4	0
chr18	22278132	22282985	22282872	11	0	2.13248e-09	NM_005257	GATA6	-75604
chr17	42016685	42019660	42016685	10	0	2.13248e-09	NM_001144766	DNAJC7	0
chr18	9017816	9017819	9017816	10	0	2.13248e-09	NM_021074	NDUFV2	84811
chr1	234631663	234631940	234631937	10	0	2.13248e-09	NR_033927	LINC00184	0
chr1	236688581	236693797	236690543	11	0	2.13248e-09	NM_001103	ACTN2	0
chr2	28893776	28899859	28893818	10	0	2.13248e-09	NM_015131	WDR43	0
chr18	331364	331582	331579	10	0	2.13248e-09	NM_130386	COLEC12	0
chr17	81891519	81891522	81891519	10	0	2.13248e-09	NM_005782	ALYREF	0
chr2	27185175	27185307	27185304	10	0	2.13248e-09	NM_021095	SLC5A6	14280
chr17	81153456	81153527	81153524	11	0	2.13248e-09	NM_001080395	AATK	0
chr1	244361946	244362336	244361946	11	0	2.13248e-09	NM_001012970	C1orf100	0
chr17	45047270	45050705	45050418	11	0	2.13248e-09	NM_001321326	DCAKD	0
chr17	45160884	45161634	45161631	10	0	2.13248e-09	NM_001303437	HEXIM2	0
chr17	47313663	47318405	47313721	11	0	2.13248e-09	NR_110881	THCAT158	0
chr2	24920914	24922224	24920914	10	0	2.13248e-09	NM_001320613	ADCY3	-897
chr17	79036636	79036639	79036636	10	0	2.13248e-09	NM_153372	C1QTNF1	0
chr2	24070967	24075898	24075782	11	0	2.13248e-09	NM_016047	SF3B6	0
chr17	49191353	49195459	49191752	10	0	2.13248e-09	NM_001198756	GNGT2	10775
chr17	50720119	50722974	50722467	10	0	2.13248e-09	NM_001330330	LUC7L3	0
chr1	248826587	248827158	248826596	11	0	2.13248e-09	NR_036070	MIR3124	-144
chr2	20287116	20287142	20287138	11	0	2.13248e-09	NM_001282752	PUM2	0
chr17	57473544	57476738	57473544	11	0	2.13248e-09	NM_001322250	MSI2	0
chr17	75402385	75406629	75406213	11	0	2.13248e-09	NM_002086	GRB2	0
chr17	70042614	70042617	70042614	10	0	2.13248e-09	NR_104129	LINC01028	8654
chr17	58657670	58659316	58659129	11	0	2.13248e-09	NM_001201457	TEX14	0
chr17	67902609	67903630	67902609	11	0	2.13248e-09	NM_004459	BPTF	0
chr17	63130738	63132463	63132055	11	0	2.13248e-09	NM_025185	TANC2	0
chr17	35577934	35579032	35578222	11	0	2.13248e-09	NM_000286	PEX12	0
chr17	7314817	7316630	7315549	11	0	2.13248e-09	NM_004489	GPS2	0
chr18	35287816	35290896	35289735	10	0	2.13248e-09	NM_001112734	ZSCAN30	0
chr17	31493174	31493274	31493271	10	0	2.13248e-09	NM_032932	RAB11FIP4	0
chr17	8156790	8157230	8156790	10	0	2.13248e-09	NM_014232	VAMP2	1917
chr1	165534657	165539587	165539584	10	0	2.13248e-09	NR_026744	LOC400794	0
chr2	48448725	48448763	48448725	11	0	2.13248e-09	NM_001135629	PPP1R21	0
chr19	36054014	36054737	36054734	11	0	2.13248e-09	NR_138539	THAP8	0
chr1	167039007	167041451	167039007	11	0	2.13248e-09	NM_005814	GPA33	11385
chr19	18151903	18153343	18152053	11	0	2.13248e-09	NM_005027	PIK3R2	0
chr19	17265804	17268257	17267928	11	0	2.13248e-09	NM_001288757	BABAM1	0
chr19	16495616	16496757	16495764	10	0	2.13248e-09	NM_145046	CALR3	0
chr19	15278739	15281638	15281504	11	0	2.13248e-09	NM_058243	BRD4	0
chr17	18026711	18026719	18026711	11	0	2.13248e-09	NM_145691	ATPAF2	0
chr19	13396612	13401323	13396612	11	0	2.13248e-09	NM_000068	CACNA1A	0
chr17	18314563	18315232	18315229	11	0	2.13248e-09	NM_004618	TOP3A	0
chr2	45610575	45611879	45611091	11	0	2.13248e-09	NM_018079	SRBD1	0
chr17	19375453	19379616	19377593	10	0	2.13248e-09	NM_001243475	B9D1	0
chr17	19649495	19651526	19650987	11	0	2.13248e-09	NM_001031806	ALDH3A2	0
chr19	12156035	12157072	12156035	10	0	2.13248e-09	NR_037802	ZNF625-ZNF20	0
chr19	11529391	11529395	11529391	10	0	2.13248e-09	NM_001142464	ECSIT	-219
chr1	184386410	184390810	184388389	10	0	2.13248e-09	NM_030806	C1orf21	0
chr2	44230279	44233634	44233589	11	0	2.13248e-09	NM_001033557	PPM1B	0
chr1	185047949	185051147	185051122	11	0	2.13248e-09	NM_007212	RNF2	0
chr19	10486513	10486516	10486513	10	0	2.13248e-09	NM_203500	KEAP1	0
chr17	27333392	27333505	27333392	11	0	2.13248e-09	NM_001348350	WSB1	-19771
chr1	201551540	201552697	201551756	10	0	2.13248e-09	NR_026667	RPS10P7	-30948
chr1	203524480	203524483	203524480	10	0	2.13248e-09	NM_014359	OPTC	-15531
chr1	203857367	203862257	203860325	10	0	2.13248e-09	NM_001304464	SNRPE	0
chr19	4638954	4639901	4638954	10	0	2.13248e-09	NM_152362	TNFAIP8L1	0
chr19	3184940	3186747	3185693	11	0	2.13248e-09	NM_020170	NCLN	0
chr1	209769179	209770264	209769490	10	0	2.13248e-09	NR_109871	TRAF3IP3	0
chr18	76447956	76454710	76450974	10	0	2.13248e-09	NM_014643	ZNF516	0
chr18	35344623	35347572	35344653	11	0	2.13248e-09	NM_006965	ZNF24	-156
chr22	36385080	36389620	36385434	11	0	2.13248e-09	NM_002473	MYH9	0
chr17	62493200	62497304	62496407	10	0	2.13248e-09	NM_001330418	TLK2	0
chr15	89948858	89949011	89949008	10	0	2.13248e-09	NM_001199058	C15orf38-AP3S2	-35868
chr15	96354918	96356911	96356908	11	0	2.13248e-09	NM_001145155	NR2F2	-14655
chr1	8885981	8890011	8887960	10	0	2.13248e-09	NR_038351	ENO1-AS1	-6097
chr15	99167713	99168488	99167717	10	0	2.13248e-09	NR_109947	TTC23	0
chr22	39398787	39404592	39400226	11	0	2.13248e-09	NM_006116	TAB1	0
chr22	39516031	39520862	39519338	11	0	2.13248e-09	NM_001304564	MIEF1	0
chr22	38201675	38201705	38201675	11	0	2.13248e-09	NM_012323	MAFF	227
chr1	9438916	9442730	9441762	10	0	2.13248e-09	NR_104622	LOC100506022	-9920
chr1	26396523	26396554	26396551	10	0	2.13248e-09	NM_024674	LIN28A	14214
chr22	41442387	41448926	41445323	11	0	2.13248e-09	NM_016272	TOB2	0
chr1	10032332	10035376	10033393	11	0	2.13248e-09	NM_006048	UBE4B	0
chr1	29230524	29234547	29231287	10	0	2.13248e-09	NM_016011	MECR	0
chr1	10108360	10108539	10108360	11	0	2.13248e-09	NM_006048	UBE4B	0
chr15	90661155	90665978	90665975	11	0	2.13248e-09	NR_120372	CRTC3-AS1	0
chr15	80643552	80646174	80645693	10	0	2.13248e-09	NM_014862	ARNT2	-45616
chr2	159123959	159129536	159124663	10	0	2.13248e-09	NM_001350062	TANC1	0
chr1	26515271	26518252	26515625	11	0	2.13248e-09	NM_002953	RPS6KA1	11506
chr1	12296913	12301792	12296978	11	0	2.13248e-09	NM_015378	VPS13D	0
chrX	49074235	49074507	49074235	10	0	2.13248e-09	NM_001029896	WDR45	0
chr1	15260426	15260429	15260426	10	0	2.13248e-09	NM_052929	FHAD1	0
chr1	14968790	14970411	14968790	11	0	2.13248e-09	NM_015209	KAZN	0
chr22	41469089	41470260	41469115	11	0	2.13248e-09	NM_001098	ACO2	0
chrX	47837123	47838000	47837997	10	0	2.13248e-09	NM_007137	ZNF81	0
chr2	127857748	127860442	127857748	10	0	2.13248e-09	NM_004805	POLR2D	0
chr1	6382861	6387385	6386704	10	0	2.13248e-09	NM_181864	ACOT7	0
chr1	24823189	24828415	24825409	10	0	2.13248e-09	NM_013943	CLIC4	0
chrX	45714845	45715403	45714845	11	0	2.13248e-09	NR_102268	LOC392452	15685
chr1	20058325	20058639	20058636	11	0	2.13248e-09	NM_000929	PLA2G5	11569
chr22	37657524	37658340	37658337	10	0	2.13248e-09	NR_109952	LOC101927051	0
chr1	21693682	21697880	21697822	11	0	2.13248e-09	NM_001350168	USP48	0
chr22	42610823	42615252	42615249	10	0	2.13248e-09	NM_032311	POLDIP3	0
chr22	37675138	37677281	37677278	11	0	2.13248e-09	NR_039973	MIR5096	0
chrX	19869872	19871945	19871942	10	0	2.13248e-09	NM_031892	SH3KBP1	0
chr12	79774557	79775719	79774634	20	0	2.35505e-09	NM_001143886	PPP1R12A	0
chr3	100708362	100710555	100709174	37	1	2.38567e-09	NM_001007565	TFG	0
chr1	224356626	224357929	224356780	14	0	2.4768e-09	NM_001277197	CNIH4	0
chr4	108618141	108621269	108618887	17	0	2.55915e-09	NR_026968	RPL34-AS1	0
chr11	10747963	10753731	10750818	27	2	2.59618e-09	NM_014633	CTR9	0
chr1	151198137	151199265	151198226	20	0	2.63074e-09	NM_001330689	PIP5K1A	0
chr15	92900852	92909209	92904010	57	9	2.80423e-09	NM_001042572	CHD2	0
chr13	25241409	25243137	25243126	16	0	2.82266e-09	NM_004685	MTMR6	3064
chr1	28505166	28509279	28506014	21	1	2.86094e-09	NR_030726	RCC1	0
chr3	55160203	55162127	55160376	20	1	2.91258e-09	NR_147142	LINC02017	16045
chr11	102193001	102198040	102197209	20	1	2.93535e-09	NM_001282101	YAP1	0
chr7	124928922	124930361	124929279	21	1	2.99405e-09	NR_003102	POT1	0
chr4	143184459	143184462	143184459	10	0	3.09594e-09	NR_136203	LOC105377623	0
chr2	73233410	73238038	73234155	16	0	3.17814e-09	NR_029403	CCT7	0
chr12	10163364	10163367	10163364	10	0	3.2577e-09	NM_001172633	OLR1	0
chr14	21467874	21467877	21467874	12	0	3.49369e-09	NM_001163380	RAB2B	0
chr10	21373425	21373428	21373425	11	0	3.50869e-09	NM_001010911	CASC10	121064
chr15	82261997	82262000	82261997	10	0	3.53466e-09	NM_001322845	EFL1	0
chr13	98292100	98292529	98292123	12	0	3.67849e-09	NM_001286839	FARP1	0
chrX	48801103	48803518	48803487	15	0	4.1267e-09	NM_001321225	HDAC6	0
chr10	27240084	27243413	27242312	33	3	4.41565e-09	NM_001352570	ACBD5	0
chr19	2168313	2169673	2169106	34	3	4.43455e-09	NM_032482	DOT1L	0
chr3	143000822	143002271	143001284	29	2	4.75403e-09	NR_125393	PAQR9-AS1	0
chr3	33340274	33340278	33340275	11	0	4.85162e-09	NM_001349319	FBXL2	0
chr17	76252082	76252777	76252464	13	0	4.86004e-09	NM_001330501	RNF157	-11771
chr7	135169484	135175542	135171220	27	2	5.05969e-09	NM_001305630	C7orf49	0
chr5	57551609	57553119	57552343	12	0	5.22568e-09	NR_120607	LINCR-0003	17223
chr18	6540540	6546573	6542522	20	1	5.66393e-09	NR_120518	LINC01387	0
chr17	68456265	68456324	68456265	14	0	5.96049e-09	NM_001278433	PRKAR1A	0
chr1	114780246	114781278	114780778	11	0	5.96626e-09	NM_001102396	SIKE1	0
chr12	100473806	100473809	100473806	10	0	6.09374e-09	NM_001206977	NR1H4	0
chr1	8814719	8821802	8817862	19	1	6.17211e-09	NM_012102	RERE	0
chr7	131071658	131077128	131076830	19	1	6.17211e-09	NR_109855	LINC-PINT	0
chr20	45935477	45935745	45935477	19	1	6.17211e-09	NM_022104	PCIF1	0
chr8	23019960	23020403	23020400	19	1	6.17211e-09	NM_001160036	RHOBTB2	0
chr10	110918150	110919066	110918536	19	1	6.17211e-09	NM_001195307	BBIP1	0
chr2	113886735	113886738	113886735	11	0	6.19472e-09	NR_110174	LOC101060091	0
chr17	40108335	40108563	40108560	10	0	6.30068e-09	NM_021724	NR1D1	-7610
chr1	100119378	100119381	100119378	10	0	6.52899e-09	NM_001304829	SASS6	0
chr11	33721257	33725447	33721419	24	0	6.84289e-09	NM_000611	CD59	0
chr5	43120743	43120746	43120743	10	0	6.91897e-09	NM_001330706	ZNF131	97
chr7	7779952	7780147	7780144	12	0	7.16646e-09	NM_001302348	UMAD1	0
chr2	88053367	88054816	88053367	12	0	7.30609e-09	NM_001304526	KRCC1	0
chr4	122921941	122922587	122922262	10	0	7.49264e-09	NM_007083	NUDT6	0
chr20	58647722	58652919	58652657	24	0	7.75862e-09	NM_003763	STX16	0
chr12	101407223	101408895	101408476	13	0	7.98461e-09	NM_001301068	ARL1	0
chr11	107456975	107458317	107457977	28	2	8.07749e-09	NM_152434	CWF19L2	0
chr19	4791387	4791390	4791387	10	0	8.13627e-09	NM_018708	FEM1A	326
chr5	74763646	74767242	74766486	17	0	8.29965e-09	NM_001281302	GFM2	0
chr2	96740324	96740648	96740324	11	0	8.59515e-09	NM_001322350	LMAN2L	-232
chr15	64207428	64207637	64207428	10	0	8.59515e-09	NM_001329605	CSNK1G1	0
chr10	63132993	63140304	63135193	32	3	9.18265e-09	NM_001282405	NRBF2	0
chrX	123962770	123962967	123962964	11	0	9.26708e-09	NM_001042749	STAG2	0
chr4	159248788	159254383	159249157	20	0	9.49547e-09	NM_001351724	RAPGEF2	0
chr2	149586729	149588361	149587454	14	0	9.53896e-09	NM_015702	MMADHC	0
chr21	34157641	34157748	34157641	16	0	1.02222e-08	NM_032476	MRPS6	-14607
chr7	99615605	99620686	99616960	24	0	1.03638e-08	NM_001350979	ZSCAN25	0
chr15	64091693	64096787	64094506	40	6	1.10492e-08	NM_001014812	FAM96A	0
chr19	49084912	49084915	49084912	10	0	1.12987e-08	NM_003089	SNRNP70	225
chr17	68235015	68238226	68235236	14	0	1.13006e-08	NM_001346471	AMZ2	0
chr9	76893396	76894357	76893396	14	0	1.13006e-08	NM_001308047	PRUNE2	0
chr3	52706179	52709295	52706179	18	0	1.15093e-08	NM_014041	SPCS1	0
chr16	13042567	13042745	13042567	11	0	1.16165e-08	NM_001145204	SHISA9	0
chr3	25789204	25789991	25789988	22	1	1.26192e-08	NM_001145294	NGLY1	0
chr16	3880712	3880715	3880712	10	0	1.31094e-08	NM_001079846	CREBBP	-592
chr2	200963227	200964607	200963958	24	1	1.34279e-08	NM_006190	ORC2	0
chr12	110043315	110049211	110048852	24	2	1.34279e-08	NM_207435	C12orf76	0
chr16	72092492	72093928	72093925	24	2	1.34279e-08	NM_001324354	TXNL4B	0
chr2	70246337	70249471	70248724	24	2	1.34279e-08	NR_147231	TIA1	0
chr5	56909923	56911827	56910375	24	2	1.34279e-08	NR_136556	SETD9	0
chr15	101453067	101455919	101455403	20	0	1.3732e-08	NM_001291309	PCSK6	0
chr3	72951404	72952311	72951458	14	0	1.38355e-08	NM_001080393	GXYLT2	0
chr1	43060050	43060337	43060102	16	0	1.4331e-08	NR_033967	SLC2A1-AS1	-76692
chr5	150781865	150783822	150783632	16	0	1.4331e-08	NM_032947	SMIM3	0
chr11	9572745	9577709	9575371	32	3	1.52114e-08	NM_003390	WEE1	0
chr7	94004012	94004629	94004319	12	0	1.5779e-08	NR_133908	BET1	0
chr11	94973727	94974144	94973921	19	0	1.61332e-08	NM_018039	KDM4D	0
chr17	67218752	67219160	67218804	14	0	1.62083e-08	NM_014877	HELZ	0
chr15	35440349	35440500	35440497	12	0	1.67248e-08	NM_080650	DPH6	0
chr7	19560745	19560899	19560745	12	0	1.72268e-08	NM_001002926	TWISTNB	134563
chr14	68814781	68815034	68814944	12	0	1.72268e-08	NM_001244701	ZFP36L1	-18538
chr4	150165045	150165211	150165203	13	0	1.72268e-08	NM_001040260	DCLK2	0
chr6	24666889	24668817	24667670	10	0	1.75481e-08	NM_001160094	ACOT13	0
chr13	110613088	110615381	110615378	12	0	1.83737e-08	NM_001242882	NAXD	79
chr6	19461686	19465966	19465016	19	1	1.86786e-08	NR_134615	LOC105374960	-2338
chr3	27094668	27095225	27095222	10	0	1.99354e-08	NM_001304384	NEK10	15678
chr4	87017464	87020452	87019486	16	0	2.05128e-08	NM_001166693	AFF1	0
chr1	109412304	109412880	109412750	32	4	2.2416e-08	NM_001199772	PSMA5	0
chr2	224042466	224042584	224042581	11	0	2.27091e-08	NM_001136528	SERPINE2	-3147
chr5	78636754	78638719	78636754	13	0	2.31039e-08	NM_005779	LHFPL2	0
chr6	157859719	157860662	157860659	16	0	2.32331e-08	NM_016224	SNX9	0
chr4	143768298	143768551	143768548	11	0	2.40291e-08	NR_134680	LOC105377458	49243
chr4	1294749	1295361	1295358	10	0	2.47433e-08	NM_001017405	MAEA	0
chr4	83032823	83036420	83034768	59	2	2.57736e-08	NM_001258006	COPS4	0
chr1	104706771	104706774	104706771	10	0	2.71362e-08	NR_033990	LOC100129138	-629700
chr6	41920768	41922325	41922185	13	0	2.79837e-08	NR_131160	MED20	0
chr4	185859122	185859166	185859122	12	0	2.79837e-08	NM_001270771	SORBS2	0
chr4	57078409	57081342	57079247	12	0	2.79837e-08	NM_001553	IGFBP7	0
chr12	2336386	2336568	2336386	11	0	2.89747e-08	NM_001129838	CACNA1C	0
chr17	16216087	16218093	16217062	56	11	3.19248e-08	NM_004278	PIGL	0
chr1	16609278	16613636	16612578	14	0	3.30408e-08	NM_017940	NBPF1	0
chr3	193686799	193689255	193686823	14	0	3.4923e-08	NM_130834	OPA1	0
chr4	184534381	184537860	184537058	36	5	3.57123e-08	NR_147158	LINC02427	0
chr17	44186884	44187881	44187589	36	5	3.57123e-08	NM_001353186	TMUB2	0
chr22	39946614	39946673	39946670	11	0	3.60659e-08	NM_004810	GRAP2	0
chr18	21598372	21599627	21599624	10	0	3.68979e-08	NM_052911	ESCO1	0
chr13	32504139	32504338	32504139	10	0	3.75437e-08	NM_001320836	N4BP2L2	0
chr1	244834474	244835884	244834993	12	0	3.91023e-08	NM_001312871	COX20	0
chr7	75528281	75528284	75528281	14	0	3.94142e-08	NR_028059	PMS2P3	-158
chr2	163799971	163801253	163801205	11	0	4.04792e-08	NM_001321825	FIGN	-63964
chr5	142024439	142025369	142024831	10	0	4.08293e-08	NM_005471	GNPDA1	-11384
chr14	96876944	96877047	96876944	11	0	4.26592e-08	NM_003384	VRK1	0
chr22	46470204	46470207	46470204	10	0	4.26592e-08	NM_014246	CELSR1	0
chr8	78665731	78667088	78665731	10	0	4.26592e-08	NM_016010	ZC2HC1A	0
chrX	120603596	120604439	120604436	12	0	4.40907e-08	NM_014060	MCTS1	0
chr12	91369421	91370301	91370298	10	0	4.56747e-08	NM_001920	DCN	-186297
chr2	156335069	156335501	156335155	11	0	4.63206e-08	NR_147695	FLJ46875	1071
chr5	64769054	64770061	64769054	11	0	4.67596e-08	NM_005869	CWC27	0
chr17	4555473	4556162	4555473	19	1	4.75599e-08	NM_001105538	MYBBP1A	-87
chr6	132445205	132446479	132446038	19	0	4.75599e-08	NM_001326579	STX7	11045
chr5	154857638	154859078	154857638	11	0	4.76587e-08	NM_001301083	CNOT8	0
chr2	190318805	190320173	190319018	20	0	4.76757e-08	NM_198047	HIBCH	0
chr9	92877483	92878507	92878504	11	0	4.9062e-08	NM_001007101	ZNF484	0
chr15	39539656	39539849	39539802	11	0	4.9062e-08	NM_003246	THBS1	41230
chr13	41060407	41060684	41060681	13	0	4.99504e-08	NM_007187	WBP4	573
chr12	30792150	30797207	30795319	12	0	4.99504e-08	NR_040245	LINC00941	0
chr4	123699776	123701324	123699941	13	0	5.26932e-08	NR_027105	LINC01091	0
chr1	85706882	85709223	85708812	20	1	5.28169e-08	NM_001170670	ZNHIT6	0
chr1	84478333	84481926	84479474	24	2	5.34996e-08	NM_025065	RPF1	0
chr17	75780288	75786133	75780663	27	3	5.37935e-08	NR_039892	MIR4738	0
chr19	56837444	56841116	56838065	10	0	5.42678e-08	NM_001146326	ZIM2	0
chr3	186567729	186570141	186568139	12	0	5.68734e-08	NM_001134415	TBCCD1	0
chr16	57671300	57671303	57671300	11	0	5.72182e-08	NM_001308360	ADGRG3	0
chr2	183133505	183133657	183133505	10	0	5.72182e-08	NM_001287584	NUP35	0
chr8	60784223	60786078	60785272	12	0	6.11243e-08	NM_017780	CHD7	0
chr7	20561369	20561512	20561509	13	0	6.21969e-08	NM_001163941	ABCB5	54110
chr15	60478540	60479105	60479102	17	1	6.22362e-08	NR_147171	ICE2	0
chr8	66532641	66536145	66535321	17	1	6.22362e-08	NM_152765	C8orf46	-14117
chr1	44739444	44739838	44739444	17	1	6.22362e-08	NM_006845	KIF2C	0
chr9	122827381	122828895	122828761	18	1	6.22362e-08	NM_005388	PDCL	0
chr2	231743724	231744286	231744041	17	1	6.22362e-08	NM_001291018	PDE6D	0
chr10	91023031	91024699	91024696	17	0	6.22362e-08	NR_134319	LOC105378430	8467
chr2	119819778	119820275	119820222	17	1	6.22362e-08	NM_002830	PTPN4	0
chr8	54133738	54135928	54134234	17	1	6.22362e-08	NM_014175	MRPL15	0
chr3	53346428	53350869	53347116	18	1	6.22362e-08	NM_001290204	DCP1A	0
chr14	64388230	64388419	64388230	18	1	6.22362e-08	NM_005956	MTHFD1	0
chr1	151763769	151766883	151764105	18	1	6.22362e-08	NM_001300733	MRPL9	0
chr15	77045570	77046373	77046240	18	1	6.22362e-08	NM_001168412	TSPAN3	0
chr19	4910691	4911895	4911284	18	1	6.22362e-08	NM_001290050	UHRF1	0
chr8	48515211	48515877	48515514	17	1	6.22362e-08	NR_105002	LOC101929268	35690
chr18	68714557	68715276	68715273	17	1	6.22362e-08	NM_001350514	TMX3	0
chr3	101572744	101574912	101573713	18	1	6.22362e-08	NR_135228	PCNP	0
chr3	190444485	190444873	190444695	18	1	6.22362e-08	NM_207316	TMEM207	0
chr7	105302410	105307564	105304126	18	1	6.22362e-08	NM_001350746	SRPK2	0
chrX	77895801	77900668	77895970	18	1	6.22362e-08	NM_001866	COX7B	0
chr14	55389174	55389847	55389604	18	1	6.22362e-08	NM_014924	ATG14	0
chr14	69226988	69226991	69226988	10	0	6.3958e-08	NM_001193360	EXD2	0
chr5	142490997	142491696	142491502	14	0	6.56384e-08	NR_120664	SPRY4-AS1	-26943
chr7	134164143	134165305	134164143	12	0	6.6402e-08	NM_144648	LRGUK	0
chr21	44869269	44870774	44869906	12	0	6.6402e-08	NR_104597	PTTG1IP	0
chr4	174283695	174285297	174283695	10	0	6.67297e-08	NM_012180	FBXO8	0
chr10	13703692	13707344	13705125	12	0	6.76126e-08	NM_001318338	FRMD4A	0
chr1	73847192	73847195	73847192	10	0	6.78187e-08	NR_146300	LINC02238	-108550
chr10	94543308	94549901	94545347	21	1	6.79203e-08	NM_001289075	HELLS	0
chr2	24221088	24221241	24221135	10	0	7.20635e-08	NM_019595	ITSN2	0
chr6	16745109	16750291	16747345	9	0	7.49085e-08	NM_000332	ATXN1	0
chr1	6188541	6188549	6188542	9	0	7.49085e-08	NM_000983	RPL22	0
chrX	76146023	76148518	76146530	9	0	7.49085e-08	NM_001300888	PBDC1	24411
chr3	180872094	180872098	180872095	9	0	7.49085e-08	NR_109986	LOC101928882	-1916
chr11	64269852	64271617	64269852	9	0	7.49085e-08	NM_004322	BAD	0
chrX	150062598	150062840	150062837	9	0	7.49085e-08	NR_027456	LINC00894	-45811
chrX	67780696	67781269	67780826	9	0	7.49085e-08	NM_000044	AR	-50077
chr6	141591957	141591960	141591957	9	0	7.49085e-08	NM_002511	NMBR	482524
chr10	116801068	116803739	116801068	9	0	7.49085e-08	NM_001330164	HSPA12A	0
chr4	48722743	48726728	48725493	9	0	7.49085e-08	NM_015030	FRYL	0
chr17	80415938	80415941	80415938	9	0	7.49085e-08	NM_001164637	ENDOV	0
chr12	25082934	25082937	25082934	9	0	7.49085e-08	NM_001204126	LRMP	0
chr4	39947111	39950266	39950263	9	0	7.49085e-08	NM_001100399	PDS5A	0
chr18	5238298	5238405	5238402	9	0	7.49085e-08	NR_015389	LINC00667	0
chr1	2968640	2968643	2968640	9	0	7.49085e-08	NM_080431	ACTRT2	52839
chr3	158241649	158242892	158241649	9	0	7.49085e-08	NM_001271834	RSRC1	0
chr18	74475307	74476237	74475307	9	0	7.49085e-08	NM_001044369	FAM69C	-18039
chr3	157985516	157985519	157985516	9	0	7.49085e-08	NM_001163678	SHOX2	110492
chr1	2257270	2261744	2260068	9	0	7.49085e-08	NM_003036	SKI	0
chr4	67701468	67707228	67701582	9	0	7.49085e-08	NR_015439	UBA6-AS1	0
chrX	100643540	100646577	100643540	9	0	7.49085e-08	NM_014467	SRPX2	0
chr18	24015583	24016327	24016324	9	0	7.49085e-08	NM_153211	TTC39C	0
chr10	102245862	102248323	102248194	9	0	7.49085e-08	NM_001199378	GBF1	0
chr1	234433658	234434011	234433658	9	0	7.49085e-08	NM_005646	TARBP1	0
chr10	102311119	102311954	102311206	9	0	7.49085e-08	NM_001199378	GBF1	0
chr19	12946445	12946448	12946445	9	0	7.49085e-08	NM_001270363	RAD23A	0
chr6	47132123	47134912	47132123	9	0	7.49085e-08	NM_153840	ADGRF1	-89760
chr6	39193069	39193692	39193616	9	0	7.49085e-08	NM_003740	KCNK5	0
chr11	70542230	70542233	70542230	9	0	7.49085e-08	NM_133266	SHANK2	0
chr12	1103649	1108567	1108564	9	0	7.49085e-08	NM_178040	ERC1	0
chr6	48061748	48065239	48061748	9	0	7.49085e-08	NM_001013732	PTCHD4	0
chr6	150592547	150592762	150592759	9	0	7.49085e-08	NR_138138	PLEKHG1	7103
chr1	192349380	192351163	192351160	9	0	7.49085e-08	NM_001039152	RGS21	0
chr1	13763437	13768010	13768007	9	0	7.49085e-08	NM_001135610	PRDM2	0
chr6	144343966	144344351	144343966	9	0	7.49085e-08	NM_007124	UTRN	0
chr1	7546871	7549629	7549599	9	0	7.49085e-08	NM_001349609	CAMTA1	0
chr17	69577866	69580566	69580563	9	0	7.49085e-08	NR_109971	LINC01483	13421
chr3	138125274	138128140	138125274	9	0	7.49085e-08	NM_016161	A4GNT	0
chr2	9405325	9409272	9409269	9	0	7.49085e-08	NM_001135191	ASAP2	0
chr3	150414587	150414762	150414759	9	0	7.49085e-08	NM_014779	TSC22D2	0
chr4	7828179	7828351	7828348	9	0	7.49085e-08	NM_001134647	AFAP1	0
chr6	36983323	36987004	36985001	9	0	7.49085e-08	NR_130739	MTCH1	0
chr11	62591164	62593775	62593772	9	0	7.49085e-08	NM_022830	TUT1	0
chrX	149618977	149619305	149618977	9	0	7.49085e-08	NM_001174092	TMEM185A	0
chr18	3282733	3283933	3283001	9	0	7.49085e-08	NM_033546	MYL12B	-4449
chr6	70412833	70413180	70413177	9	0	7.49085e-08	NR_147708	LOC105377849	0
chr18	46806874	46806877	46806874	9	0	7.49085e-08	NM_001324049	PIAS2	0
chr11	96012337	96014429	96012337	9	0	7.49085e-08	NM_032427	MAML2	0
chr11	68903282	68904605	68904247	9	0	7.49085e-08	NM_181514	MRPL21	0
chr1	220262653	220267424	220262653	9	0	7.49085e-08	NM_012414	RAB3GAP2	0
chr11	35337233	35337286	35337283	9	0	7.49085e-08	NM_001195728	SLC1A2	0
chr11	34681269	34681285	34681269	9	0	7.49085e-08	NM_012153	EHF	-17982
chr11	91491926	91491929	91491926	9	0	7.49085e-08	NR_104190	DISC1FP1	-576874
chr4	2468620	2472186	2470098	9	0	7.49085e-08	NM_001185010	RNF4	0
chr3	171286903	171291460	171291457	9	0	7.49085e-08	NM_001161564	TNIK	0
chr17	82519085	82523328	82519085	9	0	7.49085e-08	NM_004514	FOXK2	0
chr12	12883389	12883454	12883389	9	0	7.49085e-08	NR_003932	RPL13AP20	-7253
chr6	65189713	65189716	65189713	9	0	7.49085e-08	NM_001142800	EYS	0
chr6	21158848	21163539	21159623	9	0	7.49085e-08	NM_017774	CDKAL1	0
chr1	10996150	10996153	10996150	9	0	7.49085e-08	NM_001170754	C1orf127	-14113
chr1	235830993	235834590	235834587	9	0	7.49085e-08	NM_000081	LYST	0
chr19	4973090	4973171	4973168	9	0	7.49085e-08	NM_015015	KDM4B	0
chr12	18193121	18193124	18193121	9	0	7.49085e-08	NM_001288774	PIK3C2G	68416
chr19	8457962	8461381	8461337	9	0	7.49085e-08	NM_001297418	HNRNPM	0
chr19	7068008	7070425	7069153	9	0	7.49085e-08	NM_001044388	ZNF557	0
chr17	75257835	75260693	75257835	9	0	7.49085e-08	NM_001172704	GGA3	0
chr4	38804828	38805818	38805293	9	0	7.49085e-08	NM_003263	TLR1	-37
chr10	124414256	124417248	124414256	9	0	7.49085e-08	NM_001322974	OAT	0
chr11	74492605	74493081	74493078	9	0	7.49085e-08	NM_001144869	LIPT2	0
chr11	106021922	106022629	106022626	9	0	7.49085e-08	NM_001318750	MSANTD4	0
chr10	130109926	130111765	130111762	9	0	7.49085e-08	NR_034125	LINC00959	0
chr10	130299414	130302152	130301997	9	0	7.49085e-08	NM_001199868	GLRX3	-119032
chr18	35241401	35241561	35241401	9	0	7.49085e-08	NM_001135178	ZNF397	0
chr4	30724370	30730992	30729774	9	0	7.49085e-08	NM_032456	PCDH7	0
chr6	53837827	53841548	53838226	9	0	7.49085e-08	NM_018214	LRRC1	0
chr19	6503861	6505081	6503861	9	0	7.49085e-08	NM_001289129	TUBB4A	-1013
chr11	1783019	1783130	1783092	9	0	7.49085e-08	NM_001909	CTSD	-19027
chr6	37673979	37674001	37673979	9	0	7.49085e-08	NM_153487	MDGA1	0
chr1	12075783	12080414	12080411	9	0	7.49085e-08	NM_001243	TNFRSF8	0
chr19	5947016	5950908	5948913	9	0	7.49085e-08	NM_001300865	RANBP3	0
chr4	22073768	22073771	22073768	9	0	7.49085e-08	NM_147182	KCNIP4	-125017
chr11	74505205	74508644	74505205	9	0	7.49085e-08	NM_001319240	LOC100287896	-6672
chr1	9448698	9451572	9448698	9	0	7.49085e-08	NR_104622	LOC100506022	-19702
chr11	9760357	9760360	9760357	9	0	7.49085e-08	NR_036485	SBF2-AS1	0
chr4	38889364	38889636	38889443	9	0	7.49085e-08	NM_001350635	FAM114A1	0
chr11	14380711	14380714	14380711	9	0	7.49085e-08	NM_001177314	RRAS2	-16205
chr5	143214390	143218193	143214390	9	0	7.49085e-08	NR_146198	ARHGAP26	0
chr10	94251137	94253667	94251323	9	0	7.49085e-08	NM_001288989	PLCE1	0
chr5	170303219	170307902	170307899	9	0	7.49085e-08	NR_147701	LOC100128059	799
chr5	59511004	59515041	59515038	9	0	7.49085e-08	NM_001349243	PDE4D	0
chr1	75785116	75789880	75786017	9	0	7.49085e-08	NM_004582	RABGGTB	0
chr5	60989905	60991704	60989905	9	0	7.49085e-08	NM_174889	NDUFAF2	0
chr5	62900013	62904385	62900013	9	0	7.49085e-08	NM_016338	IPO11	-271424
chr5	168410095	168410418	168410232	9	0	7.49085e-08	NM_015238	WWC1	0
chr8	73878090	73880037	73878090	9	0	7.49085e-08	NM_001271015	UBE2W	0
chr1	27436983	27438704	27436983	9	0	7.49085e-08	NM_006990	WASF2	0
chr20	50725181	50725463	50725181	9	0	7.49085e-08	NM_032521	PARD6B	6081
chr8	41792496	41792499	41792496	9	0	7.49085e-08	NM_020477	ANK1	0
chr8	38294520	38294523	38294520	9	0	7.49085e-08	NM_023034	NSD3	0
chr5	75331580	75332071	75331827	9	0	7.49085e-08	NM_001130996	HMGCR	5097
chr5	160477600	160477705	160477702	9	0	7.49085e-08	NR_132748	MIR3142HG	0
chr1	64981311	64981314	64981311	9	0	7.49085e-08	NM_001321852	JAK1	0
chr1	68232548	68236187	68233165	9	0	7.49085e-08	NM_024911	WLS	0
chr1	77604661	77605399	77605226	9	0	7.49085e-08	NM_015534	ZZZ3	0
chr20	41015025	41015497	41015025	9	0	7.49085e-08	NR_145524	LOC100128988	0
chr5	54701582	54702648	54701582	9	0	7.49085e-08	NR_104658	LOC102467080	0
chr5	16322668	16322671	16322668	9	0	7.49085e-08	NR_104625	LINC02150	50690
chr7	35038387	35038390	35038387	9	0	7.49085e-08	NM_015283	DPY19L1	-346
chr20	8116653	8119401	8116733	9	0	7.49085e-08	NM_015192	PLCB1	12864
chr5	22506218	22506221	22506218	9	0	7.49085e-08	NM_004061	CDH12	0
chr8	134463637	134463640	134463637	9	0	7.49085e-08	NM_001029939	ZFAT	14148
chr7	36602408	36602411	36602408	9	0	7.49085e-08	NM_001177506	AOAH	0
chr8	125334098	125334129	125334126	9	0	7.49085e-08	NM_001349485	NSMCE2	0
chr8	123989974	123989977	123989974	9	0	7.49085e-08	NM_001039112	FER1L6	0
chr5	38264157	38265851	38265848	9	0	7.49085e-08	NM_152403	EGFLAM	0
chr20	34675884	34678123	34677975	9	0	7.49085e-08	NM_080476	PIGU	0
chr20	35277341	35282546	35277952	9	0	7.49085e-08	NR_102705	MMP24-AS1	0
chr5	42404809	42406512	42406509	9	0	7.49085e-08	NM_000163	GHR	17263
chr8	119863294	119863432	119863294	9	0	7.49085e-08	NM_024094	DSCC1	-7364
chr8	111864059	111864439	111864059	9	0	7.49085e-08	NM_198124	CSMD3	358491
chr7	39952770	39957762	39953962	9	0	7.49085e-08	NM_003718	CDK13	0
chr8	29610648	29611994	29611991	9	0	7.49085e-08	NR_026765	LINC00589	109266
chr22	41590168	41595142	41590168	9	0	7.49085e-08	NM_002676	PMM1	-301
chr1	61092459	61094001	61093998	9	0	7.49085e-08	NM_001145511	NFIA	0
chr5	157731222	157731463	157731460	9	0	7.49085e-08	NM_017872	THG1L	0
chr22	27181549	27181552	27181549	9	0	7.49085e-08	NM_001318392	LOC105372977	5964
chr22	29553936	29554095	29553936	9	0	7.49085e-08	NM_001002877	THOC5	-189
chr5	138331093	138332152	138331395	9	0	7.49085e-08	NM_022809	CDC25C	0
chr1	40164312	40165120	40164510	9	0	7.49085e-08	NM_012421	RLF	0
chr22	37684451	37686277	37686274	9	0	7.49085e-08	NR_039973	MIR5096	0
chr7	93117656	93118733	93118730	9	0	7.49085e-08	NM_001193307	SAMD9	0
chr5	138588874	138593148	138593145	9	0	7.49085e-08	NM_004134	HSPA9	-13245
chr5	140281741	140282448	140282445	9	0	7.49085e-08	NM_002622	PFDN1	0
chr1	39012058	39013604	39012058	9	0	7.49085e-08	NM_001136275	AKIRIN1	-5993
chr7	96800520	96801154	96801151	9	0	7.49085e-08	NM_006304	SEM1	-90629
chr7	100335795	100335798	100335795	9	0	7.49085e-08	NR_003613	PMS2P1	0
chr7	97307557	97307560	97307557	9	0	7.49085e-08	NM_020186	SDHAF3	-125794
chr22	35624534	35631902	35627285	9	0	7.49085e-08	NM_203377	MB	-1180
chr7	100100947	100101622	100100947	9	0	7.49085e-08	NM_005916	MCM7	0
chr5	141848553	141850915	141849055	9	0	7.49085e-08	NM_032420	PCDH1	2196
chr5	131458039	131458042	131458039	9	0	7.49085e-08	NM_001164387	RAPGEF6	0
chr20	5746944	5751261	5746944	9	0	7.49085e-08	NM_001303479	C20orf196	0
chr22	20480065	20480151	20480065	9	0	7.49085e-08	NM_032775	KLHL22	0
chr5	151640496	151641560	151640939	9	0	7.49085e-08	NM_003118	SPARC	19536
chr21	36355070	36355473	36355136	9	0	7.49085e-08	NM_015358	MORC3	0
chr8	16826291	16830978	16826291	9	0	7.49085e-08	NM_019851	FGF20	161847
chr7	158818287	158822870	158820851	9	0	7.49085e-08	NM_020728	ESYT2	0
chr5	102789212	102789748	102789745	9	0	7.49085e-08	NM_001319943	PAM	0
chr7	157338934	157340225	157340222	9	0	7.49085e-08	NM_005494	DNAJB6	0
chr1	54200970	54204479	54202444	9	0	7.49085e-08	NM_001330602	MRPL37	0
chr7	155768583	155772037	155769843	9	0	7.49085e-08	NM_053043	RBM33	0
chr21	37645364	37645367	37645364	9	0	7.49085e-08	NM_002240	KCNJ6	0
chr1	28063878	28068759	28066218	9	0	7.49085e-08	NM_001990	EYA3	0
chr1	52054732	52059639	52055291	9	0	7.49085e-08	NM_015913	TXNDC12	0
chr21	38303629	38306846	38306573	9	0	7.49085e-08	NM_001276439	KCNJ15	-1805
chr21	38443123	38444757	38443124	9	0	7.49085e-08	NM_001243432	ERG	0
chr1	28924107	28927997	28927241	9	0	7.49085e-08	NM_203343	EPB41	0
chr1	45677544	45681622	45677852	9	0	7.49085e-08	NM_021639	GPBP1L1	0
chr1	45600143	45602165	45600256	9	0	7.49085e-08	NM_152298	NASP	0
chr1	45011844	45012465	45012226	9	0	7.49085e-08	NM_000374	UROD	0
chrX	53224366	53225477	53224936	9	0	7.49085e-08	NM_001146702	KDM5C	0
chr7	29987379	29991641	29987647	9	0	7.49085e-08	NM_001145515	SCRN1	0
chr9	18808209	18808212	18808209	9	0	7.49085e-08	NM_001040272	ADAMTSL1	0
chr4	110671558	110671674	110671671	9	0	7.49085e-08	NM_001204397	PITX2	-29435
chr19	42656328	42656331	42656328	9	0	7.49085e-08	NR_073180	LIPE-AS1	-3973
chr10	6399303	6399375	6399303	9	0	7.49085e-08	NM_001323267	PRKCQ	0
chr10	6219509	6219790	6219509	9	0	7.49085e-08	NM_001145443	PFKFB3	0
chr4	121179302	121182456	121179302	9	0	7.49085e-08	NM_001128843	TNIP3	0
chr10	4257040	4257669	4257040	9	0	7.49085e-08	NR_108040	LINC00702	-13128
chr1	160622444	160625280	160623771	9	0	7.49085e-08	NM_001330754	SLAMF1	0
chr10	3452175	3452363	3452275	9	0	7.49085e-08	NR_131187	LOC105376360	0
chr10	677397	677412	677409	9	0	7.49085e-08	NM_014974	DIP2C	0
chr10	663414	665120	664655	9	0	7.49085e-08	NM_014974	DIP2C	0
chrX	40465941	40465944	40465941	9	0	7.49085e-08	NM_005765	ATP6AP2	115020
chr9	136847874	136849226	136849223	9	0	7.49085e-08	NM_001135861	PHPT1	0
chr7	4641446	4642832	4641446	9	0	7.49085e-08	NM_001037165	FOXK1	39467
chr4	137550328	137550332	137550328	9	0	7.49085e-08	NR_146553	LINC02172	0
chr1	155797076	155797134	155797131	9	0	7.49085e-08	NM_001282858	GON4L	0
chr10	15857191	15862520	15858304	9	0	7.49085e-08	NM_024948	MINDY3	0
chr10	16942284	16945688	16942284	9	0	7.49085e-08	NM_001081	CUBN	0
chr10	17835431	17835434	17835431	9	0	7.49085e-08	NM_002438	MRC1	0
chr10	88728119	88732118	88732115	9	0	7.49085e-08	NM_001080518	LIPK	0
chr19	17508168	17513100	17511332	9	0	7.49085e-08	NR_147835	LOC100507551	0
chr1	17052562	17053359	17053356	9	0	7.49085e-08	NM_003000	SDHB	0
chr19	19989889	19989892	19989889	9	0	7.49085e-08	NM_001077349	ZNF682	14526
chr10	76185803	76185902	76185899	9	0	7.49085e-08	NM_001305581	LRMDA	0
chr19	27793012	27794256	27793286	9	0	7.49085e-08	NR_027301	LINC00662	0
chr10	63708735	63713275	63712142	9	0	7.49085e-08	NM_001001330	REEP3	-83612
chr6	158576760	158581082	158577201	9	0	7.49085e-08	NM_020823	TMEM181	0
chr19	37210468	37210641	37210468	9	0	7.49085e-08	NM_152279	ZNF585B	0
chr10	48210142	48210145	48210142	9	0	7.49085e-08	NM_001318191	FRMPD2	0
chrX	48696797	48696800	48696797	9	0	7.49085e-08	NM_001282166	SUV39H1	0
chr10	35334810	35337506	35335289	9	0	7.49085e-08	NM_181698	CCNY	0
chr10	28623557	28628715	28623557	9	0	7.49085e-08	NM_100264	WAC	-445
chr1	19606954	19607090	19607087	9	0	7.49085e-08	NM_001204089	MINOS1-NBL1	0
chr10	18523344	18523448	18523344	9	0	7.49085e-08	NM_201596	CACNB2	0
chr9	133874474	133874477	133874474	9	0	7.49085e-08	NM_001134398	VAV2	0
chr22	36978057	36981005	36980788	9	0	7.49085e-08	NR_038954	LL22NC01-81G9.3	-9885
chrX	23818493	23818634	23818631	9	0	7.49085e-08	NM_024122	APOO	14714
chr4	139388782	139392722	139388782	9	0	7.49085e-08	NM_057175	NAA15	0
chr1	115667271	115669144	115667271	9	0	7.49085e-08	NM_001172411	VANGL1	0
chr4	177762425	177762428	177762425	9	0	7.49085e-08	NR_028342	LINC01098	0
chr5	181167354	181169178	181167354	9	0	7.49085e-08	NM_206880	OR2V2	-11464
chr7	13729783	13732940	13732937	9	0	7.49085e-08	NM_001163150	ETV1	158291
chr1	111442792	111442795	111442792	9	0	7.49085e-08	NM_001317062	WDR77	0
chr1	110463034	110463855	110463034	9	0	7.49085e-08	NM_032414	PROK1	-5680
chr4	183905737	183908280	183905737	9	0	7.49085e-08	NR_132761	STOX2	0
chr4	184329513	184330395	184330086	9	0	7.49085e-08	NR_040108	LINC02363	10636
chr1	23528291	23531419	23528291	9	0	7.49085e-08	NM_004091	E2F2	0
chr9	37464693	37468983	37466081	9	0	7.49085e-08	NM_014872	ZBTB5	0
chr1	109398943	109402326	109402323	9	0	7.49085e-08	NM_001199772	PSMA5	0
chrX	16808197	16808200	16808197	9	0	7.49085e-08	NM_018360	TXLNG	0
chr5	178203058	178207882	178207879	9	0	7.49085e-08	NM_004499	HNRNPAB	0
chr5	177554833	177559702	177559699	9	0	7.49085e-08	NM_001190946	FAM193B	-248
chr12	26353328	26353331	26353328	9	0	7.49085e-08	NM_002223	ITPR2	0
chr9	96339538	96340018	96339636	9	0	7.49085e-08	NR_104627	SLC35D2	0
chr5	177300199	177300530	177300527	9	0	7.49085e-08	NM_172349	NSD1	0
chr19	52524457	52529521	52527734	9	0	7.49085e-08	NM_001321425	ZNF808	0
chr9	97921088	97923951	97922831	9	0	7.49085e-08	NM_016481	TRMO	0
chrX	20245330	20248756	20248753	9	0	7.49085e-08	NM_004586	RPS6KA3	0
chr1	153976609	153977180	153976609	9	0	7.49085e-08	NM_006694	JTB	0
chr4	140372134	140373063	140373060	9	0	7.49085e-08	NM_032547	SCOC	0
chr4	140721777	140728379	140724299	9	0	7.49085e-08	NM_015130	TBC1D9	0
chr9	129834545	129835051	129834545	9	0	7.49085e-08	NM_016520	C9orf78	0
chr1	151070797	151070864	151070797	9	0	7.49085e-08	NM_001323907	GABPB2	0
chr9	126831504	126832133	126832129	9	0	7.49085e-08	NM_001135776	ZBTB43	0
chr1	150876151	150876967	150876964	9	0	7.49085e-08	NM_001197325	ARNT	0
chr19	48353950	48355040	48354497	9	0	7.49085e-08	NM_001303540	TMEM143	0
chr9	124627297	124631471	124627297	9	0	7.49085e-08	NM_001278546	NR6A1	0
chr9	122251637	122252882	122251637	9	0	7.49085e-08	NR_027126	RBM18	0
chr1	148421598	148425797	148425794	9	0	7.49085e-08	NR_111930	LOC100132057	0
chr9	108049310	108049313	108049310	9	0	7.49085e-08	NM_004235	KLF4	-559590
chr9	107634928	107638533	107638530	9	0	7.49085e-08	NM_004235	KLF4	-145208
chr9	106994753	106994756	106994753	9	0	7.49085e-08	NM_001347997	ZNF462	0
chr4	169640700	169645278	169640700	9	0	7.49085e-08	NM_001243372	CLCN3	0
chr5	6711768	6716648	6716437	9	0	7.49085e-08	NM_001171805	PAPD7	0
chr15	70474457	70475947	70475274	9	0	7.49085e-08	NR_146562	LINC02205	27960
chr12	105745281	105745284	105745281	9	0	7.49085e-08	NR_110108	CASC18	-1218
chr12	88743199	88744409	88744406	9	0	7.49085e-08	NM_003994	KITLG	-162726
chr3	105835801	105837206	105836888	9	0	7.49085e-08	NM_001321807	CBLB	0
chr17	42880874	42880877	42880874	9	0	7.49085e-08	NR_027254	LINC00671	0
chr15	99703614	99703666	99703663	9	0	7.49085e-08	NM_001352617	MEF2A	0
chr13	77808896	77811291	77808896	9	0	7.49085e-08	NR_103853	EDNRB-AS1	7646
chr12	92085642	92089505	92085931	9	0	7.49085e-08	NR_132340	LINC01619	0
chr13	40565048	40565051	40565048	9	0	7.49085e-08	NM_002015	FOXO1	0
chr15	101168234	101169367	101168234	9	0	7.49085e-08	NM_014918	CHSY1	6356
chr16	74984483	74984607	74984483	9	0	7.49085e-08	NM_030581	WDR59	0
chr12	92359307	92360618	92359307	9	0	7.49085e-08	NM_001025232	CLLU1OS	59476
chr3	20234289	20234292	20234289	9	0	7.49085e-08	NM_001012410	SGO1	-48056
chr12	93416402	93422052	93419683	9	0	7.49085e-08	NM_003348	UBE2N	0
chr16	75305178	75306481	75305814	9	0	7.49085e-08	NM_006324	CFDP1	0
chr2	44242784	44246786	44246233	9	0	7.49085e-08	NM_177968	PPM1B	-8181
chr12	51320650	51320783	51320780	9	0	7.49085e-08	NM_001290007	BIN2	0
chr12	101773676	101777863	101777860	9	0	7.49085e-08	NM_024312	GNPTAB	0
chr2	45855980	45860928	45857375	9	0	7.49085e-08	NM_005400	PRKCE	0
chr14	90255970	90259307	90257085	9	0	7.49085e-08	NM_002802	PSMC1	0
chr13	67115139	67117520	67117517	9	0	7.49085e-08	NM_001318372	PCDH9	0
chr2	85561721	85562335	85561721	9	0	7.49085e-08	NM_000821	GGCX	-187
chr16	57014745	57014748	57014745	9	0	7.49085e-08	NM_001330552	NLRC5	0
chr17	45188571	45188574	45188571	9	0	7.49085e-08	NR_147507	LOC339192	2357
chr14	87013434	87013437	87013434	9	0	7.49085e-08	NR_038445	LINC01148	-90679
chr16	75555192	75556480	75555438	9	0	7.49085e-08	NM_001077416	TMEM231	0
chr13	37126329	37128355	37128352	9	0	7.49085e-08	NM_145203	CSNK1A1L	-20665
chr3	62006155	62007437	62007140	9	0	7.49085e-08	NM_002841	PTPRG	0
chr3	57803874	57803978	57803975	9	0	7.49085e-08	NM_001304420	SLMAP	0
chr14	80383801	80387703	80383801	9	0	7.49085e-08	NR_038355	DIO2-AS1	0
chr16	1419679	1424267	1421358	9	0	7.49085e-08	NM_001272051	C16orf91	0
chr14	95292568	95297352	95292568	9	0	7.49085e-08	NM_024734	CLMN	0
chr12	106772201	106774401	106773797	9	0	7.49085e-08	NR_040246	LOC100287944	0
chr3	69268624	69268858	69268624	9	0	7.49085e-08	NM_015123	FRMD4B	0
chr2	201231063	201234866	201231552	9	0	7.49085e-08	NM_033355	CASP8	0
chr12	61478147	61479417	61478147	9	0	7.49085e-08	NM_178539	FAM19A2	228831
chr12	58495241	58496579	58496576	9	0	7.49085e-08	NR_120452	LINC02388	69380
chr15	83053259	83057022	83053259	9	0	7.49085e-08	NM_001011885	BTBD1	0
chr15	89124358	89124361	89124358	9	0	7.49085e-08	NM_007011	ABHD2	0
chr17	32792340	32796919	32796916	9	0	7.49085e-08	NM_015194	MYO1D	0
chr2	187526494	187531082	187527551	9	0	7.49085e-08	NM_006287	TFPI	0
chr17	35075606	35077567	35075860	9	0	7.49085e-08	NR_037713	RFFL	0
chr12	56674018	56677749	56677746	9	0	7.49085e-08	NM_001282603	PTGES3	0
chr13	72726783	72729077	72727921	9	0	7.49085e-08	NM_001071775	MZT1	0
chr12	63501899	63501902	63501899	9	0	7.49085e-08	NM_173812	DPY19L2	57011
chr15	90481020	90484370	90481020	9	0	7.49085e-08	NM_003870	IQGAP1	0
chr2	34174527	34175881	34174626	9	0	7.49085e-08	NR_126403	LINC01317	0
chr14	103476594	103476911	103476908	9	0	7.49085e-08	NM_001128918	MARK3	0
chr2	181153044	181153361	181153358	9	0	7.49085e-08	NR_130784	LINC01934	0
chr17	29968571	29968574	29968571	9	0	7.49085e-08	NM_001145053	EFCAB5	0
chr12	66036220	66036922	66036220	9	0	7.49085e-08	NR_146530	LINC02425	-5154
chr3	79297246	79297249	79297246	9	0	7.49085e-08	NM_002941	ROBO1	0
chr12	68746220	68747577	68747574	9	0	7.49085e-08	NM_018656	SLC35E3	0
chr12	69492730	69493862	69492965	9	0	7.49085e-08	NM_001278351	FRS2	0
chr3	32554736	32558336	32556445	9	0	7.49085e-08	NM_016141	DYNC1LI1	0
chr17	28936109	28937572	28937569	9	0	7.49085e-08	NM_001033561	PHF12	0
chr2	42905874	42907230	42906992	9	0	7.49085e-08	NM_012205	HAAO	-113263
chr12	71839232	71840849	71839232	9	0	7.49085e-08	NM_001146213	TBC1D15	0
chr3	72996274	72997795	72997487	9	0	7.49085e-08	NM_001318026	PPP4R2	0
chr16	57260561	57260564	57260561	9	0	7.49085e-08	NM_015993	PLLP	0
chr3	22297913	22297916	22297913	9	0	7.49085e-08	NR_046876	ZNF385D-AS2	-318085
chr12	85225408	85225535	85225408	9	0	7.49085e-08	NM_001079910	LRRIQ1	0
chr2	105143784	105143787	105143784	9	0	7.49085e-08	NR_136172	LINC01918	326
chr12	53938534	53938885	53938534	9	0	7.49085e-08	NR_047507	HOXC13-AS	0
chr2	43676291	43676294	43676291	9	0	7.49085e-08	NM_172069	PLEKHH2	0
chr13	110726479	110726482	110726479	9	0	7.49085e-08	NM_198217	ING1	-5405
chr12	103851126	103851285	103851282	9	0	7.49085e-08	NR_027249	TTC41P	0
chr12	120467584	120471416	120469774	9	0	7.49085e-08	NM_003769	SRSF9	0
chr14	58626428	58626585	58626582	9	0	7.49085e-08	NR_046093	DACT1	7483
chr16	86751193	86751857	86751521	9	0	7.49085e-08	NR_135182	LINC02188	-13367
chr12	46381179	46386687	46382944	9	0	7.49085e-08	NR_125379	LOC100288798	0
chr13	108987481	108987884	108987881	9	0	7.49085e-08	NM_015011	MYO16	0
chr3	11660829	11661800	11660876	9	0	7.49085e-08	NM_001284390	VGLL4	0
chr3	43608105	43608996	43608993	9	0	7.49085e-08	NM_001346464	ANO10	0
chr17	60135427	60136045	60135427	9	0	7.49085e-08	NM_000717	CA4	13891
chr12	133080014	133084946	133080031	9	0	7.49085e-08	NM_001300776	ZNF140	0
chr2	169726145	169728570	169726145	9	0	7.49085e-08	NR_144936	PHOSPHO2-KLHL23	0
chr3	43658208	43659690	43659687	9	0	7.49085e-08	NM_001346469	ANO10	0
chr2	107303975	107307530	107306504	9	0	7.49085e-08	NR_049853	MIR548AU	0
chr3	48932057	48932060	48932057	9	0	7.49085e-08	NM_001349210	ARIH2	0
chr2	55699799	55701941	55699799	9	0	7.49085e-08	NM_033109	PNPT1	-5889
chr17	59858476	59859536	59858476	9	0	7.49085e-08	NM_001193610	TUBD1	0
chr3	11591509	11591557	11591509	9	0	7.49085e-08	NM_001284390	VGLL4	0
chr17	4140187	4144805	4142389	9	0	7.49085e-08	NM_015113	ZZEF1	0
chr17	59372169	59373519	59372263	9	0	7.49085e-08	NM_001005404	YPEL2	0
chr2	19987932	19991460	19987932	9	0	7.49085e-08	NM_001006657	WDR35	0
chr15	63051126	63051803	63051522	9	0	7.49085e-08	NM_000366	TPM1	0
chr13	93217646	93217933	93217702	9	0	7.49085e-08	NM_005708	GPC6	8875
chr12	116959322	116959468	116959322	9	0	7.49085e-08	NM_012174	FBXW8	0
chr12	113184670	113184842	113184670	9	0	7.49085e-08	NM_001111322	DDX54	0
chr3	50328622	50328625	50328622	9	0	7.49085e-08	NM_007275	TUSC2	-384
chr14	67693191	67696949	67694102	9	0	7.49085e-08	NM_001252650	RDH11	0
chr17	9246990	9246993	9246990	9	0	7.49085e-08	NM_004822	NTN1	-2990
chr16	30632362	30638510	30634313	9	0	7.49085e-08	NM_001320464	PRR14	12192
chr17	8217388	8222198	8220314	9	0	7.49085e-08	NR_026951	LINC00324	0
chr16	10123341	10123347	10123343	9	0	7.49085e-08	NM_000833	GRIN2A	0
chr16	89499138	89499159	89499156	9	0	7.49085e-08	NM_001256183	ANKRD11	-8577
chr2	64998741	65002977	64998741	9	0	7.49085e-08	NM_001193493	SLC1A4	0
chr16	89971280	89975180	89971280	9	0	7.49085e-08	NM_145039	CENPBD1	0
chr16	3457315	3459762	3459222	9	0	7.49085e-08	NM_001083601	NAA60	0
chr15	64381820	64383049	64381820	9	0	7.49085e-08	NR_109934	PCLAF	0
chr16	3174271	3174446	3174443	9	0	7.49085e-08	NR_132322	CASP16P	-24325
chr17	7615067	7615471	7615436	9	0	7.49085e-08	NM_001289114	SHBG	0
chr3	48564078	48564568	48564078	9	0	7.49085e-08	NM_000094	COL7A1	0
chr13	108937152	108942788	108940140	9	0	7.49085e-08	NM_015011	MYO16	0
chr8	56201366	56202702	56202316	14	0	7.55995e-08	NM_002655	PLAG1	0
chr6	6004110	6009699	6006786	19	1	7.93348e-08	NM_001278710	NRN1	0
chr8	120838498	120838501	120838498	10	0	8.19198e-08	NM_021021	SNTB1	-26429
chr12	22512942	22515622	22513435	12	0	8.32328e-08	NM_001286174	C2CD5	0
chr21	34554004	34554294	34554030	15	0	8.38123e-08	NM_004414	RCAN1	0
chr6	43427427	43428395	43427427	10	0	9.07705e-08	NM_001350518	ABCC10	0
chr6	106398859	106399040	106398859	27	0	9.182e-08	NR_134603	LOC105377924	52456
chr8	80533169	80534852	80533270	23	2	9.25069e-08	NM_001277145	ZBTB10	-6904
chr10	14837403	14837615	14837404	22	2	9.25069e-08	NM_001029954	CDNF	0
chr19	17124441	17125598	17125560	22	1	9.25069e-08	NM_001130065	MYO9B	0
chr17	80789844	80792687	80791929	22	2	9.25069e-08	NM_020761	RPTOR	0
chr2	106164984	106165517	106165178	22	2	9.25069e-08	NM_001253875	UXS1	0
chr1	41880350	41880464	41880461	22	2	9.25069e-08	NM_001127714	HIVEP3	0
chr19	35395656	35398878	35396203	22	2	9.25069e-08	NR_040046	LINC01531	6729
chr3	149812154	149814443	149813518	22	2	9.25069e-08	NM_007282	RNF13	0
chr10	110303764	110305203	110305200	23	1	9.25069e-08	NM_005871	SMNDC1	0
chr12	49235252	49235255	49235252	10	0	9.40529e-08	NM_001303114	TUBA1C	0
chr11	12828129	12828990	12828587	21	1	9.5586e-08	NM_021961	TEAD1	0
chr4	89753715	89754670	89754068	12	0	9.63978e-08	NM_001146054	SNCA	0
chr9	111760431	111760434	111760431	9	0	9.75047e-08	NM_173521	C9orf84	0
chr4	186676651	186676654	186676651	9	0	9.77396e-08	NM_005245	FAT1	0
chr7	99551564	99551567	99551564	11	0	1.01191e-07	NM_145111	FAM200A	0
chr1	33255261	33257137	33255772	11	0	1.01191e-07	NM_152493	ZNF362	0
chr11	78517674	78517906	78517674	13	0	1.01206e-07	NM_001243251	NARS2	0
chr3	89549481	89549484	89549481	9	0	1.01954e-07	NM_005233	EPHA3	-67347
chr15	44662338	44664420	44663855	11	0	1.05881e-07	NM_001160227	SPG11	0
chr9	32194647	32194650	32194647	9	0	1.0709e-07	NM_002197	ACO1	189953
chrX	54639004	54640437	54639293	18	0	1.0849e-07	NM_019067	GNL3L	-71717
chr4	183506417	183506420	183506417	9	0	1.10175e-07	NM_001564	ING2	0
chr1	11261948	11263163	11263039	14	0	1.15533e-07	NM_004958	MTOR	0
chr8	17921358	17924521	17922812	22	0	1.15754e-07	NM_001352638	PCM1	0
chr11	34891825	34894776	34893299	12	0	1.16552e-07	NM_015957	APIP	0
chr4	111203350	111203353	111203350	9	0	1.27209e-07	NR_030643	MIR297	-342703
chr17	67558300	67558677	67558580	11	0	1.28379e-07	NM_181671	PITPNC1	0
chr19	1354125	1356065	1354125	10	0	1.28379e-07	NM_032853	MUM1	0
chr12	27838677	27841480	27841465	23	1	1.29249e-07	NM_020782	KLHL42	-35637
chr5	112848103	112848106	112848103	9	0	1.34919e-07	NM_001127511	APC	-1864
chr19	9722484	9722491	9722484	9	0	1.36566e-07	NR_146444	ZNF812P	-21708
chr22	43953905	43955912	43954014	15	0	1.42681e-07	NM_015380	SAMM50	0
chr12	121888426	121889240	121888426	10	0	1.46302e-07	NM_001171993	HPD	0
chr6	11428846	11432837	11432834	13	0	1.49411e-07	NM_001142393	NEDD9	-46498
chr11	35991740	35994596	35993897	13	0	1.50145e-07	NM_001304264	LDLRAD3	0
chr7	50739978	50740092	50739978	9	0	1.5243e-07	NM_001001555	GRB10	0
chr3	49429433	49430015	49429433	34	5	1.53038e-07	NM_032316	NICN1	-109
chr14	24443008	24443243	24443101	11	0	1.53111e-07	NR_110032	LOC101927045	0
chr1	23377171	23377636	23377583	10	0	1.53111e-07	NM_003196	TCEA3	3273
chr5	77086801	77086804	77086801	9	0	1.56601e-07	NM_001329564	ZBED3	0
chr7	130995570	130995573	130995570	9	0	1.59632e-07	NR_109855	LINC-PINT	0
chr10	98153356	98154006	98153406	14	0	1.59658e-07	NM_001351011	R3HCC1L	0
chr1	154478821	154479377	154479136	10	0	1.61484e-07	NM_001010846	SHE	101
chr3	11509025	11510385	11509158	44	8	1.67056e-07	NM_001349235	ATG7	0
chr3	29465492	29466682	29466679	13	0	1.70506e-07	NM_001177711	RBMS3	0
chr3	41235032	41235035	41235032	9	0	1.74283e-07	NM_001330729	CTNNB1	0
chr2	69913604	69914248	69914030	10	0	1.74449e-07	NM_001202514	MXD1	793
chr2	128089011	128093350	128091984	18	0	1.75695e-07	NM_020120	UGGT1	0
chr4	153755358	153755467	153755462	12	0	1.78065e-07	NM_173662	RNF175	0
chr7	141613031	141617503	141615902	16	0	1.79833e-07	NM_018238	AGK	0
chr1	228165443	228166935	228165443	10	0	1.95325e-07	NR_103540	IBA57-AS1	0
chr3	153161037	153164164	153161037	10	0	1.95325e-07	NM_002886	RAP2B	0
chr3	8630143	8630146	8630143	9	0	2.01148e-07	NM_001256748	SSUH2	0
chr2	133247556	133247630	133247615	9	0	2.05805e-07	NM_207363	NCKAP5	0
chr4	40055551	40060222	40058041	12	0	2.1764e-07	NR_027277	LOC344967	0
chr1	145751853	145751856	145751853	10	0	2.29307e-07	NM_014455	RNF115	0
chr9	15103466	15103469	15103466	10	0	2.29307e-07	NM_001168342	TTC39B	67375
chr12	104519276	104519403	104519400	10	0	2.29307e-07	NM_001173982	CHST11	0
chr1	150966119	150968838	150968835	10	0	2.29307e-07	NM_022075	CERS2	0
chr6	27583392	27583395	27583392	11	0	2.29307e-07	NR_144687	ZNF184	-110274
chr8	38058072	38058075	38058072	10	0	2.29307e-07	NM_004095	EIF4EBP1	0
chr11	62728753	62728756	62728753	9	0	2.29835e-07	NM_001318812	TTC9C	0
chr2	207711611	207711657	207711611	9	0	2.29835e-07	NM_152523	CCNYL1	0
chr9	66900475	66902859	66900675	15	0	2.41003e-07	NM_033160	ZNF658	0
chr7	102872492	102874489	102872736	13	0	2.44828e-07	NR_105043	FBXL13	0
chr11	112087556	112087816	112087812	12	0	2.44828e-07	NM_001276503	SDHD	0
chr15	92723939	92725112	92724770	17	1	2.49043e-07	NM_207446	FAM174B	-68138
chr15	45637772	45640761	45640531	15	0	2.52927e-07	NM_001271213	SQOR	0
chr11	7519439	7519442	7519439	9	0	2.59061e-07	NM_003621	PPFIBP2	0
chr12	22971956	22972711	22972217	10	0	2.72526e-07	NR_120471	LOC101928441	202925
chr11	8864074	8867019	8865479	17	0	2.82849e-07	NM_005418	ST5	0
chr1	110187162	110188312	110188309	17	0	2.82849e-07	NM_001010898	SLC6A17	0
chr8	27772757	27777765	27772838	26	3	2.89319e-07	NM_001017420	ESCO2	0
chr10	58264533	58269617	58266472	25	3	2.89319e-07	NM_152230	IPMK	0
chr14	22587292	22589945	22589646	25	1	2.89319e-07	NM_001344	DAD1	0
chr20	51945573	51945723	51945720	10	0	2.89534e-07	NR_110016	LINC01429	-82660
chr2	197235863	197238592	197237223	23	2	2.8984e-07	NM_001195144	ANKRD44	0
chr4	87006447	87014349	87011737	28	3	2.96957e-07	NM_001166693	AFF1	0
chr6	72702595	72702896	72702595	9	0	2.97231e-07	NM_001160134	KCNQ5	0
chr1	235367072	235367898	235367731	10	0	3.0425e-07	NM_001079515	TBCE	0
chr22	40043064	40045830	40044141	27	2	3.05466e-07	NM_001024843	TNRC6B	0
chr9	121364249	121364252	121364249	9	0	3.10934e-07	NR_073037	STOM	0
chr3	5186861	5187778	5187231	11	0	3.12998e-07	NM_014674	EDEM1	0
chr6	147227939	147228437	147228434	12	0	3.46367e-07	NM_001127715	STXBP5	0
chr1	224727260	224727320	224727317	14	0	3.49578e-07	NR_136288	CNIH3	0
[truncated: 5,810 more rows]
